# Supplementary material for: A modified Wald interval for the area under the ROC curve (AUC) in diagnostic case-control studies
Source: BMC Med Res Methodol. 2014 Feb 19;14:26. doi: 10.1186/1471-2288-14-26 (PMC3938139; doi:10.1186/1471-2288-14-26)
Supplement: Additional file 2 — Result Tables. All simulation results in separate spreadsheets. [file 1471-2288-14-26-S2.xls]

## Sheet: Constant c
AUC_0	constant c	case-control ratio	n	Wald	Wald_cc
0.6	0.5	1:1	20	0.0285	0.0182
0.6	0.5	1:1	30	0.0186	0.0128
0.6	0.5	1:1	40	0.0185	0.0137
0.6	0.5	1:1	50	0.0144	0.0103
0.6	0.5	1:1	60	0.0125	0.0098
0.6	0.5	1:1	80	0.0133	0.0101
0.6	0.5	1:1	100	0.0123	0.0095
0.61	0.5	1:1	20	0.0284	0.0178
0.61	0.5	1:1	30	0.0198	0.0165
0.61	0.5	1:1	40	0.0178	0.0135
0.61	0.5	1:1	50	0.0149	0.0107
0.61	0.5	1:1	60	0.0132	0.0094
0.61	0.5	1:1	80	0.0118	0.0097
0.61	0.5	1:1	100	0.0128	0.0093
0.62	0.5	1:1	20	0.0281	0.0224
0.62	0.5	1:1	30	0.0224	0.0164
0.62	0.5	1:1	40	0.0185	0.013
0.62	0.5	1:1	50	0.0155	0.0115
0.62	0.5	1:1	60	0.0145	0.0106
0.62	0.5	1:1	80	0.0122	0.0092
0.62	0.5	1:1	100	0.014	0.0118
0.63	0.5	1:1	20	0.036	0.0226
0.63	0.5	1:1	30	0.0206	0.0164
0.63	0.5	1:1	40	0.0213	0.0153
0.63	0.5	1:1	50	0.0166	0.0122
0.63	0.5	1:1	60	0.015	0.0117
0.63	0.5	1:1	80	0.0121	0.01
0.63	0.5	1:1	100	0.0106	0.008
0.64	0.5	1:1	20	0.028	0.0219
0.64	0.5	1:1	30	0.0243	0.0157
0.64	0.5	1:1	40	0.0194	0.0142
0.64	0.5	1:1	50	0.0175	0.0139
0.64	0.5	1:1	60	0.0156	0.0128
0.64	0.5	1:1	80	0.0137	0.0108
0.64	0.5	1:1	100	0.011	0.0086
0.65	0.5	1:1	20	0.0352	0.0231
0.65	0.5	1:1	30	0.0219	0.0169
0.65	0.5	1:1	40	0.0198	0.0154
0.65	0.5	1:1	50	0.0158	0.0123
0.65	0.5	1:1	60	0.0159	0.0127
0.65	0.5	1:1	80	0.0149	0.0119
0.65	0.5	1:1	100	0.0103	0.0083
0.66	0.5	1:1	20	0.0301	0.0229
0.66	0.5	1:1	30	0.0241	0.0173
0.66	0.5	1:1	40	0.0196	0.0146
0.66	0.5	1:1	50	0.0172	0.0134
0.66	0.5	1:1	60	0.015	0.0107
0.66	0.5	1:1	80	0.0133	0.0103
0.66	0.5	1:1	100	0.0113	0.0087
0.67	0.5	1:1	20	0.0275	0.0209
0.67	0.5	1:1	30	0.024	0.0192
0.67	0.5	1:1	40	0.0216	0.017
0.67	0.5	1:1	50	0.0163	0.0117
0.67	0.5	1:1	60	0.0167	0.0122
0.67	0.5	1:1	80	0.0133	0.011
0.67	0.5	1:1	100	0.0135	0.0102
0.68	0.5	1:1	20	0.0417	0.0249
0.68	0.5	1:1	30	0.0264	0.019
0.68	0.5	1:1	40	0.0208	0.0158
0.68	0.5	1:1	50	0.0206	0.0139
0.68	0.5	1:1	60	0.0162	0.0114
0.68	0.5	1:1	80	0.015	0.0116
0.68	0.5	1:1	100	0.0124	0.0104
0.69	0.5	1:1	20	0.0337	0.0266
0.69	0.5	1:1	30	0.0236	0.018
0.69	0.5	1:1	40	0.0202	0.015
0.69	0.5	1:1	50	0.0193	0.0142
0.69	0.5	1:1	60	0.0176	0.0131
0.69	0.5	1:1	80	0.0146	0.0109
0.69	0.5	1:1	100	0.0113	0.0087
0.7	0.5	1:1	20	0.0339	0.0188
0.7	0.5	1:1	30	0.0256	0.0197
0.7	0.5	1:1	40	0.0219	0.014
0.7	0.5	1:1	50	0.0181	0.0142
0.7	0.5	1:1	60	0.0175	0.0125
0.7	0.5	1:1	80	0.0141	0.012
0.7	0.5	1:1	100	0.0145	0.012
0.71	0.5	1:1	20	0.0338	0.025
0.71	0.5	1:1	30	0.0253	0.0194
0.71	0.5	1:1	40	0.0226	0.0171
0.71	0.5	1:1	50	0.0185	0.0142
0.71	0.5	1:1	60	0.0149	0.0116
0.71	0.5	1:1	80	0.0167	0.0129
0.71	0.5	1:1	100	0.0126	0.0094
0.72	0.5	1:1	20	0.0419	0.0244
0.72	0.5	1:1	30	0.0305	0.0237
0.72	0.5	1:1	40	0.0208	0.0152
0.72	0.5	1:1	50	0.0212	0.0148
0.72	0.5	1:1	60	0.0179	0.0137
0.72	0.5	1:1	80	0.0141	0.0111
0.72	0.5	1:1	100	0.0145	0.011
0.73	0.5	1:1	20	0.0385	0.0283
0.73	0.5	1:1	30	0.0286	0.0185
0.73	0.5	1:1	40	0.0248	0.0173
0.73	0.5	1:1	50	0.0182	0.0141
0.73	0.5	1:1	60	0.0188	0.0142
0.73	0.5	1:1	80	0.0151	0.0114
0.73	0.5	1:1	100	0.0139	0.0104
0.74	0.5	1:1	20	0.0436	0.0251
0.74	0.5	1:1	30	0.029	0.0205
0.74	0.5	1:1	40	0.0251	0.019
0.74	0.5	1:1	50	0.0223	0.0157
0.74	0.5	1:1	60	0.0197	0.015
0.74	0.5	1:1	80	0.0163	0.0131
0.74	0.5	1:1	100	0.0121	0.0092
0.75	0.5	1:1	20	0.0405	0.031
0.75	0.5	1:1	30	0.0293	0.0215
0.75	0.5	1:1	40	0.0256	0.019
0.75	0.5	1:1	50	0.0223	0.0169
0.75	0.5	1:1	60	0.02	0.0149
0.75	0.5	1:1	80	0.0157	0.0113
0.75	0.5	1:1	100	0.0156	0.0122
0.76	0.5	1:1	20	0.0502	0.0273
0.76	0.5	1:1	30	0.0333	0.0251
0.76	0.5	1:1	40	0.023	0.0158
0.76	0.5	1:1	50	0.022	0.0161
0.76	0.5	1:1	60	0.0177	0.0122
0.76	0.5	1:1	80	0.0147	0.011
0.76	0.5	1:1	100	0.0148	0.0108
0.77	0.5	1:1	20	0.0453	0.0336
0.77	0.5	1:1	30	0.028	0.0198
0.77	0.5	1:1	40	0.0268	0.0191
0.77	0.5	1:1	50	0.0194	0.0139
0.77	0.5	1:1	60	0.0196	0.0147
0.77	0.5	1:1	80	0.0166	0.0125
0.77	0.5	1:1	100	0.0156	0.0112
0.78	0.5	1:1	20	0.0504	0.0375
0.78	0.5	1:1	30	0.0296	0.0196
0.78	0.5	1:1	40	0.0278	0.0187
0.78	0.5	1:1	50	0.0225	0.0169
0.78	0.5	1:1	60	0.0198	0.0151
0.78	0.5	1:1	80	0.0148	0.0117
0.78	0.5	1:1	100	0.0146	0.011
0.79	0.5	1:1	20	0.0509	0.0378
0.79	0.5	1:1	30	0.0359	0.0239
0.79	0.5	1:1	40	0.0249	0.017
0.79	0.5	1:1	50	0.0227	0.0159
0.79	0.5	1:1	60	0.0188	0.014
0.79	0.5	1:1	80	0.0181	0.0138
0.79	0.5	1:1	100	0.0162	0.0125
0.8	0.5	1:1	20	0.053	0.0382
0.8	0.5	1:1	30	0.038	0.0274
0.8	0.5	1:1	40	0.0282	0.0191
0.8	0.5	1:1	50	0.0256	0.0184
0.8	0.5	1:1	60	0.0202	0.0157
0.8	0.5	1:1	80	0.0144	0.0112
0.8	0.5	1:1	100	0.0145	0.0112
0.81	0.5	1:1	20	0.0478	0.0341
0.81	0.5	1:1	30	0.0414	0.0281
0.81	0.5	1:1	40	0.0263	0.0177
0.81	0.5	1:1	50	0.0238	0.0166
0.81	0.5	1:1	60	0.0181	0.013
0.81	0.5	1:1	80	0.0177	0.0128
0.81	0.5	1:1	100	0.0142	0.0107
0.82	0.5	1:1	20	0.057	0.0405
0.82	0.5	1:1	30	0.0431	0.0289
0.82	0.5	1:1	40	0.0303	0.0239
0.82	0.5	1:1	50	0.0263	0.0191
0.82	0.5	1:1	60	0.0204	0.0138
0.82	0.5	1:1	80	0.0164	0.0112
0.82	0.5	1:1	100	0.014	0.0101
0.83	0.5	1:1	20	0.0697	0.0489
0.83	0.5	1:1	30	0.0388	0.0322
0.83	0.5	1:1	40	0.0267	0.0177
0.83	0.5	1:1	50	0.0243	0.019
0.83	0.5	1:1	60	0.0215	0.0147
0.83	0.5	1:1	80	0.0164	0.0114
0.83	0.5	1:1	100	0.0164	0.0118
0.84	0.5	1:1	20	0.0569	0.0405
0.84	0.5	1:1	30	0.037	0.0296
0.84	0.5	1:1	40	0.0323	0.0215
0.84	0.5	1:1	50	0.0248	0.0175
0.84	0.5	1:1	60	0.0192	0.0128
0.84	0.5	1:1	80	0.0146	0.0105
0.84	0.5	1:1	100	0.0142	0.0105
0.85	0.5	1:1	20	0.0762	0.0537
0.85	0.5	1:1	30	0.0412	0.0332
0.85	0.5	1:1	40	0.0329	0.0222
0.85	0.5	1:1	50	0.026	0.0194
0.85	0.5	1:1	60	0.022	0.016
0.85	0.5	1:1	80	0.0186	0.0128
0.85	0.5	1:1	100	0.0153	0.0117
0.86	0.5	1:1	20	0.0617	0.0617
0.86	0.5	1:1	30	0.0412	0.0321
0.86	0.5	1:1	40	0.0322	0.0198
0.86	0.5	1:1	50	0.0312	0.0198
0.86	0.5	1:1	60	0.0205	0.0153
0.86	0.5	1:1	80	0.0199	0.0151
0.86	0.5	1:1	100	0.0149	0.0107
0.87	0.5	1:1	20	0.0801	0.0489
0.87	0.5	1:1	30	0.0452	0.035
0.87	0.5	1:1	40	0.0358	0.0209
0.87	0.5	1:1	50	0.0276	0.0176
0.87	0.5	1:1	60	0.0235	0.0166
0.87	0.5	1:1	80	0.0193	0.0148
0.87	0.5	1:1	100	0.015	0.011
0.88	0.5	1:1	20	0.0894	0.0545
0.88	0.5	1:1	30	0.0475	0.0363
0.88	0.5	1:1	40	0.0376	0.0261
0.88	0.5	1:1	50	0.0287	0.019
0.88	0.5	1:1	60	0.0229	0.0153
0.88	0.5	1:1	80	0.0177	0.0121
0.88	0.5	1:1	100	0.0183	0.0136
0.89	0.5	1:1	20	0.0728	0.0728
0.89	0.5	1:1	30	0.0517	0.0386
0.89	0.5	1:1	40	0.0389	0.0269
0.89	0.5	1:1	50	0.0302	0.0201
0.89	0.5	1:1	60	0.0254	0.0169
0.89	0.5	1:1	80	0.0201	0.0134
0.89	0.5	1:1	100	0.0169	0.0108
0.9	0.5	1:1	20	0.0852	0.0534
0.9	0.5	1:1	30	0.0611	0.0341
0.9	0.5	1:1	40	0.0391	0.025
0.9	0.5	1:1	50	0.033	0.0212
0.9	0.5	1:1	60	0.024	0.0149
0.9	0.5	1:1	80	0.0191	0.0122
0.9	0.5	1:1	100	0.0158	0.0118
0.6	0.51	1:1	20	0.0294	0.0189
0.6	0.51	1:1	30	0.0194	0.0151
0.6	0.51	1:1	40	0.0179	0.013
0.6	0.51	1:1	50	0.014	0.0098
0.6	0.51	1:1	60	0.0142	0.0116
0.6	0.51	1:1	80	0.0142	0.0108
0.6	0.51	1:1	100	0.0106	0.0084
0.61	0.51	1:1	20	0.0246	0.0187
0.61	0.51	1:1	30	0.0221	0.0164
0.61	0.51	1:1	40	0.0174	0.0128
0.61	0.51	1:1	50	0.0159	0.0125
0.61	0.51	1:1	60	0.0136	0.0104
0.61	0.51	1:1	80	0.0124	0.0099
0.61	0.51	1:1	100	0.0118	0.0092
0.62	0.51	1:1	20	0.0275	0.0227
0.62	0.51	1:1	30	0.0239	0.0181
0.62	0.51	1:1	40	0.0169	0.0119
0.62	0.51	1:1	50	0.0192	0.0145
0.62	0.51	1:1	60	0.0147	0.0109
0.62	0.51	1:1	80	0.0135	0.0114
0.62	0.51	1:1	100	0.0132	0.0099
0.63	0.51	1:1	20	0.0309	0.0161
0.63	0.51	1:1	30	0.0254	0.0175
0.63	0.51	1:1	40	0.0194	0.0131
0.63	0.51	1:1	50	0.0144	0.0101
0.63	0.51	1:1	60	0.0169	0.0134
0.63	0.51	1:1	80	0.0153	0.0119
0.63	0.51	1:1	100	0.0137	0.0119
0.64	0.51	1:1	20	0.0291	0.0227
0.64	0.51	1:1	30	0.024	0.0159
0.64	0.51	1:1	40	0.0184	0.0132
0.64	0.51	1:1	50	0.0155	0.0126
0.64	0.51	1:1	60	0.0152	0.0112
0.64	0.51	1:1	80	0.0135	0.0104
0.64	0.51	1:1	100	0.0142	0.0114
0.65	0.51	1:1	20	0.031	0.0193
0.65	0.51	1:1	30	0.0218	0.0171
0.65	0.51	1:1	40	0.0187	0.0143
0.65	0.51	1:1	50	0.0176	0.0138
0.65	0.51	1:1	60	0.0161	0.0124
0.65	0.51	1:1	80	0.0152	0.0121
0.65	0.51	1:1	100	0.0149	0.0128
0.66	0.51	1:1	20	0.0315	0.0238
0.66	0.51	1:1	30	0.0243	0.0195
0.66	0.51	1:1	40	0.0203	0.0153
0.66	0.51	1:1	50	0.0165	0.0124
0.66	0.51	1:1	60	0.0163	0.0124
0.66	0.51	1:1	80	0.0147	0.0117
0.66	0.51	1:1	100	0.0119	0.0099
0.67	0.51	1:1	20	0.0378	0.0236
0.67	0.51	1:1	30	0.0222	0.0169
0.67	0.51	1:1	40	0.0185	0.0142
0.67	0.51	1:1	50	0.0205	0.0151
0.67	0.51	1:1	60	0.0168	0.0138
0.67	0.51	1:1	80	0.0156	0.012
0.67	0.51	1:1	100	0.015	0.012
0.68	0.51	1:1	20	0.0341	0.0267
0.68	0.51	1:1	30	0.0269	0.0204
0.68	0.51	1:1	40	0.0209	0.0137
0.68	0.51	1:1	50	0.0183	0.0147
0.68	0.51	1:1	60	0.0169	0.0128
0.68	0.51	1:1	80	0.015	0.0124
0.68	0.51	1:1	100	0.0129	0.0096
0.69	0.51	1:1	20	0.0326	0.0251
0.69	0.51	1:1	30	0.0279	0.0195
0.69	0.51	1:1	40	0.0208	0.0136
0.69	0.51	1:1	50	0.0195	0.0139
0.69	0.51	1:1	60	0.0188	0.0141
0.69	0.51	1:1	80	0.0156	0.0123
0.69	0.51	1:1	100	0.0131	0.0099
0.7	0.51	1:1	20	0.0382	0.0298
0.7	0.51	1:1	30	0.0254	0.0194
0.7	0.51	1:1	40	0.0235	0.018
0.7	0.51	1:1	50	0.0179	0.0129
0.7	0.51	1:1	60	0.0155	0.0118
0.7	0.51	1:1	80	0.0132	0.0104
0.7	0.51	1:1	100	0.0131	0.009
0.71	0.51	1:1	20	0.0362	0.0283
0.71	0.51	1:1	30	0.0279	0.0179
0.71	0.51	1:1	40	0.0197	0.0144
0.71	0.51	1:1	50	0.0219	0.0161
0.71	0.51	1:1	60	0.0197	0.0155
0.71	0.51	1:1	80	0.0142	0.0107
0.71	0.51	1:1	100	0.014	0.0104
0.72	0.51	1:1	20	0.0413	0.0258
0.72	0.51	1:1	30	0.0279	0.0195
0.72	0.51	1:1	40	0.0244	0.0171
0.72	0.51	1:1	50	0.0208	0.0153
0.72	0.51	1:1	60	0.018	0.0137
0.72	0.51	1:1	80	0.0173	0.0136
0.72	0.51	1:1	100	0.0128	0.0101
0.73	0.51	1:1	20	0.0393	0.0301
0.73	0.51	1:1	30	0.0304	0.0223
0.73	0.51	1:1	40	0.027	0.0203
0.73	0.51	1:1	50	0.0212	0.0151
0.73	0.51	1:1	60	0.0199	0.0145
0.73	0.51	1:1	80	0.0141	0.0109
0.73	0.51	1:1	100	0.0154	0.0116
0.74	0.51	1:1	20	0.0452	0.0341
0.74	0.51	1:1	30	0.032	0.0209
0.74	0.51	1:1	40	0.0227	0.0178
0.74	0.51	1:1	50	0.0203	0.0161
0.74	0.51	1:1	60	0.0183	0.0125
0.74	0.51	1:1	80	0.0152	0.0113
0.74	0.51	1:1	100	0.0154	0.0107
0.75	0.51	1:1	20	0.0455	0.0339
0.75	0.51	1:1	30	0.0292	0.0218
0.75	0.51	1:1	40	0.0233	0.0178
0.75	0.51	1:1	50	0.0208	0.0161
0.75	0.51	1:1	60	0.019	0.0122
0.75	0.51	1:1	80	0.0165	0.0134
0.75	0.51	1:1	100	0.0139	0.011
0.76	0.51	1:1	20	0.0451	0.0348
0.76	0.51	1:1	30	0.029	0.0214
0.76	0.51	1:1	40	0.0245	0.0183
0.76	0.51	1:1	50	0.0224	0.0159
0.76	0.51	1:1	60	0.0209	0.0154
0.76	0.51	1:1	80	0.0169	0.0135
0.76	0.51	1:1	100	0.0151	0.011
0.77	0.51	1:1	20	0.047	0.0345
0.77	0.51	1:1	30	0.0358	0.0248
0.77	0.51	1:1	40	0.03	0.0229
0.77	0.51	1:1	50	0.0245	0.0164
0.77	0.51	1:1	60	0.0212	0.0158
0.77	0.51	1:1	80	0.0182	0.0147
0.77	0.51	1:1	100	0.0177	0.0137
0.78	0.51	1:1	20	0.0498	0.0369
0.78	0.51	1:1	30	0.0322	0.0249
0.78	0.51	1:1	40	0.025	0.019
0.78	0.51	1:1	50	0.0222	0.0162
0.78	0.51	1:1	60	0.0206	0.0145
0.78	0.51	1:1	80	0.0189	0.0143
0.78	0.51	1:1	100	0.0155	0.012
0.79	0.51	1:1	20	0.0468	0.0337
0.79	0.51	1:1	30	0.0353	0.0241
0.79	0.51	1:1	40	0.0291	0.019
0.79	0.51	1:1	50	0.0244	0.0181
0.79	0.51	1:1	60	0.02	0.0148
0.79	0.51	1:1	80	0.017	0.0129
0.79	0.51	1:1	100	0.014	0.0108
0.8	0.51	1:1	20	0.0554	0.0402
0.8	0.51	1:1	30	0.0333	0.0226
0.8	0.51	1:1	40	0.0284	0.0192
0.8	0.51	1:1	50	0.0252	0.02
0.8	0.51	1:1	60	0.0194	0.0144
0.8	0.51	1:1	80	0.02	0.015
0.8	0.51	1:1	100	0.018	0.014
0.81	0.51	1:1	20	0.0464	0.0305
0.81	0.51	1:1	30	0.041	0.0286
0.81	0.51	1:1	40	0.0278	0.0191
0.81	0.51	1:1	50	0.026	0.0187
0.81	0.51	1:1	60	0.0234	0.0178
0.81	0.51	1:1	80	0.0175	0.0123
0.81	0.51	1:1	100	0.0157	0.0125
0.82	0.51	1:1	20	0.0601	0.0412
0.82	0.51	1:1	30	0.0424	0.0296
0.82	0.51	1:1	40	0.0312	0.0203
0.82	0.51	1:1	50	0.0263	0.0173
0.82	0.51	1:1	60	0.0242	0.0177
0.82	0.51	1:1	80	0.0184	0.0143
0.82	0.51	1:1	100	0.0175	0.0128
0.83	0.51	1:1	20	0.0724	0.0495
0.83	0.51	1:1	30	0.0423	0.0282
0.83	0.51	1:1	40	0.0308	0.024
0.83	0.51	1:1	50	0.0265	0.0191
0.83	0.51	1:1	60	0.0217	0.0147
0.83	0.51	1:1	80	0.0178	0.0121
0.83	0.51	1:1	100	0.0162	0.012
0.84	0.51	1:1	20	0.0575	0.0372
0.84	0.51	1:1	30	0.0397	0.0313
0.84	0.51	1:1	40	0.0294	0.0228
0.84	0.51	1:1	50	0.03	0.0223
0.84	0.51	1:1	60	0.0218	0.0154
0.84	0.51	1:1	80	0.0162	0.0119
0.84	0.51	1:1	100	0.0183	0.0138
0.85	0.51	1:1	20	0.0729	0.052
0.85	0.51	1:1	30	0.0397	0.0317
0.85	0.51	1:1	40	0.0301	0.023
0.85	0.51	1:1	50	0.0253	0.0161
0.85	0.51	1:1	60	0.025	0.0165
0.85	0.51	1:1	80	0.0175	0.0131
0.85	0.51	1:1	100	0.0162	0.0127
0.86	0.51	1:1	20	0.063	0.063
0.86	0.51	1:1	30	0.042	0.0322
0.86	0.51	1:1	40	0.0347	0.0249
0.86	0.51	1:1	50	0.0281	0.019
0.86	0.51	1:1	60	0.027	0.0168
0.86	0.51	1:1	80	0.0211	0.0147
0.86	0.51	1:1	100	0.0155	0.0122
0.87	0.51	1:1	20	0.0718	0.0426
0.87	0.51	1:1	30	0.0424	0.0339
0.87	0.51	1:1	40	0.0358	0.0252
0.87	0.51	1:1	50	0.0284	0.0177
0.87	0.51	1:1	60	0.0254	0.0166
0.87	0.51	1:1	80	0.0203	0.0143
0.87	0.51	1:1	100	0.0172	0.0119
0.88	0.51	1:1	20	0.0984	0.0635
0.88	0.51	1:1	30	0.0441	0.0343
0.88	0.51	1:1	40	0.035	0.024
0.88	0.51	1:1	50	0.0284	0.0201
0.88	0.51	1:1	60	0.0247	0.0182
0.88	0.51	1:1	80	0.0197	0.0137
0.88	0.51	1:1	100	0.0171	0.0107
0.89	0.51	1:1	20	0.0777	0.0777
0.89	0.51	1:1	30	0.0454	0.033
0.89	0.51	1:1	40	0.0396	0.0265
0.89	0.51	1:1	50	0.0316	0.0225
0.89	0.51	1:1	60	0.0262	0.0171
0.89	0.51	1:1	80	0.0192	0.0129
0.89	0.51	1:1	100	0.0156	0.0119
0.9	0.51	1:1	20	0.0942	0.0942
0.9	0.51	1:1	30	0.0643	0.0352
0.9	0.51	1:1	40	0.0369	0.0257
0.9	0.51	1:1	50	0.0321	0.0189
0.9	0.51	1:1	60	0.0272	0.0189
0.9	0.51	1:1	80	0.0214	0.0139
0.9	0.51	1:1	100	0.0172	0.0127
0.6	0.52	1:1	20	0.0286	0.0178
0.6	0.52	1:1	30	0.0229	0.017
0.6	0.52	1:1	40	0.0191	0.0153
0.6	0.52	1:1	50	0.016	0.012
0.6	0.52	1:1	60	0.0116	0.0099
0.6	0.52	1:1	80	0.0132	0.01
0.6	0.52	1:1	100	0.0126	0.0101
0.61	0.52	1:1	20	0.0291	0.0244
0.61	0.52	1:1	30	0.0232	0.0164
0.61	0.52	1:1	40	0.0192	0.0148
0.61	0.52	1:1	50	0.0182	0.0139
0.61	0.52	1:1	60	0.0172	0.0132
0.61	0.52	1:1	80	0.0162	0.0129
0.61	0.52	1:1	100	0.0132	0.0105
0.62	0.52	1:1	20	0.0316	0.0207
0.62	0.52	1:1	30	0.0228	0.0179
0.62	0.52	1:1	40	0.0188	0.014
0.62	0.52	1:1	50	0.0185	0.0152
0.62	0.52	1:1	60	0.0138	0.0106
0.62	0.52	1:1	80	0.0144	0.0113
0.62	0.52	1:1	100	0.0138	0.0114
0.63	0.52	1:1	20	0.0295	0.0221
0.63	0.52	1:1	30	0.022	0.0154
0.63	0.52	1:1	40	0.0197	0.0138
0.63	0.52	1:1	50	0.017	0.0121
0.63	0.52	1:1	60	0.0166	0.0131
0.63	0.52	1:1	80	0.0137	0.0112
0.63	0.52	1:1	100	0.0128	0.01
0.64	0.52	1:1	20	0.0314	0.0246
0.64	0.52	1:1	30	0.0216	0.017
0.64	0.52	1:1	40	0.019	0.0129
0.64	0.52	1:1	50	0.0159	0.0118
0.64	0.52	1:1	60	0.0161	0.0126
0.64	0.52	1:1	80	0.0161	0.0123
0.64	0.52	1:1	100	0.014	0.0115
0.65	0.52	1:1	20	0.0343	0.0202
0.65	0.52	1:1	30	0.0238	0.0168
0.65	0.52	1:1	40	0.021	0.0157
0.65	0.52	1:1	50	0.0156	0.0126
0.65	0.52	1:1	60	0.0177	0.0127
0.65	0.52	1:1	80	0.0135	0.0111
0.65	0.52	1:1	100	0.0154	0.0134
0.66	0.52	1:1	20	0.0351	0.0275
0.66	0.52	1:1	30	0.0234	0.0177
0.66	0.52	1:1	40	0.0227	0.016
0.66	0.52	1:1	50	0.0172	0.0123
0.66	0.52	1:1	60	0.0208	0.0164
0.66	0.52	1:1	80	0.0172	0.0131
0.66	0.52	1:1	100	0.0143	0.0113
0.67	0.52	1:1	20	0.0364	0.0228
0.67	0.52	1:1	30	0.025	0.0176
0.67	0.52	1:1	40	0.0209	0.0158
0.67	0.52	1:1	50	0.0181	0.0123
0.67	0.52	1:1	60	0.0181	0.0136
0.67	0.52	1:1	80	0.0183	0.0148
0.67	0.52	1:1	100	0.014	0.0117
0.68	0.52	1:1	20	0.0335	0.0273
0.68	0.52	1:1	30	0.0266	0.0208
0.68	0.52	1:1	40	0.0222	0.0172
0.68	0.52	1:1	50	0.0183	0.0147
0.68	0.52	1:1	60	0.017	0.0113
0.68	0.52	1:1	80	0.0143	0.011
0.68	0.52	1:1	100	0.0148	0.0117
0.69	0.52	1:1	20	0.033	0.0251
0.69	0.52	1:1	30	0.0286	0.019
0.69	0.52	1:1	40	0.0224	0.0175
0.69	0.52	1:1	50	0.02	0.0157
0.69	0.52	1:1	60	0.0194	0.0147
0.69	0.52	1:1	80	0.0182	0.0152
0.69	0.52	1:1	100	0.0146	0.012
0.7	0.52	1:1	20	0.039	0.0297
0.7	0.52	1:1	30	0.027	0.0195
0.7	0.52	1:1	40	0.0212	0.0177
0.7	0.52	1:1	50	0.0212	0.0162
0.7	0.52	1:1	60	0.0188	0.0145
0.7	0.52	1:1	80	0.0158	0.0126
0.7	0.52	1:1	100	0.0153	0.0122
0.71	0.52	1:1	20	0.036	0.0291
0.71	0.52	1:1	30	0.0302	0.0226
0.71	0.52	1:1	40	0.0253	0.0164
0.71	0.52	1:1	50	0.0193	0.0146
0.71	0.52	1:1	60	0.0192	0.0134
0.71	0.52	1:1	80	0.015	0.0123
0.71	0.52	1:1	100	0.0159	0.0125
0.72	0.52	1:1	20	0.0399	0.0315
0.72	0.52	1:1	30	0.0294	0.0202
0.72	0.52	1:1	40	0.0255	0.0186
0.72	0.52	1:1	50	0.0209	0.0147
0.72	0.52	1:1	60	0.0187	0.015
0.72	0.52	1:1	80	0.0144	0.0096
0.72	0.52	1:1	100	0.015	0.0118
0.73	0.52	1:1	20	0.04	0.0298
0.73	0.52	1:1	30	0.026	0.019
0.73	0.52	1:1	40	0.0249	0.0184
0.73	0.52	1:1	50	0.0219	0.0171
0.73	0.52	1:1	60	0.0168	0.0123
0.73	0.52	1:1	80	0.0178	0.0139
0.73	0.52	1:1	100	0.0141	0.0116
0.74	0.52	1:1	20	0.0463	0.0338
0.74	0.52	1:1	30	0.0319	0.0237
0.74	0.52	1:1	40	0.0244	0.0169
0.74	0.52	1:1	50	0.0207	0.0148
0.74	0.52	1:1	60	0.0191	0.0137
0.74	0.52	1:1	80	0.0189	0.0134
0.74	0.52	1:1	100	0.0138	0.0108
0.75	0.52	1:1	20	0.0384	0.029
0.75	0.52	1:1	30	0.0306	0.0222
0.75	0.52	1:1	40	0.0278	0.0197
0.75	0.52	1:1	50	0.0231	0.0166
0.75	0.52	1:1	60	0.0221	0.0151
0.75	0.52	1:1	80	0.0164	0.0126
0.75	0.52	1:1	100	0.0143	0.0111
0.76	0.52	1:1	20	0.0482	0.0355
0.76	0.52	1:1	30	0.0327	0.0238
0.76	0.52	1:1	40	0.024	0.0168
0.76	0.52	1:1	50	0.0228	0.0162
0.76	0.52	1:1	60	0.0223	0.0162
0.76	0.52	1:1	80	0.0162	0.0118
0.76	0.52	1:1	100	0.0125	0.0096
0.77	0.52	1:1	20	0.0468	0.0332
0.77	0.52	1:1	30	0.0333	0.0231
0.77	0.52	1:1	40	0.0243	0.0163
0.77	0.52	1:1	50	0.0226	0.0166
0.77	0.52	1:1	60	0.0209	0.0151
0.77	0.52	1:1	80	0.0171	0.0134
0.77	0.52	1:1	100	0.0137	0.0115
0.78	0.52	1:1	20	0.0508	0.0371
0.78	0.52	1:1	30	0.0383	0.0288
0.78	0.52	1:1	40	0.0287	0.0205
0.78	0.52	1:1	50	0.02	0.0139
0.78	0.52	1:1	60	0.0223	0.0153
0.78	0.52	1:1	80	0.0175	0.0134
0.78	0.52	1:1	100	0.0153	0.0123
0.79	0.52	1:1	20	0.0456	0.0325
0.79	0.52	1:1	30	0.0354	0.0249
0.79	0.52	1:1	40	0.0288	0.02
0.79	0.52	1:1	50	0.0265	0.0179
0.79	0.52	1:1	60	0.0211	0.0153
0.79	0.52	1:1	80	0.0174	0.0126
0.79	0.52	1:1	100	0.0161	0.012
0.8	0.52	1:1	20	0.0548	0.0387
0.8	0.52	1:1	30	0.0378	0.0249
0.8	0.52	1:1	40	0.0319	0.0223
0.8	0.52	1:1	50	0.027	0.0205
0.8	0.52	1:1	60	0.0222	0.0164
0.8	0.52	1:1	80	0.0178	0.0128
0.8	0.52	1:1	100	0.0172	0.0137
0.81	0.52	1:1	20	0.0646	0.0332
0.81	0.52	1:1	30	0.0402	0.0289
0.81	0.52	1:1	40	0.0294	0.0203
0.81	0.52	1:1	50	0.0248	0.0184
0.81	0.52	1:1	60	0.0213	0.0155
0.81	0.52	1:1	80	0.017	0.0124
0.81	0.52	1:1	100	0.0163	0.0119
0.82	0.52	1:1	20	0.0582	0.0409
0.82	0.52	1:1	30	0.04	0.0273
0.82	0.52	1:1	40	0.0312	0.022
0.82	0.52	1:1	50	0.0255	0.0179
0.82	0.52	1:1	60	0.0246	0.0195
0.82	0.52	1:1	80	0.0197	0.0149
0.82	0.52	1:1	100	0.0155	0.0117
0.83	0.52	1:1	20	0.0651	0.0454
0.83	0.52	1:1	30	0.0468	0.0318
0.83	0.52	1:1	40	0.0324	0.021
0.83	0.52	1:1	50	0.0266	0.0198
0.83	0.52	1:1	60	0.0239	0.0169
0.83	0.52	1:1	80	0.0199	0.0151
0.83	0.52	1:1	100	0.0174	0.0143
0.84	0.52	1:1	20	0.0621	0.0425
0.84	0.52	1:1	30	0.0481	0.031
0.84	0.52	1:1	40	0.0297	0.0226
0.84	0.52	1:1	50	0.0294	0.0201
0.84	0.52	1:1	60	0.0217	0.0154
0.84	0.52	1:1	80	0.0213	0.0158
0.84	0.52	1:1	100	0.0154	0.0112
0.85	0.52	1:1	20	0.0731	0.0498
0.85	0.52	1:1	30	0.0397	0.0314
0.85	0.52	1:1	40	0.0333	0.0262
0.85	0.52	1:1	50	0.0271	0.0186
0.85	0.52	1:1	60	0.0265	0.0186
0.85	0.52	1:1	80	0.0223	0.0161
0.85	0.52	1:1	100	0.0184	0.0137
0.86	0.52	1:1	20	0.09	0.063
0.86	0.52	1:1	30	0.0446	0.0371
0.86	0.52	1:1	40	0.0354	0.0266
0.86	0.52	1:1	50	0.0271	0.0204
0.86	0.52	1:1	60	0.0243	0.0167
0.86	0.52	1:1	80	0.018	0.0123
0.86	0.52	1:1	100	0.0176	0.0133
0.87	0.52	1:1	20	0.077	0.0447
0.87	0.52	1:1	30	0.0452	0.0368
0.87	0.52	1:1	40	0.0353	0.0239
0.87	0.52	1:1	50	0.0294	0.0212
0.87	0.52	1:1	60	0.025	0.016
0.87	0.52	1:1	80	0.0215	0.0163
0.87	0.52	1:1	100	0.0158	0.0123
0.88	0.52	1:1	20	0.0923	0.0581
0.88	0.52	1:1	30	0.0469	0.0367
0.88	0.52	1:1	40	0.0342	0.0243
0.88	0.52	1:1	50	0.0328	0.0195
0.88	0.52	1:1	60	0.0261	0.0157
0.88	0.52	1:1	80	0.0228	0.0153
0.88	0.52	1:1	100	0.0173	0.0126
0.89	0.52	1:1	20	0.1134	0.0701
0.89	0.52	1:1	30	0.0616	0.0353
0.89	0.52	1:1	40	0.0402	0.0272
0.89	0.52	1:1	50	0.0309	0.021
0.89	0.52	1:1	60	0.0295	0.0196
0.89	0.52	1:1	80	0.0223	0.0167
0.89	0.52	1:1	100	0.0167	0.0122
0.9	0.52	1:1	20	0.0919	0.0919
0.9	0.52	1:1	30	0.0623	0.033
0.9	0.52	1:1	40	0.0467	0.0251
0.9	0.52	1:1	50	0.0369	0.0239
0.9	0.52	1:1	60	0.0284	0.0185
0.9	0.52	1:1	80	0.0218	0.0154
0.9	0.52	1:1	100	0.0193	0.0139
0.6	0.53	1:1	20	0.0274	0.0179
0.6	0.53	1:1	30	0.0231	0.0159
0.6	0.53	1:1	40	0.015	0.0108
0.6	0.53	1:1	50	0.0193	0.0135
0.6	0.53	1:1	60	0.015	0.012
0.6	0.53	1:1	80	0.0161	0.0135
0.6	0.53	1:1	100	0.0113	0.0097
0.61	0.53	1:1	20	0.0279	0.0215
0.61	0.53	1:1	30	0.024	0.0162
0.61	0.53	1:1	40	0.0194	0.0135
0.61	0.53	1:1	50	0.0175	0.0133
0.61	0.53	1:1	60	0.0161	0.0121
0.61	0.53	1:1	80	0.0166	0.0123
0.61	0.53	1:1	100	0.0133	0.0101
0.62	0.53	1:1	20	0.032	0.0207
0.62	0.53	1:1	30	0.0243	0.0164
0.62	0.53	1:1	40	0.0186	0.0139
0.62	0.53	1:1	50	0.0183	0.0136
0.62	0.53	1:1	60	0.0166	0.0127
0.62	0.53	1:1	80	0.0172	0.0131
0.62	0.53	1:1	100	0.014	0.0112
0.63	0.53	1:1	20	0.0296	0.0234
0.63	0.53	1:1	30	0.0207	0.016
0.63	0.53	1:1	40	0.0206	0.0149
0.63	0.53	1:1	50	0.0164	0.0117
0.63	0.53	1:1	60	0.0173	0.0132
0.63	0.53	1:1	80	0.0136	0.0109
0.63	0.53	1:1	100	0.0131	0.0097
0.64	0.53	1:1	20	0.0353	0.0235
0.64	0.53	1:1	30	0.0235	0.015
0.64	0.53	1:1	40	0.0198	0.0155
0.64	0.53	1:1	50	0.0177	0.0125
0.64	0.53	1:1	60	0.0191	0.014
0.64	0.53	1:1	80	0.0168	0.0137
0.64	0.53	1:1	100	0.0124	0.0091
0.65	0.53	1:1	20	0.0351	0.0213
0.65	0.53	1:1	30	0.0248	0.0185
0.65	0.53	1:1	40	0.0228	0.0177
0.65	0.53	1:1	50	0.0211	0.0158
0.65	0.53	1:1	60	0.0182	0.0135
0.65	0.53	1:1	80	0.0166	0.0125
0.65	0.53	1:1	100	0.0153	0.0124
0.66	0.53	1:1	20	0.033	0.026
0.66	0.53	1:1	30	0.0292	0.0201
0.66	0.53	1:1	40	0.0201	0.0152
0.66	0.53	1:1	50	0.0197	0.0128
0.66	0.53	1:1	60	0.0199	0.0147
0.66	0.53	1:1	80	0.0151	0.0118
0.66	0.53	1:1	100	0.015	0.0122
0.67	0.53	1:1	20	0.0408	0.0261
0.67	0.53	1:1	30	0.0274	0.0211
0.67	0.53	1:1	40	0.0239	0.0187
0.67	0.53	1:1	50	0.0199	0.0148
0.67	0.53	1:1	60	0.0155	0.011
0.67	0.53	1:1	80	0.0149	0.0127
0.67	0.53	1:1	100	0.0166	0.0141
0.68	0.53	1:1	20	0.0327	0.0266
0.68	0.53	1:1	30	0.0296	0.0197
0.68	0.53	1:1	40	0.0229	0.0164
0.68	0.53	1:1	50	0.0231	0.0159
0.68	0.53	1:1	60	0.0174	0.0132
0.68	0.53	1:1	80	0.018	0.0143
0.68	0.53	1:1	100	0.015	0.0115
0.69	0.53	1:1	20	0.0424	0.0266
0.69	0.53	1:1	30	0.0256	0.0189
0.69	0.53	1:1	40	0.0245	0.0166
0.69	0.53	1:1	50	0.0211	0.0159
0.69	0.53	1:1	60	0.0178	0.0132
0.69	0.53	1:1	80	0.0184	0.0141
0.69	0.53	1:1	100	0.0158	0.0134
0.7	0.53	1:1	20	0.0402	0.0312
0.7	0.53	1:1	30	0.0311	0.0201
0.7	0.53	1:1	40	0.0229	0.0159
0.7	0.53	1:1	50	0.0192	0.0143
0.7	0.53	1:1	60	0.0213	0.0158
0.7	0.53	1:1	80	0.0173	0.0132
0.7	0.53	1:1	100	0.0161	0.0126
0.71	0.53	1:1	20	0.0451	0.0277
0.71	0.53	1:1	30	0.0299	0.0217
0.71	0.53	1:1	40	0.0233	0.0171
0.71	0.53	1:1	50	0.0209	0.0147
0.71	0.53	1:1	60	0.0192	0.0143
0.71	0.53	1:1	80	0.0161	0.0123
0.71	0.53	1:1	100	0.0156	0.0123
0.72	0.53	1:1	20	0.0407	0.0312
0.72	0.53	1:1	30	0.0315	0.0199
0.72	0.53	1:1	40	0.0248	0.0191
0.72	0.53	1:1	50	0.022	0.0165
0.72	0.53	1:1	60	0.0193	0.015
0.72	0.53	1:1	80	0.016	0.0129
0.72	0.53	1:1	100	0.0159	0.0124
0.73	0.53	1:1	20	0.0365	0.0295
0.73	0.53	1:1	30	0.0278	0.0186
0.73	0.53	1:1	40	0.0266	0.0181
0.73	0.53	1:1	50	0.0244	0.0178
0.73	0.53	1:1	60	0.0202	0.0151
0.73	0.53	1:1	80	0.0174	0.0145
0.73	0.53	1:1	100	0.0162	0.0126
0.74	0.53	1:1	20	0.0435	0.0336
0.74	0.53	1:1	30	0.0344	0.0255
0.74	0.53	1:1	40	0.0276	0.0219
0.74	0.53	1:1	50	0.0233	0.0162
0.74	0.53	1:1	60	0.0196	0.0136
0.74	0.53	1:1	80	0.0173	0.014
0.74	0.53	1:1	100	0.0139	0.0109
0.75	0.53	1:1	20	0.0419	0.0312
0.75	0.53	1:1	30	0.0364	0.0236
0.75	0.53	1:1	40	0.0251	0.0198
0.75	0.53	1:1	50	0.0219	0.0164
0.75	0.53	1:1	60	0.02	0.0149
0.75	0.53	1:1	80	0.0196	0.0153
0.75	0.53	1:1	100	0.018	0.0144
0.76	0.53	1:1	20	0.0516	0.0402
0.76	0.53	1:1	30	0.0309	0.0233
0.76	0.53	1:1	40	0.0272	0.0201
0.76	0.53	1:1	50	0.0251	0.0195
0.76	0.53	1:1	60	0.0202	0.0167
0.76	0.53	1:1	80	0.0167	0.0126
0.76	0.53	1:1	100	0.0155	0.0118
0.77	0.53	1:1	20	0.0409	0.0313
0.77	0.53	1:1	30	0.0348	0.0247
0.77	0.53	1:1	40	0.0256	0.0178
0.77	0.53	1:1	50	0.024	0.018
0.77	0.53	1:1	60	0.0232	0.0172
0.77	0.53	1:1	80	0.016	0.0117
0.77	0.53	1:1	100	0.0139	0.0096
0.78	0.53	1:1	20	0.0525	0.0397
0.78	0.53	1:1	30	0.0358	0.0273
0.78	0.53	1:1	40	0.0296	0.0223
0.78	0.53	1:1	50	0.0245	0.0185
0.78	0.53	1:1	60	0.0226	0.0164
0.78	0.53	1:1	80	0.0195	0.0144
0.78	0.53	1:1	100	0.0146	0.0114
0.79	0.53	1:1	20	0.0442	0.0317
0.79	0.53	1:1	30	0.0425	0.0303
0.79	0.53	1:1	40	0.0313	0.0227
0.79	0.53	1:1	50	0.0217	0.0156
0.79	0.53	1:1	60	0.0236	0.0179
0.79	0.53	1:1	80	0.0202	0.0161
0.79	0.53	1:1	100	0.0179	0.0129
0.8	0.53	1:1	20	0.0538	0.0391
0.8	0.53	1:1	30	0.039	0.0277
0.8	0.53	1:1	40	0.0306	0.0218
0.8	0.53	1:1	50	0.0275	0.0199
0.8	0.53	1:1	60	0.0203	0.0152
0.8	0.53	1:1	80	0.0197	0.0157
0.8	0.53	1:1	100	0.0185	0.0141
0.81	0.53	1:1	20	0.0661	0.0473
0.81	0.53	1:1	30	0.0389	0.0276
0.81	0.53	1:1	40	0.0323	0.0233
0.81	0.53	1:1	50	0.0257	0.0177
0.81	0.53	1:1	60	0.0218	0.0155
0.81	0.53	1:1	80	0.0206	0.0163
0.81	0.53	1:1	100	0.017	0.0135
0.82	0.53	1:1	20	0.06	0.042
0.82	0.53	1:1	30	0.043	0.03
0.82	0.53	1:1	40	0.0304	0.0201
0.82	0.53	1:1	50	0.027	0.0199
0.82	0.53	1:1	60	0.0251	0.0186
0.82	0.53	1:1	80	0.0182	0.0143
0.82	0.53	1:1	100	0.0186	0.0147
0.83	0.53	1:1	20	0.071	0.0505
0.83	0.53	1:1	30	0.0452	0.0298
0.83	0.53	1:1	40	0.0287	0.0184
0.83	0.53	1:1	50	0.0279	0.0197
0.83	0.53	1:1	60	0.0221	0.0156
0.83	0.53	1:1	80	0.0204	0.0153
0.83	0.53	1:1	100	0.0189	0.0131
0.84	0.53	1:1	20	0.0582	0.0413
0.84	0.53	1:1	30	0.0476	0.0324
0.84	0.53	1:1	40	0.0374	0.0254
0.84	0.53	1:1	50	0.0289	0.0191
0.84	0.53	1:1	60	0.0234	0.0167
0.84	0.53	1:1	80	0.0211	0.0156
0.84	0.53	1:1	100	0.0169	0.0125
0.85	0.53	1:1	20	0.0696	0.048
0.85	0.53	1:1	30	0.0538	0.035
0.85	0.53	1:1	40	0.0388	0.0248
0.85	0.53	1:1	50	0.0289	0.0204
0.85	0.53	1:1	60	0.0257	0.0171
0.85	0.53	1:1	80	0.0204	0.0145
0.85	0.53	1:1	100	0.0174	0.0125
0.86	0.53	1:1	20	0.0905	0.0642
0.86	0.53	1:1	30	0.0516	0.0328
0.86	0.53	1:1	40	0.0341	0.0255
0.86	0.53	1:1	50	0.0317	0.0203
0.86	0.53	1:1	60	0.0226	0.0166
0.86	0.53	1:1	80	0.0169	0.0127
0.86	0.53	1:1	100	0.0174	0.0126
0.87	0.53	1:1	20	0.0718	0.0424
0.87	0.53	1:1	30	0.0555	0.0344
0.87	0.53	1:1	40	0.0342	0.0245
0.87	0.53	1:1	50	0.0296	0.0212
0.87	0.53	1:1	60	0.0236	0.0165
0.87	0.53	1:1	80	0.0225	0.0153
0.87	0.53	1:1	100	0.0168	0.0117
0.88	0.53	1:1	20	0.0931	0.0593
0.88	0.53	1:1	30	0.0591	0.0351
0.88	0.53	1:1	40	0.0344	0.0237
0.88	0.53	1:1	50	0.033	0.0227
0.88	0.53	1:1	60	0.0275	0.0197
0.88	0.53	1:1	80	0.0209	0.0151
0.88	0.53	1:1	100	0.0171	0.0128
0.89	0.53	1:1	20	0.1105	0.0755
0.89	0.53	1:1	30	0.0611	0.037
0.89	0.53	1:1	40	0.0437	0.0243
0.89	0.53	1:1	50	0.0387	0.0222
0.89	0.53	1:1	60	0.029	0.0204
0.89	0.53	1:1	80	0.0226	0.0156
0.89	0.53	1:1	100	0.018	0.0129
0.9	0.53	1:1	20	0.0895	0.0895
0.9	0.53	1:1	30	0.0658	0.0349
0.9	0.53	1:1	40	0.0456	0.0314
0.9	0.53	1:1	50	0.0312	0.0218
0.9	0.53	1:1	60	0.0281	0.0188
0.9	0.53	1:1	80	0.0232	0.0155
0.9	0.53	1:1	100	0.019	0.013
0.6	0.54	1:1	20	0.0267	0.0221
0.6	0.54	1:1	30	0.0214	0.0169
0.6	0.54	1:1	40	0.0223	0.0152
0.6	0.54	1:1	50	0.0158	0.0111
0.6	0.54	1:1	60	0.0183	0.0146
0.6	0.54	1:1	80	0.0143	0.0109
0.6	0.54	1:1	100	0.0136	0.0104
0.61	0.54	1:1	20	0.0313	0.0209
0.61	0.54	1:1	30	0.0241	0.0166
0.61	0.54	1:1	40	0.0222	0.0171
0.61	0.54	1:1	50	0.0195	0.0147
0.61	0.54	1:1	60	0.018	0.0134
0.61	0.54	1:1	80	0.0145	0.0119
0.61	0.54	1:1	100	0.0157	0.0121
0.62	0.54	1:1	20	0.0301	0.0191
0.62	0.54	1:1	30	0.0219	0.0152
0.62	0.54	1:1	40	0.0204	0.0147
0.62	0.54	1:1	50	0.0176	0.0131
0.62	0.54	1:1	60	0.0203	0.0153
0.62	0.54	1:1	80	0.017	0.0126
0.62	0.54	1:1	100	0.0184	0.0146
0.63	0.54	1:1	20	0.0302	0.0233
0.63	0.54	1:1	30	0.027	0.0186
0.63	0.54	1:1	40	0.0223	0.0163
0.63	0.54	1:1	50	0.0186	0.0144
0.63	0.54	1:1	60	0.0191	0.0139
0.63	0.54	1:1	80	0.0164	0.0127
0.63	0.54	1:1	100	0.0148	0.0114
0.64	0.54	1:1	20	0.0387	0.0243
0.64	0.54	1:1	30	0.028	0.0185
0.64	0.54	1:1	40	0.0213	0.0162
0.64	0.54	1:1	50	0.0206	0.0154
0.64	0.54	1:1	60	0.0176	0.0127
0.64	0.54	1:1	80	0.0166	0.0136
0.64	0.54	1:1	100	0.0141	0.0111
0.65	0.54	1:1	20	0.0309	0.0254
0.65	0.54	1:1	30	0.0234	0.018
0.65	0.54	1:1	40	0.0228	0.0165
0.65	0.54	1:1	50	0.0169	0.0127
0.65	0.54	1:1	60	0.019	0.0146
0.65	0.54	1:1	80	0.0176	0.0135
0.65	0.54	1:1	100	0.0161	0.013
0.66	0.54	1:1	20	0.032	0.0252
0.66	0.54	1:1	30	0.0276	0.0181
0.66	0.54	1:1	40	0.0214	0.016
0.66	0.54	1:1	50	0.021	0.0152
0.66	0.54	1:1	60	0.0192	0.0143
0.66	0.54	1:1	80	0.0163	0.0119
0.66	0.54	1:1	100	0.0159	0.0136
0.67	0.54	1:1	20	0.0377	0.0232
0.67	0.54	1:1	30	0.0257	0.0195
0.67	0.54	1:1	40	0.0232	0.0158
0.67	0.54	1:1	50	0.0187	0.0149
0.67	0.54	1:1	60	0.0186	0.0155
0.67	0.54	1:1	80	0.0153	0.0127
0.67	0.54	1:1	100	0.0165	0.0141
0.68	0.54	1:1	20	0.0372	0.0302
0.68	0.54	1:1	30	0.0294	0.0198
0.68	0.54	1:1	40	0.0234	0.0164
0.68	0.54	1:1	50	0.0199	0.0161
0.68	0.54	1:1	60	0.0191	0.0149
0.68	0.54	1:1	80	0.0186	0.0139
0.68	0.54	1:1	100	0.0176	0.0137
0.69	0.54	1:1	20	0.0443	0.0263
0.69	0.54	1:1	30	0.0289	0.0228
0.69	0.54	1:1	40	0.0259	0.0197
0.69	0.54	1:1	50	0.0245	0.0172
0.69	0.54	1:1	60	0.017	0.0133
0.69	0.54	1:1	80	0.0169	0.0133
0.69	0.54	1:1	100	0.0163	0.0135
0.7	0.54	1:1	20	0.0385	0.0296
0.7	0.54	1:1	30	0.0307	0.0204
0.7	0.54	1:1	40	0.0254	0.0189
0.7	0.54	1:1	50	0.022	0.0161
0.7	0.54	1:1	60	0.0212	0.0157
0.7	0.54	1:1	80	0.0172	0.0136
0.7	0.54	1:1	100	0.016	0.0129
0.71	0.54	1:1	20	0.047	0.0273
0.71	0.54	1:1	30	0.0266	0.0203
0.71	0.54	1:1	40	0.0288	0.0205
0.71	0.54	1:1	50	0.0203	0.016
0.71	0.54	1:1	60	0.0221	0.0167
0.71	0.54	1:1	80	0.0192	0.0151
0.71	0.54	1:1	100	0.016	0.0124
0.72	0.54	1:1	20	0.0395	0.0304
0.72	0.54	1:1	30	0.0327	0.0235
0.72	0.54	1:1	40	0.0256	0.0181
0.72	0.54	1:1	50	0.0235	0.0172
0.72	0.54	1:1	60	0.0216	0.0159
0.72	0.54	1:1	80	0.0181	0.0132
0.72	0.54	1:1	100	0.0163	0.0123
0.73	0.54	1:1	20	0.0473	0.0277
0.73	0.54	1:1	30	0.0363	0.0242
0.73	0.54	1:1	40	0.0266	0.0206
0.73	0.54	1:1	50	0.024	0.0186
0.73	0.54	1:1	60	0.0203	0.0152
0.73	0.54	1:1	80	0.019	0.0146
0.73	0.54	1:1	100	0.0178	0.0138
0.74	0.54	1:1	20	0.048	0.0347
0.74	0.54	1:1	30	0.033	0.024
0.74	0.54	1:1	40	0.0262	0.0193
0.74	0.54	1:1	50	0.024	0.0176
0.74	0.54	1:1	60	0.02	0.0144
0.74	0.54	1:1	80	0.0177	0.0143
0.74	0.54	1:1	100	0.0153	0.0112
0.75	0.54	1:1	20	0.0507	0.0299
0.75	0.54	1:1	30	0.0353	0.0249
0.75	0.54	1:1	40	0.0303	0.0229
0.75	0.54	1:1	50	0.0251	0.0183
0.75	0.54	1:1	60	0.0206	0.015
0.75	0.54	1:1	80	0.0201	0.0151
0.75	0.54	1:1	100	0.0168	0.014
0.76	0.54	1:1	20	0.048	0.0346
0.76	0.54	1:1	30	0.0343	0.0226
0.76	0.54	1:1	40	0.0301	0.0218
0.76	0.54	1:1	50	0.0262	0.0183
0.76	0.54	1:1	60	0.0243	0.0169
0.76	0.54	1:1	80	0.0198	0.0151
0.76	0.54	1:1	100	0.0155	0.0129
0.77	0.54	1:1	20	0.0587	0.0308
0.77	0.54	1:1	30	0.0353	0.0255
0.77	0.54	1:1	40	0.0328	0.0203
0.77	0.54	1:1	50	0.0243	0.0182
0.77	0.54	1:1	60	0.0203	0.0158
0.77	0.54	1:1	80	0.0177	0.0133
0.77	0.54	1:1	100	0.0176	0.0132
0.78	0.54	1:1	20	0.0584	0.0422
0.78	0.54	1:1	30	0.0374	0.0269
0.78	0.54	1:1	40	0.0277	0.0196
0.78	0.54	1:1	50	0.0262	0.019
0.78	0.54	1:1	60	0.0215	0.0166
0.78	0.54	1:1	80	0.02	0.015
0.78	0.54	1:1	100	0.015	0.0123
0.79	0.54	1:1	20	0.0631	0.0339
0.79	0.54	1:1	30	0.0429	0.0306
0.79	0.54	1:1	40	0.0359	0.0257
0.79	0.54	1:1	50	0.0251	0.0171
0.79	0.54	1:1	60	0.025	0.0194
0.79	0.54	1:1	80	0.0224	0.017
0.79	0.54	1:1	100	0.0178	0.0129
0.8	0.54	1:1	20	0.0542	0.039
0.8	0.54	1:1	30	0.0347	0.0224
0.8	0.54	1:1	40	0.0336	0.023
0.8	0.54	1:1	50	0.0264	0.0184
0.8	0.54	1:1	60	0.0235	0.0182
0.8	0.54	1:1	80	0.0207	0.0161
0.8	0.54	1:1	100	0.0188	0.0152
0.81	0.54	1:1	20	0.0698	0.0513
0.81	0.54	1:1	30	0.0398	0.0288
0.81	0.54	1:1	40	0.031	0.0212
0.81	0.54	1:1	50	0.0276	0.0191
0.81	0.54	1:1	60	0.0255	0.0201
0.81	0.54	1:1	80	0.0182	0.013
0.81	0.54	1:1	100	0.0182	0.014
0.82	0.54	1:1	20	0.0608	0.0415
0.82	0.54	1:1	30	0.0424	0.0293
0.82	0.54	1:1	40	0.0325	0.0255
0.82	0.54	1:1	50	0.0286	0.0203
0.82	0.54	1:1	60	0.0227	0.0171
0.82	0.54	1:1	80	0.0176	0.0133
0.82	0.54	1:1	100	0.0157	0.0121
0.83	0.54	1:1	20	0.0701	0.0488
0.83	0.54	1:1	30	0.0461	0.0322
0.83	0.54	1:1	40	0.0348	0.0242
0.83	0.54	1:1	50	0.0274	0.0172
0.83	0.54	1:1	60	0.0268	0.0187
0.83	0.54	1:1	80	0.0185	0.014
0.83	0.54	1:1	100	0.0196	0.0148
0.84	0.54	1:1	20	0.0579	0.0395
0.84	0.54	1:1	30	0.0473	0.0317
0.84	0.54	1:1	40	0.0361	0.0233
0.84	0.54	1:1	50	0.0313	0.025
0.84	0.54	1:1	60	0.0275	0.0199
0.84	0.54	1:1	80	0.0216	0.0168
0.84	0.54	1:1	100	0.0182	0.0136
0.85	0.54	1:1	20	0.0796	0.0544
0.85	0.54	1:1	30	0.0509	0.0328
0.85	0.54	1:1	40	0.0367	0.0237
0.85	0.54	1:1	50	0.0314	0.0215
0.85	0.54	1:1	60	0.0256	0.0197
0.85	0.54	1:1	80	0.0242	0.0168
0.85	0.54	1:1	100	0.0159	0.0124
0.86	0.54	1:1	20	0.0886	0.0601
0.86	0.54	1:1	30	0.0504	0.0324
0.86	0.54	1:1	40	0.0405	0.0262
0.86	0.54	1:1	50	0.0369	0.0229
0.86	0.54	1:1	60	0.0305	0.0201
0.86	0.54	1:1	80	0.0223	0.0162
0.86	0.54	1:1	100	0.0188	0.0139
0.87	0.54	1:1	20	0.0753	0.0467
0.87	0.54	1:1	30	0.0537	0.0336
0.87	0.54	1:1	40	0.0396	0.0245
0.87	0.54	1:1	50	0.0283	0.0216
0.87	0.54	1:1	60	0.0227	0.0166
0.87	0.54	1:1	80	0.021	0.0144
0.87	0.54	1:1	100	0.0198	0.0138
0.88	0.54	1:1	20	0.0903	0.0571
0.88	0.54	1:1	30	0.059	0.0348
0.88	0.54	1:1	40	0.0449	0.027
0.88	0.54	1:1	50	0.0339	0.0235
0.88	0.54	1:1	60	0.0276	0.0199
0.88	0.54	1:1	80	0.0206	0.0125
0.88	0.54	1:1	100	0.02	0.0146
0.89	0.54	1:1	20	0.1117	0.0719
0.89	0.54	1:1	30	0.0632	0.0389
0.89	0.54	1:1	40	0.0451	0.0274
0.89	0.54	1:1	50	0.0362	0.025
0.89	0.54	1:1	60	0.0289	0.0195
0.89	0.54	1:1	80	0.0251	0.0172
0.89	0.54	1:1	100	0.0154	0.0109
0.9	0.54	1:1	20	0.0893	0.0893
0.9	0.54	1:1	30	0.0636	0.0356
0.9	0.54	1:1	40	0.0461	0.032
0.9	0.54	1:1	50	0.0396	0.0275
0.9	0.54	1:1	60	0.0288	0.02
0.9	0.54	1:1	80	0.0225	0.0162
0.9	0.54	1:1	100	0.0187	0.0119
0.6	0.55	1:1	20	0.0295	0.0239
0.6	0.55	1:1	30	0.0266	0.0174
0.6	0.55	1:1	40	0.0212	0.0178
0.6	0.55	1:1	50	0.0189	0.0143
0.6	0.55	1:1	60	0.0153	0.0123
0.6	0.55	1:1	80	0.016	0.0124
0.6	0.55	1:1	100	0.015	0.0123
0.61	0.55	1:1	20	0.0308	0.0199
0.61	0.55	1:1	30	0.0249	0.0149
0.61	0.55	1:1	40	0.0203	0.0142
0.61	0.55	1:1	50	0.0217	0.0158
0.61	0.55	1:1	60	0.0175	0.015
0.61	0.55	1:1	80	0.0177	0.0136
0.61	0.55	1:1	100	0.0152	0.0122
0.62	0.55	1:1	20	0.0322	0.0219
0.62	0.55	1:1	30	0.0212	0.0169
0.62	0.55	1:1	40	0.0205	0.0147
0.62	0.55	1:1	50	0.0199	0.0145
0.62	0.55	1:1	60	0.0172	0.0129
0.62	0.55	1:1	80	0.0168	0.0128
0.62	0.55	1:1	100	0.0165	0.013
0.63	0.55	1:1	20	0.0321	0.0264
0.63	0.55	1:1	30	0.027	0.0186
0.63	0.55	1:1	40	0.02	0.0136
0.63	0.55	1:1	50	0.0175	0.0136
0.63	0.55	1:1	60	0.0194	0.0154
0.63	0.55	1:1	80	0.0158	0.0123
0.63	0.55	1:1	100	0.0162	0.0129
0.64	0.55	1:1	20	0.035	0.0228
0.64	0.55	1:1	30	0.0273	0.0211
0.64	0.55	1:1	40	0.0214	0.015
0.64	0.55	1:1	50	0.0209	0.0158
0.64	0.55	1:1	60	0.0193	0.0151
0.64	0.55	1:1	80	0.0164	0.0131
0.64	0.55	1:1	100	0.0159	0.0117
0.65	0.55	1:1	20	0.0339	0.0254
0.65	0.55	1:1	30	0.0288	0.0195
0.65	0.55	1:1	40	0.025	0.0182
0.65	0.55	1:1	50	0.0221	0.0171
0.65	0.55	1:1	60	0.0194	0.0139
0.65	0.55	1:1	80	0.0158	0.0117
0.65	0.55	1:1	100	0.0165	0.0134
0.66	0.55	1:1	20	0.0379	0.0244
0.66	0.55	1:1	30	0.0272	0.0224
0.66	0.55	1:1	40	0.0226	0.018
0.66	0.55	1:1	50	0.0236	0.0171
0.66	0.55	1:1	60	0.0197	0.0145
0.66	0.55	1:1	80	0.0159	0.0123
0.66	0.55	1:1	100	0.0176	0.0145
0.67	0.55	1:1	20	0.04	0.0312
0.67	0.55	1:1	30	0.0309	0.0196
0.67	0.55	1:1	40	0.0236	0.0187
0.67	0.55	1:1	50	0.0221	0.0151
0.67	0.55	1:1	60	0.0202	0.0159
0.67	0.55	1:1	80	0.0171	0.0143
0.67	0.55	1:1	100	0.0177	0.0145
0.68	0.55	1:1	20	0.0344	0.0262
0.68	0.55	1:1	30	0.0287	0.0225
0.68	0.55	1:1	40	0.0266	0.0195
0.68	0.55	1:1	50	0.0204	0.0148
0.68	0.55	1:1	60	0.0177	0.0133
0.68	0.55	1:1	80	0.0178	0.0138
0.68	0.55	1:1	100	0.0184	0.0151
0.69	0.55	1:1	20	0.0398	0.0231
0.69	0.55	1:1	30	0.0339	0.0238
0.69	0.55	1:1	40	0.0247	0.017
0.69	0.55	1:1	50	0.0195	0.016
0.69	0.55	1:1	60	0.0192	0.0155
0.69	0.55	1:1	80	0.0174	0.0136
0.69	0.55	1:1	100	0.0157	0.0127
0.7	0.55	1:1	20	0.0416	0.0315
0.7	0.55	1:1	30	0.0311	0.024
0.7	0.55	1:1	40	0.0247	0.0164
0.7	0.55	1:1	50	0.0244	0.0188
0.7	0.55	1:1	60	0.0192	0.0149
0.7	0.55	1:1	80	0.0165	0.0123
0.7	0.55	1:1	100	0.0188	0.0147
0.71	0.55	1:1	20	0.0451	0.0265
0.71	0.55	1:1	30	0.0359	0.0237
0.71	0.55	1:1	40	0.0295	0.0212
0.71	0.55	1:1	50	0.0214	0.0173
0.71	0.55	1:1	60	0.0212	0.0155
0.71	0.55	1:1	80	0.0183	0.0148
0.71	0.55	1:1	100	0.0183	0.0153
0.72	0.55	1:1	20	0.042	0.0319
0.72	0.55	1:1	30	0.0322	0.0242
0.72	0.55	1:1	40	0.0264	0.021
0.72	0.55	1:1	50	0.0237	0.0171
0.72	0.55	1:1	60	0.0252	0.0189
0.72	0.55	1:1	80	0.0177	0.0138
0.72	0.55	1:1	100	0.0158	0.012
0.73	0.55	1:1	20	0.0491	0.0295
0.73	0.55	1:1	30	0.0373	0.0273
0.73	0.55	1:1	40	0.0294	0.0239
0.73	0.55	1:1	50	0.0232	0.0171
0.73	0.55	1:1	60	0.0212	0.0148
0.73	0.55	1:1	80	0.0186	0.0151
0.73	0.55	1:1	100	0.0161	0.0131
0.74	0.55	1:1	20	0.0467	0.0357
0.74	0.55	1:1	30	0.0308	0.0231
0.74	0.55	1:1	40	0.0286	0.02
0.74	0.55	1:1	50	0.022	0.0147
0.74	0.55	1:1	60	0.0233	0.0189
0.74	0.55	1:1	80	0.0216	0.0175
0.74	0.55	1:1	100	0.0176	0.0132
0.75	0.55	1:1	20	0.057	0.0341
0.75	0.55	1:1	30	0.0364	0.0263
0.75	0.55	1:1	40	0.0278	0.021
0.75	0.55	1:1	50	0.0255	0.0192
0.75	0.55	1:1	60	0.0245	0.0178
0.75	0.55	1:1	80	0.022	0.0168
0.75	0.55	1:1	100	0.0183	0.0135
0.76	0.55	1:1	20	0.0487	0.0369
0.76	0.55	1:1	30	0.0372	0.027
0.76	0.55	1:1	40	0.0305	0.0214
0.76	0.55	1:1	50	0.0245	0.0179
0.76	0.55	1:1	60	0.0225	0.0179
0.76	0.55	1:1	80	0.0227	0.0165
0.76	0.55	1:1	100	0.0188	0.0143
0.77	0.55	1:1	20	0.0601	0.0327
0.77	0.55	1:1	30	0.0313	0.0223
0.77	0.55	1:1	40	0.0292	0.0212
0.77	0.55	1:1	50	0.024	0.0164
0.77	0.55	1:1	60	0.0251	0.0177
0.77	0.55	1:1	80	0.0215	0.0153
0.77	0.55	1:1	100	0.0178	0.0149
0.78	0.55	1:1	20	0.0491	0.0356
0.78	0.55	1:1	30	0.0403	0.0284
0.78	0.55	1:1	40	0.028	0.0209
0.78	0.55	1:1	50	0.0258	0.0191
0.78	0.55	1:1	60	0.0235	0.0154
0.78	0.55	1:1	80	0.0205	0.0162
0.78	0.55	1:1	100	0.0191	0.0147
0.79	0.55	1:1	20	0.0602	0.032
0.79	0.55	1:1	30	0.0389	0.0289
0.79	0.55	1:1	40	0.0325	0.0229
0.79	0.55	1:1	50	0.0271	0.0204
0.79	0.55	1:1	60	0.0218	0.016
0.79	0.55	1:1	80	0.022	0.0165
0.79	0.55	1:1	100	0.0195	0.0152
0.8	0.55	1:1	20	0.0566	0.0432
0.8	0.55	1:1	30	0.0448	0.0323
0.8	0.55	1:1	40	0.027	0.0195
0.8	0.55	1:1	50	0.0272	0.0185
0.8	0.55	1:1	60	0.0256	0.0186
0.8	0.55	1:1	80	0.0203	0.0162
0.8	0.55	1:1	100	0.0173	0.0129
0.81	0.55	1:1	20	0.0619	0.0436
0.81	0.55	1:1	30	0.0435	0.0287
0.81	0.55	1:1	40	0.0323	0.0232
0.81	0.55	1:1	50	0.0272	0.0195
0.81	0.55	1:1	60	0.0254	0.0189
0.81	0.55	1:1	80	0.021	0.0147
0.81	0.55	1:1	100	0.0194	0.0148
0.82	0.55	1:1	20	0.0582	0.0411
0.82	0.55	1:1	30	0.0411	0.0282
0.82	0.55	1:1	40	0.0325	0.022
0.82	0.55	1:1	50	0.0267	0.0195
0.82	0.55	1:1	60	0.0272	0.0192
0.82	0.55	1:1	80	0.021	0.0164
0.82	0.55	1:1	100	0.0177	0.013
0.83	0.55	1:1	20	0.0728	0.051
0.83	0.55	1:1	30	0.0443	0.0308
0.83	0.55	1:1	40	0.031	0.0237
0.83	0.55	1:1	50	0.0274	0.0215
0.83	0.55	1:1	60	0.0263	0.0172
0.83	0.55	1:1	80	0.0209	0.0155
0.83	0.55	1:1	100	0.0189	0.0142
0.84	0.55	1:1	20	0.0638	0.0438
0.84	0.55	1:1	30	0.0513	0.0343
0.84	0.55	1:1	40	0.0345	0.0225
0.84	0.55	1:1	50	0.0315	0.0201
0.84	0.55	1:1	60	0.0269	0.0212
0.84	0.55	1:1	80	0.0212	0.016
0.84	0.55	1:1	100	0.0191	0.0155
0.85	0.55	1:1	20	0.0751	0.0536
0.85	0.55	1:1	30	0.0509	0.0312
0.85	0.55	1:1	40	0.0386	0.0246
0.85	0.55	1:1	50	0.0324	0.0232
0.85	0.55	1:1	60	0.0248	0.0175
0.85	0.55	1:1	80	0.0241	0.018
0.85	0.55	1:1	100	0.0196	0.0155
0.86	0.55	1:1	20	0.0926	0.0655
0.86	0.55	1:1	30	0.0547	0.0354
0.86	0.55	1:1	40	0.0413	0.0252
0.86	0.55	1:1	50	0.0292	0.0222
0.86	0.55	1:1	60	0.0252	0.0189
0.86	0.55	1:1	80	0.0205	0.0143
0.86	0.55	1:1	100	0.0202	0.0147
0.87	0.55	1:1	20	0.0768	0.051
0.87	0.55	1:1	30	0.0565	0.0351
0.87	0.55	1:1	40	0.0445	0.029
0.87	0.55	1:1	50	0.0331	0.0218
0.87	0.55	1:1	60	0.0284	0.0176
0.87	0.55	1:1	80	0.0244	0.0162
0.87	0.55	1:1	100	0.02	0.0147
0.88	0.55	1:1	20	0.0931	0.0589
0.88	0.55	1:1	30	0.062	0.0394
0.88	0.55	1:1	40	0.0451	0.0282
0.88	0.55	1:1	50	0.0298	0.0203
0.88	0.55	1:1	60	0.0325	0.0203
0.88	0.55	1:1	80	0.0196	0.0124
0.88	0.55	1:1	100	0.0177	0.0119
0.89	0.55	1:1	20	0.1157	0.074
0.89	0.55	1:1	30	0.0637	0.0374
0.89	0.55	1:1	40	0.0458	0.0324
0.89	0.55	1:1	50	0.0318	0.022
0.89	0.55	1:1	60	0.0316	0.0195
0.89	0.55	1:1	80	0.0229	0.0161
0.89	0.55	1:1	100	0.0204	0.0144
0.9	0.55	1:1	20	0.0907	0.0907
0.9	0.55	1:1	30	0.0644	0.0367
0.9	0.55	1:1	40	0.0478	0.0333
0.9	0.55	1:1	50	0.0399	0.0267
0.9	0.55	1:1	60	0.0304	0.0203
0.9	0.55	1:1	80	0.0245	0.016
0.9	0.55	1:1	100	0.0211	0.0146
0.6	0.56	1:1	20	0.0265	0.0217
0.6	0.56	1:1	30	0.0252	0.0182
0.6	0.56	1:1	40	0.0215	0.0147
0.6	0.56	1:1	50	0.0199	0.0148
0.6	0.56	1:1	60	0.0189	0.014
0.6	0.56	1:1	80	0.0146	0.0115
0.6	0.56	1:1	100	0.0176	0.0146
0.61	0.56	1:1	20	0.0321	0.0203
0.61	0.56	1:1	30	0.0243	0.0187
0.61	0.56	1:1	40	0.0237	0.0173
0.61	0.56	1:1	50	0.0209	0.0164
0.61	0.56	1:1	60	0.0171	0.0125
0.61	0.56	1:1	80	0.0177	0.0147
0.61	0.56	1:1	100	0.0163	0.0129
0.62	0.56	1:1	20	0.0305	0.0244
0.62	0.56	1:1	30	0.0298	0.0212
0.62	0.56	1:1	40	0.0222	0.0176
0.62	0.56	1:1	50	0.023	0.0174
0.62	0.56	1:1	60	0.0186	0.014
0.62	0.56	1:1	80	0.0192	0.0145
0.62	0.56	1:1	100	0.0166	0.0137
0.63	0.56	1:1	20	0.0369	0.0235
0.63	0.56	1:1	30	0.025	0.0165
0.63	0.56	1:1	40	0.0244	0.0174
0.63	0.56	1:1	50	0.0228	0.0164
0.63	0.56	1:1	60	0.0208	0.0161
0.63	0.56	1:1	80	0.0175	0.0134
0.63	0.56	1:1	100	0.0139	0.011
0.64	0.56	1:1	20	0.0364	0.0225
0.64	0.56	1:1	30	0.03	0.0211
0.64	0.56	1:1	40	0.0244	0.0177
0.64	0.56	1:1	50	0.0214	0.0163
0.64	0.56	1:1	60	0.0221	0.0174
0.64	0.56	1:1	80	0.0181	0.0136
0.64	0.56	1:1	100	0.0189	0.0149
0.65	0.56	1:1	20	0.0291	0.023
0.65	0.56	1:1	30	0.0283	0.0185
0.65	0.56	1:1	40	0.0283	0.0203
0.65	0.56	1:1	50	0.0202	0.015
0.65	0.56	1:1	60	0.021	0.0168
0.65	0.56	1:1	80	0.0163	0.0133
0.65	0.56	1:1	100	0.0175	0.0149
0.66	0.56	1:1	20	0.0415	0.0261
0.66	0.56	1:1	30	0.0279	0.0208
0.66	0.56	1:1	40	0.0275	0.0212
0.66	0.56	1:1	50	0.0225	0.0162
0.66	0.56	1:1	60	0.0209	0.0163
0.66	0.56	1:1	80	0.0178	0.0138
0.66	0.56	1:1	100	0.0172	0.014
0.67	0.56	1:1	20	0.0398	0.031
0.67	0.56	1:1	30	0.0272	0.0178
0.67	0.56	1:1	40	0.0251	0.0169
0.67	0.56	1:1	50	0.0211	0.0154
0.67	0.56	1:1	60	0.0196	0.0151
0.67	0.56	1:1	80	0.0175	0.0142
0.67	0.56	1:1	100	0.0159	0.0124
0.68	0.56	1:1	20	0.0459	0.0297
0.68	0.56	1:1	30	0.0293	0.0221
0.68	0.56	1:1	40	0.0258	0.0178
0.68	0.56	1:1	50	0.023	0.0171
0.68	0.56	1:1	60	0.0216	0.0162
0.68	0.56	1:1	80	0.0181	0.0137
0.68	0.56	1:1	100	0.0177	0.0138
0.69	0.56	1:1	20	0.0417	0.0324
0.69	0.56	1:1	30	0.0279	0.0184
0.69	0.56	1:1	40	0.0281	0.0198
0.69	0.56	1:1	50	0.0236	0.0181
0.69	0.56	1:1	60	0.021	0.0163
0.69	0.56	1:1	80	0.0196	0.0146
0.69	0.56	1:1	100	0.0177	0.0137
0.7	0.56	1:1	20	0.042	0.032
0.7	0.56	1:1	30	0.0272	0.0208
0.7	0.56	1:1	40	0.0269	0.0202
0.7	0.56	1:1	50	0.0227	0.0178
0.7	0.56	1:1	60	0.0214	0.0157
0.7	0.56	1:1	80	0.018	0.0136
0.7	0.56	1:1	100	0.0185	0.0151
0.71	0.56	1:1	20	0.0449	0.0268
0.71	0.56	1:1	30	0.0313	0.0237
0.71	0.56	1:1	40	0.0254	0.0189
0.71	0.56	1:1	50	0.0247	0.0184
0.71	0.56	1:1	60	0.0212	0.0164
0.71	0.56	1:1	80	0.0181	0.0143
0.71	0.56	1:1	100	0.0178	0.0135
0.72	0.56	1:1	20	0.0388	0.0305
0.72	0.56	1:1	30	0.0314	0.0247
0.72	0.56	1:1	40	0.0289	0.0199
0.72	0.56	1:1	50	0.0225	0.0178
0.72	0.56	1:1	60	0.0227	0.0154
0.72	0.56	1:1	80	0.0194	0.0154
0.72	0.56	1:1	100	0.0169	0.0139
0.73	0.56	1:1	20	0.0534	0.0305
0.73	0.56	1:1	30	0.0351	0.0254
0.73	0.56	1:1	40	0.027	0.0191
0.73	0.56	1:1	50	0.0248	0.0178
0.73	0.56	1:1	60	0.0249	0.0175
0.73	0.56	1:1	80	0.02	0.0154
0.73	0.56	1:1	100	0.0196	0.016
0.74	0.56	1:1	20	0.048	0.0365
0.74	0.56	1:1	30	0.0383	0.0234
0.74	0.56	1:1	40	0.0285	0.0208
0.74	0.56	1:1	50	0.0216	0.0153
0.74	0.56	1:1	60	0.0229	0.0175
0.74	0.56	1:1	80	0.0221	0.0181
0.74	0.56	1:1	100	0.018	0.0135
0.75	0.56	1:1	20	0.0535	0.0319
0.75	0.56	1:1	30	0.0328	0.0228
0.75	0.56	1:1	40	0.0312	0.0212
0.75	0.56	1:1	50	0.0247	0.0173
0.75	0.56	1:1	60	0.0214	0.0161
0.75	0.56	1:1	80	0.0246	0.0196
0.75	0.56	1:1	100	0.0201	0.0163
0.76	0.56	1:1	20	0.0495	0.0381
0.76	0.56	1:1	30	0.0352	0.027
0.76	0.56	1:1	40	0.0303	0.0222
0.76	0.56	1:1	50	0.0241	0.0168
0.76	0.56	1:1	60	0.024	0.0189
0.76	0.56	1:1	80	0.021	0.0165
0.76	0.56	1:1	100	0.0189	0.0152
0.77	0.56	1:1	20	0.0569	0.0317
0.77	0.56	1:1	30	0.0374	0.023
0.77	0.56	1:1	40	0.0329	0.0241
0.77	0.56	1:1	50	0.0281	0.0206
0.77	0.56	1:1	60	0.0226	0.016
0.77	0.56	1:1	80	0.021	0.015
0.77	0.56	1:1	100	0.0187	0.0144
0.78	0.56	1:1	20	0.0532	0.038
0.78	0.56	1:1	30	0.0357	0.0249
0.78	0.56	1:1	40	0.0329	0.0236
0.78	0.56	1:1	50	0.028	0.0205
0.78	0.56	1:1	60	0.024	0.0176
0.78	0.56	1:1	80	0.0224	0.0171
0.78	0.56	1:1	100	0.0193	0.0139
0.79	0.56	1:1	20	0.0637	0.0467
0.79	0.56	1:1	30	0.0363	0.0264
0.79	0.56	1:1	40	0.032	0.0234
0.79	0.56	1:1	50	0.0292	0.0219
0.79	0.56	1:1	60	0.0234	0.0171
0.79	0.56	1:1	80	0.0217	0.0164
0.79	0.56	1:1	100	0.0182	0.0149
0.8	0.56	1:1	20	0.0567	0.041
0.8	0.56	1:1	30	0.044	0.031
0.8	0.56	1:1	40	0.0336	0.0232
0.8	0.56	1:1	50	0.0288	0.0213
0.8	0.56	1:1	60	0.0259	0.019
0.8	0.56	1:1	80	0.0181	0.0133
0.8	0.56	1:1	100	0.0168	0.0125
0.81	0.56	1:1	20	0.0638	0.0458
0.81	0.56	1:1	30	0.0495	0.0346
0.81	0.56	1:1	40	0.035	0.0223
0.81	0.56	1:1	50	0.0294	0.0215
0.81	0.56	1:1	60	0.0253	0.0196
0.81	0.56	1:1	80	0.0201	0.0142
0.81	0.56	1:1	100	0.0187	0.0148
0.82	0.56	1:1	20	0.0571	0.0383
0.82	0.56	1:1	30	0.0417	0.0285
0.82	0.56	1:1	40	0.0345	0.0242
0.82	0.56	1:1	50	0.0299	0.0205
0.82	0.56	1:1	60	0.0273	0.0201
0.82	0.56	1:1	80	0.0209	0.0162
0.82	0.56	1:1	100	0.0194	0.0143
0.83	0.56	1:1	20	0.0696	0.0495
0.83	0.56	1:1	30	0.0429	0.0285
0.83	0.56	1:1	40	0.0383	0.0278
0.83	0.56	1:1	50	0.0339	0.0242
0.83	0.56	1:1	60	0.0287	0.0198
0.83	0.56	1:1	80	0.0222	0.0152
0.83	0.56	1:1	100	0.0192	0.0137
0.84	0.56	1:1	20	0.0613	0.0613
0.84	0.56	1:1	30	0.0454	0.0301
0.84	0.56	1:1	40	0.0369	0.0292
0.84	0.56	1:1	50	0.0316	0.023
0.84	0.56	1:1	60	0.0257	0.0181
0.84	0.56	1:1	80	0.0225	0.0165
0.84	0.56	1:1	100	0.0183	0.0138
0.85	0.56	1:1	20	0.0717	0.0487
0.85	0.56	1:1	30	0.0518	0.035
0.85	0.56	1:1	40	0.0369	0.0245
0.85	0.56	1:1	50	0.0327	0.0235
0.85	0.56	1:1	60	0.0282	0.0198
0.85	0.56	1:1	80	0.0239	0.0175
0.85	0.56	1:1	100	0.0184	0.0137
0.86	0.56	1:1	20	0.0906	0.0629
0.86	0.56	1:1	30	0.0521	0.0346
0.86	0.56	1:1	40	0.0392	0.0252
0.86	0.56	1:1	50	0.0318	0.0213
0.86	0.56	1:1	60	0.0275	0.0181
0.86	0.56	1:1	80	0.021	0.0149
0.86	0.56	1:1	100	0.0185	0.013
0.87	0.56	1:1	20	0.0808	0.0495
0.87	0.56	1:1	30	0.0591	0.0374
0.87	0.56	1:1	40	0.0429	0.0267
0.87	0.56	1:1	50	0.0341	0.0247
0.87	0.56	1:1	60	0.0298	0.0208
0.87	0.56	1:1	80	0.022	0.0148
0.87	0.56	1:1	100	0.0192	0.0135
0.88	0.56	1:1	20	0.0952	0.0602
0.88	0.56	1:1	30	0.0577	0.035
0.88	0.56	1:1	40	0.0437	0.0258
0.88	0.56	1:1	50	0.0358	0.0233
0.88	0.56	1:1	60	0.0301	0.0203
0.88	0.56	1:1	80	0.0235	0.0173
0.88	0.56	1:1	100	0.021	0.0154
0.89	0.56	1:1	20	0.1124	0.0707
0.89	0.56	1:1	30	0.0603	0.0343
0.89	0.56	1:1	40	0.0441	0.032
0.89	0.56	1:1	50	0.0336	0.0231
0.89	0.56	1:1	60	0.0299	0.0211
0.89	0.56	1:1	80	0.0228	0.0165
0.89	0.56	1:1	100	0.0224	0.016
0.9	0.56	1:1	20	0.0895	0.0895
0.9	0.56	1:1	30	0.0666	0.0506
0.9	0.56	1:1	40	0.0461	0.0317
0.9	0.56	1:1	50	0.0397	0.0286
0.9	0.56	1:1	60	0.0342	0.0226
0.9	0.56	1:1	80	0.0227	0.0143
0.9	0.56	1:1	100	0.0215	0.0147
0.6	0.57	1:1	20	0.035	0.0221
0.6	0.57	1:1	30	0.0273	0.0213
0.6	0.57	1:1	40	0.0215	0.0171
0.6	0.57	1:1	50	0.0202	0.0152
0.6	0.57	1:1	60	0.0192	0.0142
0.6	0.57	1:1	80	0.0159	0.0127
0.6	0.57	1:1	100	0.0166	0.0137
0.61	0.57	1:1	20	0.0349	0.0222
0.61	0.57	1:1	30	0.027	0.0195
0.61	0.57	1:1	40	0.0215	0.0161
0.61	0.57	1:1	50	0.0208	0.0157
0.61	0.57	1:1	60	0.0193	0.0156
0.61	0.57	1:1	80	0.017	0.0136
0.61	0.57	1:1	100	0.0161	0.0124
0.62	0.57	1:1	20	0.0329	0.0262
0.62	0.57	1:1	30	0.026	0.0182
0.62	0.57	1:1	40	0.0232	0.0165
0.62	0.57	1:1	50	0.0209	0.0161
0.62	0.57	1:1	60	0.0221	0.0169
0.62	0.57	1:1	80	0.0162	0.0132
0.62	0.57	1:1	100	0.0157	0.0129
0.63	0.57	1:1	20	0.0374	0.0231
0.63	0.57	1:1	30	0.0283	0.0229
0.63	0.57	1:1	40	0.0251	0.0189
0.63	0.57	1:1	50	0.023	0.0164
0.63	0.57	1:1	60	0.0219	0.0176
0.63	0.57	1:1	80	0.0191	0.0138
0.63	0.57	1:1	100	0.0161	0.0127
0.64	0.57	1:1	20	0.0359	0.0288
0.64	0.57	1:1	30	0.0297	0.021
0.64	0.57	1:1	40	0.0232	0.0175
0.64	0.57	1:1	50	0.0226	0.0168
0.64	0.57	1:1	60	0.0215	0.017
0.64	0.57	1:1	80	0.0187	0.0155
0.64	0.57	1:1	100	0.0165	0.014
0.65	0.57	1:1	20	0.0334	0.0271
0.65	0.57	1:1	30	0.0229	0.0183
0.65	0.57	1:1	40	0.025	0.018
0.65	0.57	1:1	50	0.0223	0.016
0.65	0.57	1:1	60	0.0199	0.0149
0.65	0.57	1:1	80	0.0187	0.0139
0.65	0.57	1:1	100	0.0174	0.014
0.66	0.57	1:1	20	0.0374	0.0243
0.66	0.57	1:1	30	0.0286	0.0188
0.66	0.57	1:1	40	0.0251	0.0185
0.66	0.57	1:1	50	0.0231	0.0185
0.66	0.57	1:1	60	0.0195	0.0154
0.66	0.57	1:1	80	0.0209	0.0156
0.66	0.57	1:1	100	0.0167	0.0134
0.67	0.57	1:1	20	0.0368	0.0302
0.67	0.57	1:1	30	0.0295	0.0237
0.67	0.57	1:1	40	0.025	0.019
0.67	0.57	1:1	50	0.0225	0.0163
0.67	0.57	1:1	60	0.0226	0.0172
0.67	0.57	1:1	80	0.0186	0.0141
0.67	0.57	1:1	100	0.0193	0.0153
0.68	0.57	1:1	20	0.0484	0.0301
0.68	0.57	1:1	30	0.032	0.0214
0.68	0.57	1:1	40	0.0257	0.0195
0.68	0.57	1:1	50	0.0216	0.0171
0.68	0.57	1:1	60	0.0235	0.0189
0.68	0.57	1:1	80	0.0193	0.0139
0.68	0.57	1:1	100	0.018	0.0142
0.69	0.57	1:1	20	0.0396	0.0306
0.69	0.57	1:1	30	0.0288	0.0227
0.69	0.57	1:1	40	0.0271	0.0229
0.69	0.57	1:1	50	0.0228	0.017
0.69	0.57	1:1	60	0.0227	0.0167
0.69	0.57	1:1	80	0.0196	0.015
0.69	0.57	1:1	100	0.0179	0.0146
0.7	0.57	1:1	20	0.0397	0.0308
0.7	0.57	1:1	30	0.0358	0.0245
0.7	0.57	1:1	40	0.0273	0.0195
0.7	0.57	1:1	50	0.023	0.0176
0.7	0.57	1:1	60	0.0253	0.0198
0.7	0.57	1:1	80	0.0208	0.0168
0.7	0.57	1:1	100	0.0199	0.0158
0.71	0.57	1:1	20	0.0445	0.0333
0.71	0.57	1:1	30	0.0349	0.0254
0.71	0.57	1:1	40	0.0291	0.022
0.71	0.57	1:1	50	0.0243	0.0191
0.71	0.57	1:1	60	0.0211	0.0162
0.71	0.57	1:1	80	0.0208	0.0164
0.71	0.57	1:1	100	0.0178	0.0136
0.72	0.57	1:1	20	0.0434	0.0343
0.72	0.57	1:1	30	0.0351	0.0242
0.72	0.57	1:1	40	0.0253	0.017
0.72	0.57	1:1	50	0.0271	0.0192
0.72	0.57	1:1	60	0.0215	0.0157
0.72	0.57	1:1	80	0.0183	0.0137
0.72	0.57	1:1	100	0.0195	0.0159
0.73	0.57	1:1	20	0.0483	0.0376
0.73	0.57	1:1	30	0.0359	0.0261
0.73	0.57	1:1	40	0.0283	0.0218
0.73	0.57	1:1	50	0.0246	0.0194
0.73	0.57	1:1	60	0.0269	0.0193
0.73	0.57	1:1	80	0.0205	0.016
0.73	0.57	1:1	100	0.0202	0.0163
0.74	0.57	1:1	20	0.0428	0.0312
0.74	0.57	1:1	30	0.0335	0.0254
0.74	0.57	1:1	40	0.0308	0.0232
0.74	0.57	1:1	50	0.025	0.0176
0.74	0.57	1:1	60	0.0231	0.0178
0.74	0.57	1:1	80	0.0208	0.0165
0.74	0.57	1:1	100	0.0173	0.0127
0.75	0.57	1:1	20	0.0499	0.0285
0.75	0.57	1:1	30	0.0363	0.0259
0.75	0.57	1:1	40	0.0311	0.0212
0.75	0.57	1:1	50	0.0267	0.0198
0.75	0.57	1:1	60	0.0232	0.0174
0.75	0.57	1:1	80	0.0194	0.0151
0.75	0.57	1:1	100	0.0186	0.0144
0.76	0.57	1:1	20	0.048	0.0381
0.76	0.57	1:1	30	0.0388	0.0284
0.76	0.57	1:1	40	0.0314	0.0233
0.76	0.57	1:1	50	0.0261	0.0188
0.76	0.57	1:1	60	0.0258	0.0192
0.76	0.57	1:1	80	0.0221	0.018
0.76	0.57	1:1	100	0.0193	0.0149
0.77	0.57	1:1	20	0.0588	0.0435
0.77	0.57	1:1	30	0.045	0.0323
0.77	0.57	1:1	40	0.0333	0.0227
0.77	0.57	1:1	50	0.028	0.02
0.77	0.57	1:1	60	0.0247	0.0191
0.77	0.57	1:1	80	0.019	0.0151
0.77	0.57	1:1	100	0.0189	0.0145
0.78	0.57	1:1	20	0.0501	0.0367
0.78	0.57	1:1	30	0.038	0.0276
0.78	0.57	1:1	40	0.0321	0.0236
0.78	0.57	1:1	50	0.0245	0.0173
0.78	0.57	1:1	60	0.0249	0.0188
0.78	0.57	1:1	80	0.0211	0.0161
0.78	0.57	1:1	100	0.0179	0.0149
0.79	0.57	1:1	20	0.0605	0.0439
0.79	0.57	1:1	30	0.0382	0.0281
0.79	0.57	1:1	40	0.0323	0.0225
0.79	0.57	1:1	50	0.0257	0.0197
0.79	0.57	1:1	60	0.0242	0.0179
0.79	0.57	1:1	80	0.0233	0.0175
0.79	0.57	1:1	100	0.02	0.0142
0.8	0.57	1:1	20	0.0622	0.0456
0.8	0.57	1:1	30	0.0428	0.031
0.8	0.57	1:1	40	0.0312	0.0229
0.8	0.57	1:1	50	0.0285	0.0204
0.8	0.57	1:1	60	0.0274	0.0205
0.8	0.57	1:1	80	0.0241	0.0187
0.8	0.57	1:1	100	0.019	0.0141
0.81	0.57	1:1	20	0.0689	0.0513
0.81	0.57	1:1	30	0.0431	0.032
0.81	0.57	1:1	40	0.0363	0.0269
0.81	0.57	1:1	50	0.0291	0.0195
0.81	0.57	1:1	60	0.0243	0.017
0.81	0.57	1:1	80	0.0214	0.016
0.81	0.57	1:1	100	0.0188	0.0127
0.82	0.57	1:1	20	0.0552	0.0396
0.82	0.57	1:1	30	0.0428	0.036
0.82	0.57	1:1	40	0.0373	0.0257
0.82	0.57	1:1	50	0.0315	0.0213
0.82	0.57	1:1	60	0.0249	0.0188
0.82	0.57	1:1	80	0.0271	0.0202
0.82	0.57	1:1	100	0.0204	0.0161
0.83	0.57	1:1	20	0.0692	0.0484
0.83	0.57	1:1	30	0.0434	0.03
0.83	0.57	1:1	40	0.0394	0.0276
0.83	0.57	1:1	50	0.0299	0.0208
0.83	0.57	1:1	60	0.0261	0.0193
0.83	0.57	1:1	80	0.0254	0.0197
0.83	0.57	1:1	100	0.0223	0.0175
0.84	0.57	1:1	20	0.0849	0.0618
0.84	0.57	1:1	30	0.0493	0.0316
0.84	0.57	1:1	40	0.0417	0.0282
0.84	0.57	1:1	50	0.0327	0.021
0.84	0.57	1:1	60	0.0267	0.0188
0.84	0.57	1:1	80	0.0223	0.0172
0.84	0.57	1:1	100	0.0184	0.0137
0.85	0.57	1:1	20	0.0757	0.0549
0.85	0.57	1:1	30	0.0514	0.0344
0.85	0.57	1:1	40	0.037	0.027
0.85	0.57	1:1	50	0.0321	0.0244
0.85	0.57	1:1	60	0.0305	0.0196
0.85	0.57	1:1	80	0.0216	0.0166
0.85	0.57	1:1	100	0.0189	0.0131
0.86	0.57	1:1	20	0.0911	0.064
0.86	0.57	1:1	30	0.0487	0.0304
0.86	0.57	1:1	40	0.0403	0.0301
0.86	0.57	1:1	50	0.0348	0.0229
0.86	0.57	1:1	60	0.0277	0.0206
0.86	0.57	1:1	80	0.0231	0.0158
0.86	0.57	1:1	100	0.0207	0.0149
0.87	0.57	1:1	20	0.0735	0.0452
0.87	0.57	1:1	30	0.0567	0.0335
0.87	0.57	1:1	40	0.0425	0.0313
0.87	0.57	1:1	50	0.0349	0.0255
0.87	0.57	1:1	60	0.0295	0.0184
0.87	0.57	1:1	80	0.0209	0.0145
0.87	0.57	1:1	100	0.0204	0.014
0.88	0.57	1:1	20	0.0885	0.0567
0.88	0.57	1:1	30	0.0605	0.0361
0.88	0.57	1:1	40	0.044	0.0331
0.88	0.57	1:1	50	0.037	0.0237
0.88	0.57	1:1	60	0.0288	0.0213
0.88	0.57	1:1	80	0.0251	0.018
0.88	0.57	1:1	100	0.0215	0.0141
0.89	0.57	1:1	20	0.1139	0.0767
0.89	0.57	1:1	30	0.059	0.0348
0.89	0.57	1:1	40	0.0491	0.0338
0.89	0.57	1:1	50	0.0369	0.0252
0.89	0.57	1:1	60	0.0341	0.0242
0.89	0.57	1:1	80	0.0268	0.0163
0.89	0.57	1:1	100	0.0219	0.0162
0.9	0.57	1:1	20	0.0972	0.0972
0.9	0.57	1:1	30	0.064	0.0487
0.9	0.57	1:1	40	0.0435	0.0298
0.9	0.57	1:1	50	0.0421	0.0293
0.9	0.57	1:1	60	0.0312	0.021
0.9	0.57	1:1	80	0.0248	0.016
0.9	0.57	1:1	100	0.0215	0.0144
0.6	0.58	1:1	20	0.03	0.0202
0.6	0.58	1:1	30	0.027	0.0188
0.6	0.58	1:1	40	0.0222	0.0166
0.6	0.58	1:1	50	0.0219	0.0173
0.6	0.58	1:1	60	0.0211	0.016
0.6	0.58	1:1	80	0.0198	0.016
0.6	0.58	1:1	100	0.0176	0.0145
0.61	0.58	1:1	20	0.0336	0.0268
0.61	0.58	1:1	30	0.0289	0.0199
0.61	0.58	1:1	40	0.0245	0.0183
0.61	0.58	1:1	50	0.0206	0.0161
0.61	0.58	1:1	60	0.0188	0.0136
0.61	0.58	1:1	80	0.0196	0.015
0.61	0.58	1:1	100	0.0184	0.016
0.62	0.58	1:1	20	0.0304	0.0239
0.62	0.58	1:1	30	0.0266	0.0223
0.62	0.58	1:1	40	0.0259	0.0181
0.62	0.58	1:1	50	0.0209	0.0154
0.62	0.58	1:1	60	0.0198	0.0144
0.62	0.58	1:1	80	0.02	0.0162
0.62	0.58	1:1	100	0.0176	0.014
0.63	0.58	1:1	20	0.0383	0.0243
0.63	0.58	1:1	30	0.0291	0.0201
0.63	0.58	1:1	40	0.0217	0.0169
0.63	0.58	1:1	50	0.024	0.0177
0.63	0.58	1:1	60	0.0192	0.015
0.63	0.58	1:1	80	0.0193	0.016
0.63	0.58	1:1	100	0.017	0.0131
0.64	0.58	1:1	20	0.0391	0.0315
0.64	0.58	1:1	30	0.0285	0.0204
0.64	0.58	1:1	40	0.0255	0.0195
0.64	0.58	1:1	50	0.023	0.017
0.64	0.58	1:1	60	0.0206	0.0159
0.64	0.58	1:1	80	0.0178	0.014
0.64	0.58	1:1	100	0.018	0.0156
0.65	0.58	1:1	20	0.0434	0.0284
0.65	0.58	1:1	30	0.0287	0.0212
0.65	0.58	1:1	40	0.0266	0.02
0.65	0.58	1:1	50	0.0226	0.018
0.65	0.58	1:1	60	0.0231	0.0187
0.65	0.58	1:1	80	0.022	0.0174
0.65	0.58	1:1	100	0.0209	0.0169
0.66	0.58	1:1	20	0.0417	0.0261
0.66	0.58	1:1	30	0.0299	0.0205
0.66	0.58	1:1	40	0.026	0.0173
0.66	0.58	1:1	50	0.0228	0.0178
0.66	0.58	1:1	60	0.0202	0.0155
0.66	0.58	1:1	80	0.0218	0.0166
0.66	0.58	1:1	100	0.0177	0.0146
0.67	0.58	1:1	20	0.0373	0.0295
0.67	0.58	1:1	30	0.0318	0.0235
0.67	0.58	1:1	40	0.0275	0.0202
0.67	0.58	1:1	50	0.0224	0.0177
0.67	0.58	1:1	60	0.0209	0.0159
0.67	0.58	1:1	80	0.0219	0.0163
0.67	0.58	1:1	100	0.0191	0.0152
0.68	0.58	1:1	20	0.042	0.0257
0.68	0.58	1:1	30	0.0356	0.0252
0.68	0.58	1:1	40	0.0248	0.0187
0.68	0.58	1:1	50	0.0239	0.0182
0.68	0.58	1:1	60	0.0231	0.017
0.68	0.58	1:1	80	0.0193	0.0158
0.68	0.58	1:1	100	0.0175	0.0145
0.69	0.58	1:1	20	0.046	0.0359
0.69	0.58	1:1	30	0.0334	0.0256
0.69	0.58	1:1	40	0.0291	0.0194
0.69	0.58	1:1	50	0.0223	0.0168
0.69	0.58	1:1	60	0.0233	0.0173
0.69	0.58	1:1	80	0.0206	0.0169
0.69	0.58	1:1	100	0.021	0.0172
0.7	0.58	1:1	20	0.0474	0.0292
0.7	0.58	1:1	30	0.0328	0.023
0.7	0.58	1:1	40	0.0271	0.0197
0.7	0.58	1:1	50	0.0232	0.0187
0.7	0.58	1:1	60	0.0221	0.0167
0.7	0.58	1:1	80	0.0219	0.0179
0.7	0.58	1:1	100	0.0193	0.0153
0.71	0.58	1:1	20	0.0443	0.0354
0.71	0.58	1:1	30	0.0325	0.0259
0.71	0.58	1:1	40	0.0299	0.0227
0.71	0.58	1:1	50	0.026	0.0181
0.71	0.58	1:1	60	0.023	0.0183
0.71	0.58	1:1	80	0.0204	0.016
0.71	0.58	1:1	100	0.0188	0.0149
0.72	0.58	1:1	20	0.0442	0.0336
0.72	0.58	1:1	30	0.0388	0.0306
0.72	0.58	1:1	40	0.0274	0.0214
0.72	0.58	1:1	50	0.0254	0.0189
0.72	0.58	1:1	60	0.0241	0.0175
0.72	0.58	1:1	80	0.0235	0.0189
0.72	0.58	1:1	100	0.0204	0.0163
0.73	0.58	1:1	20	0.046	0.0347
0.73	0.58	1:1	30	0.0361	0.0269
0.73	0.58	1:1	40	0.0343	0.0234
0.73	0.58	1:1	50	0.0263	0.0194
0.73	0.58	1:1	60	0.0241	0.0188
0.73	0.58	1:1	80	0.0203	0.0157
0.73	0.58	1:1	100	0.0203	0.0167
0.74	0.58	1:1	20	0.0478	0.0366
0.74	0.58	1:1	30	0.0381	0.0298
0.74	0.58	1:1	40	0.0328	0.0229
0.74	0.58	1:1	50	0.0281	0.0209
0.74	0.58	1:1	60	0.0252	0.0184
0.74	0.58	1:1	80	0.0183	0.0155
0.74	0.58	1:1	100	0.0175	0.014
0.75	0.58	1:1	20	0.057	0.0448
0.75	0.58	1:1	30	0.0363	0.0239
0.75	0.58	1:1	40	0.0323	0.0244
0.75	0.58	1:1	50	0.0266	0.0176
0.75	0.58	1:1	60	0.024	0.016
0.75	0.58	1:1	80	0.0235	0.0177
0.75	0.58	1:1	100	0.0205	0.0161
0.76	0.58	1:1	20	0.0492	0.0381
0.76	0.58	1:1	30	0.0382	0.0267
0.76	0.58	1:1	40	0.0296	0.0236
0.76	0.58	1:1	50	0.0271	0.0212
0.76	0.58	1:1	60	0.0245	0.0189
0.76	0.58	1:1	80	0.0209	0.0173
0.76	0.58	1:1	100	0.0205	0.0172
0.77	0.58	1:1	20	0.061	0.0472
0.77	0.58	1:1	30	0.0437	0.0333
0.77	0.58	1:1	40	0.0355	0.0237
0.77	0.58	1:1	50	0.0301	0.0227
0.77	0.58	1:1	60	0.0259	0.0172
0.77	0.58	1:1	80	0.0215	0.0171
0.77	0.58	1:1	100	0.021	0.0174
0.78	0.58	1:1	20	0.0542	0.0415
0.78	0.58	1:1	30	0.0435	0.0265
0.78	0.58	1:1	40	0.0344	0.0253
0.78	0.58	1:1	50	0.0285	0.0214
0.78	0.58	1:1	60	0.0271	0.0212
0.78	0.58	1:1	80	0.0197	0.0156
0.78	0.58	1:1	100	0.0189	0.0146
0.79	0.58	1:1	20	0.0615	0.0468
0.79	0.58	1:1	30	0.0378	0.0273
0.79	0.58	1:1	40	0.0374	0.0278
0.79	0.58	1:1	50	0.0286	0.0185
0.79	0.58	1:1	60	0.0278	0.0208
0.79	0.58	1:1	80	0.0222	0.0184
0.79	0.58	1:1	100	0.0201	0.0163
0.8	0.58	1:1	20	0.0558	0.0437
0.8	0.58	1:1	30	0.0381	0.0268
0.8	0.58	1:1	40	0.0363	0.0253
0.8	0.58	1:1	50	0.0265	0.0189
0.8	0.58	1:1	60	0.0271	0.0205
0.8	0.58	1:1	80	0.0227	0.0166
0.8	0.58	1:1	100	0.0208	0.0155
0.81	0.58	1:1	20	0.062	0.0464
0.81	0.58	1:1	30	0.0493	0.0351
0.81	0.58	1:1	40	0.0342	0.023
0.81	0.58	1:1	50	0.0314	0.0222
0.81	0.58	1:1	60	0.0267	0.0198
0.81	0.58	1:1	80	0.0243	0.0175
0.81	0.58	1:1	100	0.0225	0.0166
0.82	0.58	1:1	20	0.0586	0.0425
0.82	0.58	1:1	30	0.0514	0.0376
0.82	0.58	1:1	40	0.0351	0.0236
0.82	0.58	1:1	50	0.0286	0.0207
0.82	0.58	1:1	60	0.0322	0.0225
0.82	0.58	1:1	80	0.0248	0.0169
0.82	0.58	1:1	100	0.0221	0.0169
0.83	0.58	1:1	20	0.0692	0.0498
0.83	0.58	1:1	30	0.0443	0.0369
0.83	0.58	1:1	40	0.0377	0.026
0.83	0.58	1:1	50	0.0331	0.0252
0.83	0.58	1:1	60	0.0314	0.0232
0.83	0.58	1:1	80	0.0234	0.0183
0.83	0.58	1:1	100	0.019	0.0142
0.84	0.58	1:1	20	0.0827	0.0595
0.84	0.58	1:1	30	0.0473	0.0319
0.84	0.58	1:1	40	0.0414	0.0276
0.84	0.58	1:1	50	0.0347	0.0241
0.84	0.58	1:1	60	0.0295	0.0214
0.84	0.58	1:1	80	0.0251	0.0179
0.84	0.58	1:1	100	0.0216	0.0147
0.85	0.58	1:1	20	0.071	0.0496
0.85	0.58	1:1	30	0.0509	0.0326
0.85	0.58	1:1	40	0.043	0.0283
0.85	0.58	1:1	50	0.035	0.0222
0.85	0.58	1:1	60	0.0308	0.0227
0.85	0.58	1:1	80	0.0246	0.0173
0.85	0.58	1:1	100	0.0239	0.0172
0.86	0.58	1:1	20	0.0898	0.0612
0.86	0.58	1:1	30	0.059	0.0391
0.86	0.58	1:1	40	0.0364	0.0292
0.86	0.58	1:1	50	0.0366	0.0244
0.86	0.58	1:1	60	0.0317	0.0229
0.86	0.58	1:1	80	0.0265	0.0185
0.86	0.58	1:1	100	0.0252	0.0192
0.87	0.58	1:1	20	0.0746	0.0746
0.87	0.58	1:1	30	0.0566	0.0342
0.87	0.58	1:1	40	0.0421	0.031
0.87	0.58	1:1	50	0.0336	0.0244
0.87	0.58	1:1	60	0.0331	0.0235
0.87	0.58	1:1	80	0.024	0.0169
0.87	0.58	1:1	100	0.0223	0.015
0.88	0.58	1:1	20	0.085	0.0531
0.88	0.58	1:1	30	0.0588	0.0334
0.88	0.58	1:1	40	0.0445	0.0325
0.88	0.58	1:1	50	0.0356	0.0246
0.88	0.58	1:1	60	0.0334	0.0209
0.88	0.58	1:1	80	0.0277	0.0206
0.88	0.58	1:1	100	0.023	0.016
0.89	0.58	1:1	20	0.1066	0.0673
0.89	0.58	1:1	30	0.0594	0.0344
0.89	0.58	1:1	40	0.0448	0.0324
0.89	0.58	1:1	50	0.0383	0.0223
0.89	0.58	1:1	60	0.0312	0.0214
0.89	0.58	1:1	80	0.0234	0.0165
0.89	0.58	1:1	100	0.0253	0.0179
0.9	0.58	1:1	20	0.089	0.089
0.9	0.58	1:1	30	0.0661	0.051
0.9	0.58	1:1	40	0.0455	0.0309
0.9	0.58	1:1	50	0.0344	0.0229
0.9	0.58	1:1	60	0.0344	0.0222
0.9	0.58	1:1	80	0.0253	0.0167
0.9	0.58	1:1	100	0.0221	0.0152
0.6	0.59	1:1	20	0.0291	0.0188
0.6	0.59	1:1	30	0.0257	0.0179
0.6	0.59	1:1	40	0.0237	0.0171
0.6	0.59	1:1	50	0.0233	0.0189
0.6	0.59	1:1	60	0.0229	0.0183
0.6	0.59	1:1	80	0.0211	0.0175
0.6	0.59	1:1	100	0.0175	0.0142
0.61	0.59	1:1	20	0.0314	0.0243
0.61	0.59	1:1	30	0.0277	0.0195
0.61	0.59	1:1	40	0.0249	0.0181
0.61	0.59	1:1	50	0.0219	0.0167
0.61	0.59	1:1	60	0.0208	0.0157
0.61	0.59	1:1	80	0.0186	0.0153
0.61	0.59	1:1	100	0.0184	0.0151
0.62	0.59	1:1	20	0.0414	0.0278
0.62	0.59	1:1	30	0.0303	0.021
0.62	0.59	1:1	40	0.0254	0.0195
0.62	0.59	1:1	50	0.0212	0.0163
0.62	0.59	1:1	60	0.0192	0.0145
0.62	0.59	1:1	80	0.0172	0.0137
0.62	0.59	1:1	100	0.0174	0.0142
0.63	0.59	1:1	20	0.0363	0.0229
0.63	0.59	1:1	30	0.0317	0.0223
0.63	0.59	1:1	40	0.0242	0.0186
0.63	0.59	1:1	50	0.0233	0.0169
0.63	0.59	1:1	60	0.0221	0.0181
0.63	0.59	1:1	80	0.021	0.0172
0.63	0.59	1:1	100	0.0191	0.0147
0.64	0.59	1:1	20	0.0393	0.0299
0.64	0.59	1:1	30	0.0292	0.0226
0.64	0.59	1:1	40	0.0272	0.0196
0.64	0.59	1:1	50	0.023	0.016
0.64	0.59	1:1	60	0.0196	0.0148
0.64	0.59	1:1	80	0.0207	0.017
0.64	0.59	1:1	100	0.0164	0.0141
0.65	0.59	1:1	20	0.045	0.0277
0.65	0.59	1:1	30	0.0335	0.022
0.65	0.59	1:1	40	0.0251	0.0183
0.65	0.59	1:1	50	0.0245	0.0177
0.65	0.59	1:1	60	0.0219	0.0166
0.65	0.59	1:1	80	0.0238	0.0188
0.65	0.59	1:1	100	0.0184	0.015
0.66	0.59	1:1	20	0.0398	0.032
0.66	0.59	1:1	30	0.0315	0.0246
0.66	0.59	1:1	40	0.0281	0.02
0.66	0.59	1:1	50	0.0225	0.0183
[truncated: 3,643 more rows]

## Sheet: Interval length
case-control ratio	n	auc2	_NAME_	length1	length2	length3	length
1:9	40	0.7	AC	0.264634	0.264076	0.261808	0.263506
1:9	40	0.8	AC	0.239891	0.235029	0.23258	0.235833
1:9	40	0.9	AC	0.197209	0.19151	0.185331	0.19135
1:9	100	0.7	AC	0.1754	0.173886	0.172283	0.173856
1:9	100	0.8	AC	0.155923	0.153759	0.150497	0.153393
1:9	100	0.9	AC	0.123714	0.118862	0.114616	0.119064
1:9	200	0.7	AC	0.126238	0.125	0.12366	0.124966
1:9	200	0.8	AC	0.111558	0.109583	0.107599	0.10958
1:9	200	0.9	AC	0.0868305	0.0840842	0.0799476	0.0836208
1:2	40	0.7	AC	0.272255	0.269957	0.267672	0.269961
1:2	40	0.8	AC	0.246167	0.242878	0.239437	0.242828
1:2	40	0.9	AC	0.203552	0.198025	0.191647	0.197742
1:2	100	0.7	AC	0.177451	0.17588	0.174302	0.175878
1:2	100	0.8	AC	0.158099	0.155524	0.152692	0.155439
1:2	100	0.9	AC	0.125548	0.121187	0.116831	0.121189
1:2	200	0.7	AC	0.126851	0.125689	0.124542	0.125694
1:2	200	0.8	AC	0.112312	0.110428	0.108328	0.110356
1:2	200	0.9	AC	0.0877839	0.0845888	0.0810204	0.0844644
1:1	40	0.7	AC	0.273073	0.27098	0.269118	0.271057
1:1	40	0.8	AC	0.246969	0.243659	0.239852	0.243493
1:1	40	0.9	AC	0.204602	0.198918	0.192865	0.198795
1:1	100	0.7	AC	0.177669	0.176186	0.17458	0.176145
1:1	100	0.8	AC	0.158401	0.155851	0.152976	0.155743
1:1	100	0.9	AC	0.125845	0.121602	0.116861	0.121436
1:1	200	0.7	AC	0.126805	0.125775	0.124581	0.12572
1:1	200	0.8	AC	0.112237	0.110465	0.108409	0.11037
1:1	200	0.9	AC	0.0878651	0.0845741	0.0811731	0.0845374
1:9	40	0.7	Bamber	0.498033	0.493404	0.485527	0.492321
1:9	40	0.8	Bamber	0.400991	0.385168	0.376103	0.387421
1:9	40	0.9	Bamber	0.254222	0.233319	0.212247	0.233263
1:9	100	0.7	Bamber	0.336944	0.332253	0.329388	0.332862
1:9	100	0.8	Bamber	0.281518	0.275653	0.267661	0.274944
1:9	100	0.9	Bamber	0.188689	0.1756	0.162449	0.175579
1:9	200	0.7	Bamber	0.24095	0.238408	0.234664	0.238007
1:9	200	0.8	Bamber	0.203766	0.198572	0.194063	0.1988
1:9	200	0.9	Bamber	0.142903	0.135692	0.126068	0.134887
1:2	40	0.7	Bamber	0.354916	0.35014	0.34508	0.350045
1:2	40	0.8	Bamber	0.29809	0.289976	0.282557	0.290208
1:2	40	0.9	Bamber	0.199665	0.18697	0.172139	0.186258
1:2	100	0.7	Bamber	0.224492	0.221519	0.218612	0.221541
1:2	100	0.8	Bamber	0.190288	0.185686	0.180782	0.185585
1:2	100	0.9	Bamber	0.134118	0.126444	0.119087	0.12655
1:2	200	0.7	Bamber	0.15846	0.156521	0.154574	0.156518
1:2	200	0.8	Bamber	0.134477	0.131361	0.127952	0.131263
1:2	200	0.9	Bamber	0.0951606	0.0902494	0.084727	0.0900457
1:1	40	0.7	Bamber	0.326727	0.322874	0.319073	0.322891
1:1	40	0.8	Bamber	0.275984	0.269252	0.261779	0.269005
1:1	40	0.9	Bamber	0.189776	0.1778	0.165107	0.177561
1:1	100	0.7	Bamber	0.205737	0.203368	0.200637	0.203247
1:1	100	0.8	Bamber	0.174755	0.170625	0.166073	0.170484
1:1	100	0.9	Bamber	0.123318	0.116597	0.109345	0.11642
1:1	200	0.7	Bamber	0.145088	0.143509	0.141683	0.143427
1:1	200	0.8	Bamber	0.123053	0.120405	0.117339	0.120266
1:1	200	0.9	Bamber	0.0873636	0.0826591	0.0778161	0.0826129
1:9	40	0.7	binormal	0.452383	0.437047	0.43638	0.441937
1:9	40	0.8	binormal	0.378501	0.369669	0.368887	0.372352
1:9	40	0.9	binormal	0.272751	0.254897	0.243843	0.257164
1:9	100	0.7	binormal	0.318443	0.310494	0.30642	0.311786
1:9	100	0.8	binormal	0.267843	0.262324	0.254224	0.261464
1:9	100	0.9	binormal	0.190044	0.178933	0.164515	0.177831
1:9	200	0.7	binormal	0.22988	0.229442	0.226044	0.228455
1:9	200	0.8	binormal	0.196451	0.191233	0.187231	0.191638
1:9	200	0.9	binormal	0.139213	0.130033	0.123649	0.130965
1:2	40	0.7	binormal	0.344153	0.337892	0.335468	0.339171
1:2	40	0.8	binormal	0.292369	0.284334	0.27578	0.284161
1:2	40	0.9	binormal	0.204959	0.190245	0.184153	0.193119
1:2	100	0.7	binormal	0.219098	0.216857	0.213726	0.21656
1:2	100	0.8	binormal	0.185322	0.180991	0.177152	0.181155
1:2	100	0.9	binormal	0.132274	0.124342	0.115244	0.123953
1:2	200	0.7	binormal	0.154974	0.153468	0.151533	0.153325
1:2	200	0.8	binormal	0.13204	0.12969	0.125939	0.129223
1:2	200	0.9	binormal	0.0937064	0.0888614	0.0836578	0.0887418
1:1	40	0.7	binormal	0.319735	0.317279	0.312416	0.316477
1:1	40	0.8	binormal	0.27106	0.266066	0.259782	0.265636
1:1	40	0.9	binormal	0.195063	0.180517	0.166444	0.180675
1:1	100	0.7	binormal	0.202198	0.199668	0.196734	0.199533
1:1	100	0.8	binormal	0.172879	0.168046	0.164788	0.168571
1:1	100	0.9	binormal	0.120937	0.115109	0.107632	0.11456
1:1	200	0.7	binormal	0.142926	0.141471	0.139563	0.14132
1:1	200	0.8	binormal	0.121718	0.119387	0.116252	0.119119
1:1	200	0.9	binormal	0.0859059	0.0809255	0.0761667	0.0809994
1:9	40	0.7	CP	0.286293	0.285506	0.282621	0.284807
1:9	40	0.8	CP	0.25621	0.250462	0.247498	0.25139
1:9	40	0.9	CP	0.208471	0.202573	0.196236	0.202427
1:9	100	0.7	CP	0.185177	0.183529	0.181797	0.183501
1:9	100	0.8	CP	0.163865	0.161461	0.157867	0.161064
1:9	100	0.9	CP	0.127832	0.122322	0.117425	0.122526
1:9	200	0.7	CP	0.131243	0.129948	0.12855	0.129914
1:9	200	0.8	CP	0.115887	0.113818	0.111739	0.113815
1:9	200	0.9	CP	0.0897278	0.0867872	0.0823273	0.0862808
1:2	40	0.7	CP	0.295777	0.292945	0.29014	0.292954
1:2	40	0.8	CP	0.263427	0.259267	0.254923	0.259206
1:2	40	0.9	CP	0.210075	0.203516	0.195606	0.203066
1:2	100	0.7	CP	0.187429	0.185732	0.184027	0.18573
1:2	100	0.8	CP	0.166347	0.163512	0.160406	0.163422
1:2	100	0.9	CP	0.130121	0.125162	0.120173	0.125152
1:2	200	0.7	CP	0.131894	0.130681	0.129486	0.130687
1:2	200	0.8	CP	0.116706	0.114743	0.112535	0.114661
1:2	200	0.9	CP	0.0908263	0.0874106	0.0835837	0.0872735
1:1	40	0.7	CP	0.296539	0.293962	0.291673	0.294058
1:1	40	0.8	CP	0.264125	0.259921	0.255143	0.25973
1:1	40	0.9	CP	0.209881	0.20309	0.195855	0.202942
1:1	100	0.7	CP	0.187678	0.18607	0.184322	0.186024
1:1	100	0.8	CP	0.166677	0.163898	0.160734	0.163769
1:1	100	0.9	CP	0.130505	0.125663	0.120233	0.125467
1:1	200	0.7	CP	0.131846	0.130773	0.129532	0.130717
1:1	200	0.8	CP	0.116637	0.114779	0.112622	0.11468
1:1	200	0.9	CP	0.090918	0.0874061	0.0837622	0.0873621
1:9	40	0.7	LT	0.482549	0.480406	0.475344	0.479433
1:9	40	0.8	LT	0.42381	0.41174	0.406857	0.414136
1:9	40	0.9	LT	0.327036	0.314626	0.301471	0.314378
1:9	100	0.7	LT	0.329256	0.326355	0.321214	0.325608
1:9	100	0.8	LT	0.2839	0.27853	0.269811	0.277414
1:9	100	0.9	LT	0.207249	0.194607	0.185842	0.195899
1:9	200	0.7	LT	0.237825	0.23439	0.231552	0.234589
1:9	200	0.8	LT	0.20347	0.199107	0.19408	0.198886
1:9	200	0.9	LT	0.146393	0.140654	0.130876	0.139308
1:2	40	0.7	LT	0.349254	0.345169	0.34121	0.345211
1:2	40	0.8	LT	0.304166	0.299047	0.292892	0.298701
1:2	40	0.9	LT	0.229928	0.220574	0.208981	0.219828
1:2	100	0.7	LT	0.222286	0.219952	0.217551	0.21993
1:2	100	0.8	LT	0.191302	0.187085	0.18267	0.187019
1:2	100	0.9	LT	0.139366	0.132521	0.125493	0.13246
1:2	200	0.7	LT	0.157783	0.155965	0.15417	0.155972
1:2	200	0.8	LT	0.13477	0.131856	0.128665	0.131764
1:2	200	0.9	LT	0.0970328	0.0922101	0.0868837	0.0920422
1:1	40	0.7	LT	0.322752	0.319649	0.316555	0.319652
1:1	40	0.8	LT	0.281618	0.276093	0.270083	0.275931
1:1	40	0.9	LT	0.212779	0.20322	0.193421	0.20314
1:1	100	0.7	LT	0.204688	0.202497	0.199971	0.202385
1:1	100	0.8	LT	0.176006	0.172168	0.167945	0.17204
1:1	100	0.9	LT	0.128095	0.121784	0.115011	0.12163
1:1	200	0.7	LT	0.144719	0.143199	0.141443	0.14312
1:1	200	0.8	LT	0.123502	0.120948	0.117991	0.120814
1:1	200	0.9	LT	0.0890223	0.0844651	0.0797687	0.0844187
1:9	40	0.7	MW	0.503577	0.500253	0.491079	0.498303
1:9	40	0.8	MW	0.403134	0.384779	0.375914	0.387942
1:9	40	0.9	MW	0.249417	0.231738	0.211815	0.23099
1:9	100	0.7	MW	0.339246	0.335667	0.329523	0.334812
1:9	100	0.8	MW	0.283755	0.277302	0.267	0.276019
1:9	100	0.9	MW	0.190533	0.175942	0.164601	0.177025
1:9	200	0.7	MW	0.241464	0.237684	0.234537	0.237895
1:9	200	0.8	MW	0.203497	0.198685	0.19321	0.198464
1:9	200	0.9	MW	0.141145	0.134829	0.124321	0.133432
1:2	40	0.7	MW	0.360163	0.354992	0.350012	0.355056
1:2	40	0.8	MW	0.302418	0.295484	0.287642	0.295181
1:2	40	0.9	MW	0.20427	0.191459	0.176381	0.190703
1:2	100	0.7	MW	0.225127	0.222562	0.219921	0.222536
1:2	100	0.8	MW	0.191214	0.186624	0.181813	0.18655
1:2	100	0.9	MW	0.134782	0.127364	0.119808	0.127318
1:2	200	0.7	MW	0.158801	0.156896	0.155018	0.156905
1:2	200	0.8	MW	0.134745	0.131702	0.128367	0.131605
1:2	200	0.9	MW	0.0954411	0.0904344	0.0849073	0.090261
1:1	40	0.7	MW	0.331257	0.3274	0.323621	0.327426
1:1	40	0.8	MW	0.280557	0.273832	0.26634	0.273576
1:1	40	0.9	MW	0.19368	0.181561	0.168643	0.181295
1:1	100	0.7	MW	0.206888	0.204521	0.201796	0.204401
1:1	100	0.8	MW	0.175934	0.171808	0.167258	0.171666
1:1	100	0.9	MW	0.124507	0.117786	0.110524	0.117606
1:1	200	0.7	MW	0.145496	0.143918	0.142093	0.143836
1:1	200	0.8	MW	0.123471	0.120824	0.117759	0.120685
1:1	200	0.9	MW	0.0877837	0.0830779	0.0782332	0.0830316
1:9	40	0.7	Wald	0.314944	0.314093	0.310319	0.313119
1:9	40	0.8	Wald	0.272252	0.263181	0.258844	0.264759
1:9	40	0.9	Wald	0.190914	0.179455	0.1671	0.179157
1:9	100	0.7	Wald	0.206152	0.204182	0.202099	0.204144
1:9	100	0.8	Wald	0.180643	0.177783	0.17346	0.177295
1:9	100	0.9	Wald	0.136533	0.129423	0.12311	0.129688
1:9	200	0.7	Wald	0.147157	0.145642	0.144	0.1456
1:9	200	0.8	Wald	0.129136	0.126701	0.124251	0.126696
1:9	200	0.9	Wald	0.0983509	0.0948816	0.08961	0.0942809
1:2	40	0.7	Wald	0.328608	0.325074	0.321465	0.325049
1:2	40	0.8	Wald	0.286508	0.28079	0.274879	0.280726
1:2	40	0.9	Wald	0.206416	0.194981	0.181531	0.194309
1:2	100	0.7	Wald	0.20885	0.206817	0.204773	0.206813
1:2	100	0.8	Wald	0.183652	0.180271	0.176542	0.180155
1:2	100	0.9	Wald	0.140091	0.133987	0.127779	0.133952
1:2	200	0.7	Wald	0.147913	0.146491	0.145089	0.146497
1:2	200	0.8	Wald	0.130087	0.127767	0.125178	0.127677
1:2	200	0.9	Wald	0.0996279	0.095603	0.0910893	0.0954401
1:1	40	0.7	Wald	0.329978	0.326756	0.323869	0.326867
1:1	40	0.8	Wald	0.288326	0.282731	0.276275	0.282444
1:1	40	0.9	Wald	0.208997	0.197316	0.184371	0.196894
1:1	100	0.7	Wald	0.209137	0.207218	0.205139	0.207165
1:1	100	0.8	Wald	0.184062	0.180716	0.176932	0.18057
1:1	100	0.9	Wald	0.140558	0.134667	0.127961	0.134395
1:1	200	0.7	Wald	0.147856	0.146597	0.145138	0.146531
1:1	200	0.8	Wald	0.129997	0.127816	0.12528	0.127698
1:1	200	0.9	Wald	0.0997367	0.095594	0.0912926	0.0955411
1:9	40	0.7	Wald_cc	0.33876	0.337904	0.333939	0.336868
1:9	40	0.8	Wald_cc	0.293929	0.284235	0.279704	0.285956
1:9	40	0.9	Wald_cc	0.207835	0.195821	0.18286	0.195505
1:9	100	0.7	Wald_cc	0.216152	0.214181	0.212098	0.214144
1:9	100	0.8	Wald_cc	0.190617	0.187752	0.183413	0.18726
1:9	100	0.9	Wald_cc	0.145834	0.138477	0.131888	0.138733
1:9	200	0.7	Wald_cc	0.152157	0.150642	0.149	0.1506
1:9	200	0.8	Wald_cc	0.134136	0.131701	0.129251	0.131696
1:9	200	0.9	Wald_cc	0.103344	0.0998715	0.0945833	0.0992663
1:2	40	0.7	Wald_cc	0.353413	0.349833	0.346128	0.349791
1:2	40	0.8	Wald_cc	0.309694	0.303601	0.297302	0.303532
1:2	40	0.9	Wald_cc	0.223191	0.210939	0.196665	0.210265
1:2	100	0.7	Wald_cc	0.21885	0.216817	0.214773	0.216813
1:2	100	0.8	Wald_cc	0.193652	0.19027	0.186541	0.190154
1:2	100	0.9	Wald_cc	0.149907	0.14365	0.137204	0.143587
1:2	200	0.7	Wald_cc	0.152913	0.151491	0.150089	0.151497
1:2	200	0.8	Wald_cc	0.135087	0.132767	0.130178	0.132677
1:2	200	0.9	Wald_cc	0.104628	0.100603	0.0960892	0.10044
1:1	40	0.7	Wald_cc	0.354851	0.351603	0.348692	0.351715
1:1	40	0.8	Wald_cc	0.311816	0.305841	0.298936	0.305531
1:1	40	0.9	Wald_cc	0.225704	0.213099	0.199293	0.212699
1:1	100	0.7	Wald_cc	0.219137	0.217218	0.215139	0.217165
1:1	100	0.8	Wald_cc	0.194062	0.190715	0.186932	0.19057
1:1	100	0.9	Wald_cc	0.150424	0.144399	0.137475	0.144099
1:1	200	0.7	Wald_cc	0.152856	0.151597	0.150138	0.151531
1:1	200	0.8	Wald_cc	0.134997	0.132816	0.13028	0.132698
1:1	200	0.9	Wald_cc	0.104737	0.100594	0.0962925	0.100541
1:9	40	0.7	Wilson	0.261384	0.260753	0.25819	0.260109
1:9	40	0.8	Wilson	0.233341	0.227788	0.225016	0.228715
1:9	40	0.9	Wilson	0.184982	0.178594	0.171682	0.178419
1:9	100	0.7	Wilson	0.17477	0.17318	0.171497	0.173149
1:9	100	0.8	Wilson	0.154258	0.151969	0.148516	0.151581
1:9	100	0.9	Wilson	0.119875	0.11463	0.110022	0.114842
1:9	200	0.7	Wilson	0.126044	0.124776	0.123403	0.124741
1:9	200	0.8	Wilson	0.110989	0.108958	0.106918	0.108955
1:9	200	0.9	Wilson	0.0854506	0.0825933	0.0782761	0.0821067
1:2	40	0.7	Wilson	0.270105	0.267529	0.264956	0.26753
1:2	40	0.8	Wilson	0.240626	0.236869	0.232946	0.236814
1:2	40	0.9	Wilson	0.191704	0.185349	0.178039	0.185031
1:2	100	0.7	Wilson	0.176935	0.17529	0.173637	0.175287
1:2	100	0.8	Wilson	0.156606	0.15389	0.150898	0.153798
1:2	100	0.9	Wilson	0.121986	0.117283	0.112567	0.117279
1:2	200	0.7	Wilson	0.126674	0.125484	0.12431	0.125489
1:2	200	0.8	Wilson	0.111772	0.109837	0.107679	0.109763
1:2	200	0.9	Wilson	0.0864704	0.0831508	0.0794358	0.083019
1:1	40	0.7	Wilson	0.271039	0.268694	0.266606	0.26878
1:1	40	0.8	Wilson	0.241574	0.23781	0.233465	0.237617
1:1	40	0.9	Wilson	0.192837	0.186328	0.17935	0.186172
1:1	100	0.7	Wilson	0.177166	0.175612	0.17393	0.175569
1:1	100	0.8	Wilson	0.15693	0.154241	0.151205	0.154125
1:1	100	0.9	Wilson	0.122316	0.117748	0.112618	0.117561
1:1	200	0.7	Wilson	0.126627	0.125573	0.124351	0.125517
1:1	200	0.8	Wilson	0.111697	0.109877	0.107763	0.109779
1:1	200	0.9	Wilson	0.0865575	0.0831394	0.0795989	0.0830986
1:9	40	0.7	Wilson_cc	0.284041	0.283411	0.280841	0.282764
1:9	40	0.8	Wilson_cc	0.255894	0.250309	0.247524	0.251242
1:9	40	0.9	Wilson_cc	0.207148	0.20068	0.193679	0.200502
1:9	100	0.7	Wilson_cc	0.184387	0.182797	0.181114	0.182766
1:9	100	0.8	Wilson_cc	0.163868	0.161578	0.158122	0.161189
1:9	100	0.9	Wilson_cc	0.129452	0.124197	0.119581	0.12441
1:9	200	0.7	Wilson_cc	0.130947	0.12968	0.128307	0.129645
1:9	200	0.8	Wilson_cc	0.115891	0.113861	0.111819	0.113857
1:9	200	0.9	Wilson_cc	0.0903483	0.08749	0.083171	0.0870031
1:2	40	0.7	Wilson_cc	0.292798	0.290218	0.287641	0.290219
1:2	40	0.8	Wilson_cc	0.263258	0.259489	0.255556	0.259434
1:2	40	0.9	Wilson_cc	0.214108	0.207701	0.200328	0.207379
1:2	100	0.7	Wilson_cc	0.186553	0.184908	0.183254	0.184905
1:2	100	0.8	Wilson_cc	0.166219	0.163501	0.160508	0.163409
1:2	100	0.9	Wilson_cc	0.131576	0.126866	0.122144	0.126862
1:2	200	0.7	Wilson_cc	0.131578	0.130388	0.129213	0.130393
1:2	200	0.8	Wilson_cc	0.116675	0.114739	0.112581	0.114665
1:2	200	0.9	Wilson_cc	0.091369	0.0880485	0.0843323	0.0879166
1:1	40	0.7	Wilson_cc	0.293734	0.291386	0.289294	0.291471
1:1	40	0.8	Wilson_cc	0.264212	0.260437	0.256082	0.260244
1:1	40	0.9	Wilson_cc	0.215269	0.20871	0.201671	0.20855
1:1	100	0.7	Wilson_cc	0.186784	0.18523	0.183547	0.185187
1:1	100	0.8	Wilson_cc	0.166542	0.163852	0.160815	0.163737
1:1	100	0.9	Wilson_cc	0.131907	0.127333	0.122196	0.127145
1:1	200	0.7	Wilson_cc	0.13153	0.130476	0.129254	0.13042
1:1	200	0.8	Wilson_cc	0.116599	0.114779	0.112665	0.114681
1:1	200	0.9	Wilson_cc	0.0914562	0.0880372	0.0844955	0.0879963

## Sheet: Coverage
case-control ratio	n	auc2	_NAME_	alpha1	alpha2	alpha3	alpha	coverage
1:1	40	0.7	AC	0.0862	0.0821	0.0721	0.0801333	0.919867
1:1	40	0.8	AC	0.0645	0.0626	0.0599	0.0623333	0.937667
1:1	40	0.9	AC	0.0433	0.0362	0.0372	0.0389	0.9611
1:1	100	0.7	AC	0.0772	0.0806	0.0808	0.0795333	0.920467
1:1	100	0.8	AC	0.0697	0.0724	0.0674	0.0698333	0.930167
1:1	100	0.9	AC	0.0473	0.0435	0.0396	0.0434667	0.956533
1:1	200	0.7	AC	0.0808	0.0849	0.0818	0.0825	0.9175
1:1	200	0.8	AC	0.0703	0.0713	0.0708	0.0708	0.9292
1:1	200	0.9	AC	0.0507	0.0472	0.0416	0.0465	0.9535
1:1	40	0.7	Bamber	0.0753	0.0715	0.0644	0.0704	0.9296
1:1	40	0.8	Bamber	0.0773	0.0816	0.0858	0.0815667	0.918433
1:1	40	0.9	Bamber	0.1117	0.1183	0.1233	0.117767	0.882233
1:1	100	0.7	Bamber	0.0538	0.058	0.0581	0.0566333	0.943367
1:1	100	0.8	Bamber	0.0616	0.0627	0.0685	0.0642667	0.935733
1:1	100	0.9	Bamber	0.0782	0.0802	0.0835	0.0806333	0.919367
1:1	200	0.7	Bamber	0.0536	0.0543	0.0539	0.0539333	0.946067
1:1	200	0.8	Bamber	0.0611	0.0575	0.0627	0.0604333	0.939567
1:1	200	0.9	Bamber	0.061	0.0634	0.0631	0.0625	0.9375
1:1	40	0.7	binormal	0.073	0.067	0.072	0.0706667	0.929333
1:1	40	0.8	binormal	0.096	0.09	0.087	0.091	0.909
1:1	40	0.9	binormal	0.081	0.107	0.12	0.102667	0.897333
1:1	100	0.7	binormal	0.069	0.06	0.069	0.066	0.934
1:1	100	0.8	binormal	0.066	0.06	0.056	0.0606667	0.939333
1:1	100	0.9	binormal	0.067	0.075	0.086	0.076	0.924
1:1	200	0.7	binormal	0.043	0.05	0.043	0.0453333	0.954667
1:1	200	0.8	binormal	0.058	0.052	0.056	0.0553333	0.944667
1:1	200	0.9	binormal	0.066	0.063	0.071	0.0666667	0.933333
1:1	40	0.7	CP	0.075	0.0712	0.0605	0.0689	0.9311
1:1	40	0.8	CP	0.050005	0.043313	0.036711	0.043343	0.956657
1:1	40	0.9	CP	0.0142943	0.01933	0.0294597	0.021028	0.978972
1:1	100	0.7	CP	0.0662	0.066	0.0646	0.0656	0.9344
1:1	100	0.8	CP	0.0563	0.0546	0.0604	0.0571	0.9429
1:1	100	0.9	CP	0.0403	0.0444	0.0313	0.0386667	0.961333
1:1	200	0.7	CP	0.0679	0.0788	0.0728	0.0731667	0.926833
1:1	200	0.8	CP	0.0576	0.0616	0.0577	0.0589667	0.941033
1:1	200	0.9	CP	0.0461	0.0333	0.0321	0.0371667	0.962833
1:1	40	0.7	LT	0.0421	0.0407	0.0355	0.0394333	0.960567
1:1	40	0.8	LT	0.0374	0.0404	0.039	0.0389333	0.961067
1:1	40	0.9	LT	0.043922	0.048048	0.0487365	0.0469022	0.953098
1:1	100	0.7	LT	0.0445	0.046	0.0447	0.0450667	0.954933
1:1	100	0.8	LT	0.0465	0.0502	0.0471	0.0479333	0.952067
1:1	100	0.9	LT	0.0471	0.0496	0.0507	0.0491333	0.950867
1:1	200	0.7	LT	0.0469	0.0479	0.0478	0.0475333	0.952467
1:1	200	0.8	LT	0.0482	0.0482	0.0503	0.0489	0.9511
1:1	200	0.9	LT	0.0504	0.0488	0.0485	0.0492333	0.950767
1:1	40	0.7	MW	0.0717	0.0674	0.061	0.0667	0.9333
1:1	40	0.8	MW	0.0733	0.0771	0.0812	0.0772	0.9228
1:1	40	0.9	MW	0.1041	0.112	0.1154	0.1105	0.8895
1:1	100	0.7	MW	0.0525	0.0567	0.0566	0.0552667	0.944733
1:1	100	0.8	MW	0.0593	0.0606	0.0667	0.0622	0.9378
1:1	100	0.9	MW	0.0756	0.0768	0.0814	0.0779333	0.922067
1:1	200	0.7	MW	0.053	0.0533	0.0531	0.0531333	0.946867
1:1	200	0.8	MW	0.0602	0.0571	0.0615	0.0596	0.9404
1:1	200	0.9	MW	0.0598	0.0622	0.062	0.0613333	0.938667
1:1	40	0.7	Wald	0.0659	0.0623	0.0562	0.0614667	0.938533
1:1	40	0.8	Wald	0.0623	0.0623	0.058	0.0608667	0.939133
1:1	40	0.9	Wald	0.0616	0.0673	0.0714	0.0667667	0.933233
1:1	100	0.7	Wald	0.0476	0.0509	0.0513	0.0499333	0.950067
1:1	100	0.8	Wald	0.0467	0.0477	0.0488	0.0477333	0.952267
1:1	100	0.9	Wald	0.0417	0.0398	0.0411	0.0408667	0.959133
1:1	200	0.7	Wald	0.0476	0.0476	0.0467	0.0473	0.9527
1:1	200	0.8	Wald	0.0454	0.042	0.0453	0.0442333	0.955767
1:1	200	0.9	Wald	0.0355	0.0326	0.0293	0.0324667	0.967533
1:1	40	0.7	Wald_cc	0.0513	0.0484	0.0427	0.0474667	0.952533
1:1	40	0.8	Wald_cc	0.0402	0.0441	0.0387	0.041	0.959
1:1	40	0.9	Wald_cc	0.0425	0.047	0.0495	0.0463333	0.953667
1:1	100	0.7	Wald_cc	0.0405	0.0431	0.0409	0.0415	0.9585
1:1	100	0.8	Wald_cc	0.0366	0.0363	0.0391	0.0373333	0.962667
1:1	100	0.9	Wald_cc	0.0296	0.0287	0.0278	0.0287	0.9713
1:1	200	0.7	Wald_cc	0.0413	0.0403	0.0394	0.0403333	0.959667
1:1	200	0.8	Wald_cc	0.0385	0.0344	0.0372	0.0367	0.9633
1:1	200	0.9	Wald_cc	0.0266	0.0242	0.0226	0.0244667	0.975533
1:1	40	0.7	Wilson	0.0892	0.087	0.0767	0.0843	0.9157
1:1	40	0.8	Wilson	0.0697	0.0693	0.0664	0.0684667	0.931533
1:1	40	0.9	Wilson	0.0533	0.0422	0.0438	0.0464333	0.953567
1:1	100	0.7	Wilson	0.0794	0.0827	0.0817	0.0812667	0.918733
1:1	100	0.8	Wilson	0.0719	0.0766	0.0704	0.0729667	0.927033
1:1	100	0.9	Wilson	0.0515	0.0494	0.0439	0.0482667	0.951733
1:1	200	0.7	Wilson	0.082	0.0856	0.0826	0.0834	0.9166
1:1	200	0.8	Wilson	0.0716	0.0724	0.0727	0.0722333	0.927767
1:1	200	0.9	Wilson	0.0538	0.0509	0.0462	0.0503	0.9497
1:1	40	0.7	Wilson_cc	0.0624	0.0614	0.0543	0.0593667	0.940633
1:1	40	0.8	Wilson_cc	0.0456	0.0454	0.0442	0.0450667	0.954933
1:1	40	0.9	Wilson_cc	0.0305	0.0252	0.0263	0.0273333	0.972667
1:1	100	0.7	Wilson_cc	0.064	0.066	0.0677	0.0659	0.9341
1:1	100	0.8	Wilson_cc	0.0563	0.0585	0.0534	0.0560667	0.943933
1:1	100	0.9	Wilson_cc	0.0358	0.034	0.0301	0.0333	0.9667
1:1	200	0.7	Wilson_cc	0.0722	0.0737	0.0708	0.0722333	0.927767
1:1	200	0.8	Wilson_cc	0.0607	0.0599	0.0609	0.0605	0.9395
1:1	200	0.9	Wilson_cc	0.0411	0.0376	0.0339	0.0375333	0.962467

## Sheet: Power I
AUC1	Estimator_AUC	LT	Wald_cc	delta
0.8	0.800135	0.040404	0.0443	0
0.801	0.800558	0.039	0.0455	0.001
0.802	0.802596	0.0409041	0.0467	0.002
0.803	0.804253	0.0426	0.0481	0.003
0.804	0.803494	0.0391	0.0465	0.004
0.805	0.804826	0.0424	0.0532	0.005
0.806	0.80578	0.0419	0.0506	0.006
0.807	0.806028	0.0411	0.0515	0.007
0.808	0.807677	0.0419	0.0542	0.008
0.809	0.807574	0.0414	0.0527	0.009
0.81	0.811555	0.0412041	0.0557	0.01
0.811	0.811428	0.043	0.0607	0.011
0.812	0.811786	0.0394	0.0541	0.012
0.813	0.812741	0.0423	0.0594	0.013
0.814	0.814972	0.0413	0.0599	0.014
0.815	0.814558	0.0387	0.0571	0.015
0.816	0.815534	0.0416	0.0619	0.016
0.817	0.816698	0.0441044	0.0647	0.017
0.818	0.817404	0.0381	0.0626	0.018
0.819	0.819385	0.0441	0.0702	0.019
0.82	0.820146	0.0448	0.067	0.02
0.821	0.820876	0.0397	0.0659	0.021
0.822	0.821809	0.0412041	0.0695	0.022
0.823	0.822624	0.0448	0.0724	0.023
0.824	0.824654	0.0435	0.0747	0.024
0.825	0.823975	0.0457	0.0761	0.025
0.826	0.824855	0.0480096	0.0773	0.026
0.827	0.827386	0.049505	0.0827	0.027
0.828	0.828834	0.0506051	0.0849	0.028
0.829	0.829135	0.0503	0.0863	0.029
0.83	0.829886	0.0486	0.0869	0.03
0.831	0.83202	0.0579058	0.0953	0.031
0.832	0.832225	0.0528	0.0916	0.032
0.833	0.833521	0.0535054	0.0971	0.033
0.834	0.834953	0.0572057	0.1	0.034
0.835	0.83496	0.059606	0.1042	0.035
0.836	0.834184	0.053	0.0964	0.036
0.837	0.837345	0.0605061	0.1015	0.037
0.838	0.838053	0.0612	0.1023	0.038
0.839	0.83961	0.0658	0.1148	0.039
0.84	0.838914	0.0619124	0.1104	0.04
0.841	0.841098	0.0672	0.1227	0.041
0.842	0.841108	0.0669067	0.1166	0.042
0.843	0.843315	0.0672067	0.1229	0.043
0.844	0.844163	0.0693139	0.1254	0.044
0.845	0.844853	0.0680204	0.1245	0.045
0.846	0.845025	0.0715143	0.1248	0.046
0.847	0.847001	0.0783078	0.136	0.047
0.848	0.848125	0.0787079	0.1362	0.048
0.849	0.848952	0.0757076	0.1414	0.049
0.85	0.850765	0.0833083	0.1496	0.05
0.851	0.851422	0.0846169	0.1464	0.051
0.852	0.852239	0.0864086	0.1512	0.052
0.853	0.85368	0.0914	0.1582	0.053
0.854	0.854012	0.0915	0.1597	0.054
0.855	0.854496	0.0863086	0.158	0.055
0.856	0.85633	0.0974097	0.1702	0.056
0.857	0.857297	0.0985099	0.1727	0.057
0.858	0.857697	0.0960096	0.1697	0.058
0.859	0.859448	0.107421	0.1832	0.059
0.86	0.860871	0.109233	0.1879	0.06
0.861	0.861217	0.113723	0.1887	0.061
0.862	0.862105	0.110011	0.1917	0.062
0.863	0.861547	0.115535	0.1915	0.063
0.864	0.863954	0.116423	0.2008	0.064
0.865	0.865055	0.118836	0.2063	0.065
0.866	0.864811	0.119136	0.201	0.066
0.867	0.867393	0.127626	0.2165	0.067
0.868	0.868008	0.1308	0.2197	0.068
0.869	0.869329	0.130578	0.2248	0.069
0.87	0.869606	0.135809	0.2282	0.07
0.871	0.870701	0.138141	0.2316	0.071
0.872	0.872034	0.142814	0.2408	0.072
0.873	0.872329	0.145558	0.2416	0.073
0.874	0.873508	0.146929	0.2456	0.074
0.875	0.875218	0.160464	0.2616	0.075
0.876	0.876397	0.158127	0.265	0.076
0.877	0.878113	0.163948	0.2726	0.077
0.878	0.87808	0.172569	0.2766	0.078
0.879	0.878052	0.169068	0.2715	0.079
0.88	0.880692	0.179125	0.2875	0.08
0.881	0.881399	0.178007	0.2898	0.081
0.882	0.882333	0.186975	0.3007	0.082
0.883	0.883478	0.192739	0.3114	0.083
0.884	0.882579	0.189657	0.3032	0.084
0.885	0.88496	0.193878	0.3145	0.085
0.886	0.885127	0.20106	0.3213	0.086
0.887	0.886835	0.209789	0.333	0.087
0.888	0.888609	0.221822	0.3399	0.088
0.889	0.888681	0.220699	0.3494	0.089
0.89	0.890945	0.227396	0.3559	0.09
0.891	0.89116	0.23043	0.3556	0.091
0.892	0.892151	0.237013	0.3694	0.092
0.893	0.893575	0.245921	0.3822	0.093
0.894	0.894104	0.243917	0.3785	0.094
0.895	0.894525	0.247547	0.3867	0.095
0.896	0.896893	0.259912	0.4001	0.096
0.897	0.897244	0.264038	0.4036	0.097
0.898	0.898073	0.275931	0.4166	0.098
0.899	0.898636	0.278579	0.4221	0.099
0.9	0.90038	0.284598	0.4304	0.1
0.901	0.901734	0.291554	0.4378	0.101
0.902	0.902021	0.297324	0.4463	0.102
0.903	0.903287	0.307338	0.4582	0.103
0.904	0.904587	0.311574	0.4663	0.104
0.905	0.905714	0.322545	0.4781	0.105
0.906	0.905407	0.324086	0.4699	0.106
0.907	0.906984	0.332231	0.488	0.107
0.908	0.90677	0.3332	0.4842	0.108
0.909	0.908438	0.341945	0.4968	0.109
0.91	0.910407	0.357908	0.5102	0.11
0.911	0.910725	0.361623	0.5194	0.111
0.912	0.912336	0.378159	0.5386	0.112
0.913	0.913109	0.379659	0.5422	0.113
0.914	0.913234	0.38561	0.5415	0.114
0.915	0.914783	0.397074	0.5529	0.115
0.916	0.916227	0.407987	0.573	0.116
0.917	0.917228	0.417937	0.5831	0.117
0.918	0.919024	0.429216	0.5927	0.118
0.919	0.918833	0.42731	0.5976	0.119
0.92	0.920016	0.426404	0.6006	0.12
0.921	0.919962	0.434224	0.6021	0.121
0.922	0.922369	0.458956	0.6233	0.122
0.923	0.923172	0.46245	0.6336	0.123
0.924	0.923863	0.469466	0.6396	0.124
0.925	0.925027	0.483472	0.6484	0.125
0.926	0.925787	0.490744	0.6574	0.126
0.927	0.926881	0.490644	0.6665	0.127
0.928	0.927786	0.510257	0.6733	0.128
0.929	0.928387	0.510553	0.6786	0.129
0.93	0.930481	0.533829	0.698	0.13
0.931	0.931234	0.541465	0.7099	0.131
0.932	0.931682	0.544227	0.7131	0.132
0.933	0.932891	0.555365	0.7255	0.133
0.934	0.933626	0.558924	0.7298	0.134
0.935	0.93505	0.576768	0.7435	0.135
0.936	0.935249	0.584366	0.7449	0.136
0.937	0.937242	0.599556	0.7577	0.137
0.938	0.938518	0.609687	0.7743	0.138
0.939	0.939163	0.622701	0.7827	0.139
0.94	0.939832	0.629211	0.7835	0.14
0.941	0.942047	0.647702	0.8058	0.141
0.942	0.941537	0.633539	0.7983	0.142
0.943	0.943069	0.658164	0.8111	0.143
0.944	0.944543	0.671339	0.823	0.144
0.945	0.945035	0.680722	0.8268	0.145
0.946	0.946225	0.688774	0.8384	0.146
0.947	0.946765	0.699634	0.8414	0.147
0.948	0.947669	0.703493	0.8506	0.148
0.949	0.949161	0.716017	0.8598	0.149
0.95	0.949856	0.728781	0.8646	0.15
0.951	0.950602	0.733639	0.8691	0.151
0.952	0.951628	0.743739	0.8798	0.152
0.953	0.953013	0.761307	0.8857	0.153
0.954	0.953823	0.760954	0.8898	0.154
0.955	0.955478	0.779223	0.9027	0.155
0.956	0.956333	0.782993	0.9128	0.156
0.957	0.956939	0.792639	0.9138	0.157
0.958	0.958421	0.804021	0.9224	0.158
0.959	0.95891	0.811797	0.9221	0.159
0.96	0.959953	0.823021	0.9346	0.16
0.961	0.961181	0.83048	0.9347	0.161
0.962	0.962025	0.837843	0.941	0.162
0.963	0.96309	0.851128	0.9482	0.163
0.964	0.96396	0.855009	0.9484	0.164
0.965	0.964967	0.860375	0.9544	0.165
0.966	0.965974	0.877952	0.961	0.166
0.967	0.966891	0.883567	0.964	0.167
0.968	0.967672	0.882247	0.9645	0.168
0.969	0.969217	0.898938	0.9712	0.169
0.97	0.969924	0.897463	0.9744	0.17
0.971	0.971206	0.907859	0.9761	0.171
0.972	0.971754	0.91483	0.9794	0.172
0.973	0.973057	0.921978	0.9817	0.173
0.974	0.974189	0.92709	0.9844	0.174
0.975	0.974867	0.933282	0.9854	0.175
0.976	0.975799	0.935598	0.9884	0.176
0.977	0.976788	0.946108	0.9895	0.177
0.978	0.977893	0.95032	0.9923	0.178
0.979	0.978971	0.956497	0.9931	0.179
0.98	0.980052	0.957162	0.9943	0.18
0.981	0.981082	0.964499	0.9954	0.181
0.982	0.981814	0.967272	0.9954	0.182
0.983	0.983067	0.971391	0.9969	0.183
0.984	0.983865	0.974609	0.9978	0.184
0.985	0.985057	0.981299	0.9983	0.185
0.986	0.986107	0.979668	0.9984	0.186
0.987	0.987046	0.985347	0.9996	0.187
0.988	0.987955	0.984757	0.9995	0.188
0.989	0.988936	0.987298	0.9994	0.189
0.99	0.989946	0.987691	0.9998	0.19

## Sheet: Power II
AUC1	Estimator_AUC	LT	Wald	NewVar
0.7	0.700152	0.0448	0.0462	0.0014
0.701	0.700341	0.0471	0.0475	0.0004
0.702	0.702613	0.0499	0.0516	0.0017
0.703	0.702801	0.0468	0.0489	0.0021
0.704	0.704026	0.047	0.0496	0.0026
0.705	0.704763	0.0493	0.0531	0.0038
0.706	0.706759	0.0504	0.0573	0.0069
0.707	0.706861	0.0514	0.0571	0.0057
0.708	0.707657	0.0524	0.0567	0.0043
0.709	0.70874	0.0541	0.059	0.0049
0.71	0.710562	0.0533	0.0622	0.0089
0.711	0.71104	0.0556	0.0614	0.0058
0.712	0.712049	0.0632	0.0689	0.0057
0.713	0.712565	0.0638	0.0714	0.0076
0.714	0.713654	0.0634	0.0717	0.0083
0.715	0.715227	0.0635	0.0735	0.01
0.716	0.716158	0.0664	0.0772	0.0108
0.717	0.716674	0.0736	0.0849	0.0113
0.718	0.718582	0.0728	0.0886	0.0158
0.719	0.719083	0.0774	0.089	0.0116
0.72	0.720518	0.0788	0.093	0.0142
0.721	0.720586	0.0801	0.0944	0.0143
0.722	0.721789	0.0835	0.097	0.0135
0.723	0.723516	0.0957	0.1085	0.0128
0.724	0.723785	0.0918	0.1085	0.0167
0.725	0.724698	0.0983	0.1129	0.0146
0.726	0.726031	0.1046	0.1201	0.0155
0.727	0.72728	0.1074	0.1249	0.0175
0.728	0.728454	0.1126	0.133	0.0204
0.729	0.728847	0.117	0.1353	0.0183
0.73	0.729725	0.1243	0.1433	0.019
0.731	0.731174	0.1283	0.15	0.0217
0.732	0.732163	0.1329	0.1533	0.0204
0.733	0.732947	0.1386	0.16	0.0214
0.734	0.733695	0.1461	0.1681	0.022
0.735	0.734765	0.1548	0.178	0.0232
0.736	0.736231	0.1576	0.1807	0.0231
0.737	0.736965	0.1689	0.1934	0.0245
0.738	0.738054	0.1713	0.1995	0.0282
0.739	0.73878	0.1777	0.2022	0.0245
0.74	0.739852	0.188	0.2167	0.0287
0.741	0.741631	0.2045	0.2293	0.0248
0.742	0.742277	0.2067	0.2358	0.0291
0.743	0.74291	0.2102	0.2409	0.0307
0.744	0.74367	0.2148	0.2438	0.029
0.745	0.745372	0.2309	0.2591	0.0282
0.746	0.745577	0.2287	0.2599	0.0312
0.747	0.747078	0.245	0.2774	0.0324
0.748	0.747518	0.2483	0.278	0.0297
0.749	0.748942	0.2675	0.2988	0.0313
0.75	0.750386	0.2747	0.3085	0.0338
0.751	0.751076	0.2889	0.3208	0.0319
0.752	0.75133	0.286	0.3206	0.0346
0.753	0.753344	0.3084	0.3429	0.0345
0.754	0.75475	0.3254	0.3635	0.0381
0.755	0.755038	0.3278	0.3655	0.0377
0.756	0.755894	0.3349	0.372	0.0371
0.757	0.757302	0.3481	0.3854	0.0373
0.758	0.757681	0.3532	0.3879	0.0347
0.759	0.759094	0.3745	0.4109	0.0364
0.76	0.759868	0.3756	0.4107	0.0351
0.761	0.761539	0.3968	0.4332	0.0364
0.762	0.761931	0.4038	0.4412	0.0374
0.763	0.763271	0.4145	0.4529	0.0384
0.764	0.763573	0.4177	0.4544	0.0367
0.765	0.765239	0.437	0.4783	0.0413
0.766	0.766111	0.4544	0.4927	0.0383
0.767	0.766773	0.4533	0.4941	0.0408
0.768	0.767835	0.4712	0.5094	0.0382
0.769	0.768761	0.4833	0.5228	0.0395
0.77	0.769823	0.4983	0.5338	0.0355
0.771	0.771206	0.5091	0.5472	0.0381
0.772	0.771825	0.5209	0.5635	0.0426
0.773	0.772998	0.5314	0.574	0.0426
0.774	0.774788	0.5594	0.5985	0.0391
0.775	0.775463	0.5617	0.5973	0.0356
0.776	0.776323	0.5731	0.6118	0.0387
0.777	0.777086	0.5798	0.621	0.0412
0.778	0.778026	0.5959	0.6338	0.0379
0.779	0.778824	0.61	0.6471	0.0371
0.78	0.78022	0.6139	0.6535	0.0396
0.781	0.781078	0.6331	0.6714	0.0383
0.782	0.781434	0.638	0.6764	0.0384
0.783	0.782999	0.65	0.6878	0.0378
0.784	0.783747	0.6667	0.6988	0.0321
0.785	0.784932	0.6827	0.7168	0.0341
0.786	0.786286	0.686	0.7199	0.0339
0.787	0.787385	0.7092	0.7425	0.0333
0.788	0.788594	0.7159	0.7491	0.0332
0.789	0.788629	0.7162	0.7449	0.0287
0.79	0.789918	0.734	0.7631	0.0291
0.791	0.790397	0.7357	0.7666	0.0309
0.792	0.792133	0.7528	0.781	0.0282
0.793	0.792866	0.7644	0.7945	0.0301
0.794	0.793905	0.7658	0.7939	0.0281
0.795	0.795168	0.7849	0.8116	0.0267
0.796	0.796283	0.7996	0.8277	0.0281
0.797	0.796673	0.799	0.8224	0.0234
0.798	0.798323	0.8163	0.8431	0.0268
0.799	0.798827	0.8174	0.8426	0.0252
0.8	0.800178	0.8318	0.8554	0.0236
0.801	0.801026	0.8365	0.8572	0.0207
0.802	0.801907	0.8455	0.8681	0.0226
0.803	0.80268	0.851	0.8733	0.0223
0.804	0.803671	0.8567	0.8775	0.0208
0.805	0.805229	0.8632	0.8842	0.021
0.806	0.805568	0.8692	0.8886	0.0194
0.807	0.807501	0.8799	0.8988	0.0189
0.808	0.808234	0.8856	0.9039	0.0183
0.809	0.809379	0.8988	0.9145	0.0157
0.81	0.810288	0.8999	0.918	0.0181
0.811	0.811165	0.9041	0.921	0.0169
0.812	0.811759	0.9095	0.9225	0.013
0.813	0.812939	0.9194	0.934	0.0146
0.814	0.813836	0.9222	0.934	0.0118
0.815	0.815331	0.9317	0.9436	0.0119
0.816	0.815684	0.9297	0.9416	0.0119
0.817	0.816789	0.9351	0.9481	0.013
0.818	0.81823	0.9429	0.9526	0.0097
0.819	0.819461	0.9465	0.9554	0.0089
0.82	0.819627	0.9451	0.9542	0.0091
0.821	0.82122	0.9531	0.9625	0.0094
0.822	0.822137	0.957	0.9645	0.0075
0.823	0.822888	0.9572	0.9665	0.0093
0.824	0.823361	0.9609	0.9684	0.0075
0.825	0.825462	0.9666	0.9722	0.0056
0.826	0.825754	0.9673	0.9726	0.0053
0.827	0.827023	0.9689	0.9754	0.0065
0.828	0.827648	0.9711	0.9764	0.0053
0.829	0.828932	0.9757	0.9822	0.0065
0.83	0.829874	0.9752	0.9804	0.0052
0.831	0.83091	0.978	0.9814	0.0034
0.832	0.832486	0.9802	0.9844	0.0042
0.833	0.832658	0.982	0.9852	0.0032
0.834	0.833852	0.9834	0.9868	0.0034
0.835	0.835015	0.9873	0.9904	0.0031
0.836	0.835601	0.9863	0.9889	0.0026
0.837	0.836926	0.9868	0.9912	0.0044
0.838	0.837456	0.9889	0.9912	0.0023
0.839	0.839178	0.9905	0.9923	0.0018
0.84	0.839963	0.9912	0.9927	0.0015
0.841	0.840928	0.9906	0.993	0.0024
0.842	0.841756	0.9934	0.9945	0.0011
0.843	0.842775	0.9926	0.9943	0.0017
0.844	0.844294	0.9953	0.9966	0.0013
0.845	0.845315	0.9952	0.9963	0.0011
0.846	0.845829	0.9967	0.9972	0.0005
0.847	0.846922	0.9953	0.9971	0.0018
0.848	0.84792	0.9961	0.9973	0.0012
0.849	0.848861	0.9959	0.9964	0.0005
0.85	0.84964	0.9963	0.9968	0.0005
0.851	0.851201	0.9965	0.9973	0.0008
0.852	0.852758	0.9979	0.9982	0.0003
0.853	0.853078	0.998	0.9982	0.0002
0.854	0.853902	0.998	0.9985	0.0005
0.855	0.85543	0.9986	0.9993	0.0007
0.856	0.856159	0.9986	0.9989	0.0003
0.857	0.857198	0.9985	0.999	0.0005
0.858	0.85794	0.9992	0.9993	0.0001
0.859	0.858934	0.9993	0.9993	0
0.86	0.859778	0.9993	0.9994	0.0001
0.861	0.861194	0.9993	0.9993	0
0.862	0.861959	0.9993	0.9998	0.0005
0.863	0.862733	0.9995	0.9996	0.0001
0.864	0.864002	0.9997	0.9998	0.0001
0.865	0.864716	0.9998	0.9999	0.0001
0.866	0.866363	0.9997	0.9997	0
0.867	0.867143	1	1	0
0.868	0.868215	0.9998	0.9998	0
0.869	0.86903	0.9994	0.9996	0.0002
0.87	0.870349	1	1	0
0.871	0.870778	0.9999	1	0.0001
0.872	0.87183	0.9999	0.9999	0
0.873	0.872708	0.9998	0.9998	0
0.874	0.874	1	1	0
0.875	0.875511	0.9999	1	0.0001
0.876	0.875928	1	1	0
0.877	0.877122	1	1	0
0.878	0.878196	1	1	0
0.879	0.879122	1	1	0
0.88	0.880209	1	1	0
0.881	0.881101	0.9999	0.9999	0
0.882	0.882208	1	1	0
0.883	0.882776	1	1	0
0.884	0.883539	1	1	0
0.885	0.884909	1	1	0
0.886	0.886197	1	1	0
0.887	0.886684	1	1	0
0.888	0.888095	0.9999	0.9999	0
0.889	0.888813	1	1	0
0.89	0.890097	1	1	0
0.891	0.891069	1	1	0
0.892	0.892027	1	1	0
0.893	0.893319	1	1	0
0.894	0.893736	1	1	0
0.895	0.895191	1	1	0
0.896	0.895756	1	1	0
0.897	0.897009	1	1	0
0.898	0.897762	1	1	0
0.899	0.899386	1	1	0
0.9	0.89975	1	1	0

## Sheet: case-control ratio
case-control ratio	n	auc2	_NAME_	alpha1	alpha2	alpha3	alpha	coverage
1:9	40	0.7	AC	0.3096	0.3038	0.2962	0.3032	0.6968
1:9	40	0.8	AC	0.2753	0.2691	0.2647	0.2697	0.7303
1:9	40	0.9	AC	0.1741	0.1328	0.1262	0.144367	0.855633
1:9	100	0.7	AC	0.2952	0.2992	0.2952	0.296533	0.703467
1:9	100	0.8	AC	0.2809	0.2735	0.2713	0.275233	0.724767
1:9	100	0.9	AC	0.2282	0.2156	0.1968	0.213533	0.786467
1:9	200	0.7	AC	0.2897	0.2975	0.3043	0.297167	0.702833
1:9	200	0.8	AC	0.2778	0.2836	0.2732	0.2782	0.7218
1:9	200	0.9	AC	0.2306	0.2317	0.2136	0.2253	0.7747
1:2	40	0.7	AC	0.1119	0.1058	0.1101	0.109267	0.890733
1:2	40	0.8	AC	0.0903	0.0986	0.0851	0.0913333	0.908667
1:2	40	0.9	AC	0.055	0.0519	0.0525	0.0531333	0.946867
1:2	100	0.7	AC	0.1107	0.1096	0.1064	0.1089	0.8911
1:2	100	0.8	AC	0.0979	0.0958	0.094	0.0959	0.9041
1:2	100	0.9	AC	0.0628	0.063	0.0563	0.0607	0.9393
1:2	200	0.7	AC	0.1139	0.112	0.1062	0.1107	0.8893
1:2	200	0.8	AC	0.0953	0.1017	0.0972	0.0980667	0.901933
1:2	200	0.9	AC	0.0634	0.0679	0.0607	0.064	0.936
1:1	40	0.7	AC	0.0862	0.0821	0.0721	0.0801333	0.919867
1:1	40	0.8	AC	0.0645	0.0626	0.0599	0.0623333	0.937667
1:1	40	0.9	AC	0.0433	0.0362	0.0372	0.0389	0.9611
1:1	100	0.7	AC	0.0772	0.0806	0.0808	0.0795333	0.920467
1:1	100	0.8	AC	0.0697	0.0724	0.0674	0.0698333	0.930167
1:1	100	0.9	AC	0.0473	0.0435	0.0396	0.0434667	0.956533
1:1	200	0.7	AC	0.0808	0.0849	0.0818	0.0825	0.9175
1:1	200	0.8	AC	0.0703	0.0713	0.0708	0.0708	0.9292
1:1	200	0.9	AC	0.0507	0.0472	0.0416	0.0465	0.9535
1:9	40	0.7	Bamber	0.136075	0.126005	0.130806	0.130962	0.869038
1:9	40	0.8	Bamber	0.145979	0.157146	0.155516	0.15288	0.84712
1:9	40	0.9	Bamber	0.209588	0.235029	0.226466	0.223694	0.776306
1:9	100	0.7	Bamber	0.0759	0.0758	0.0714	0.0743667	0.925633
1:9	100	0.8	Bamber	0.0854	0.0866	0.0883	0.0867667	0.913233
1:9	100	0.9	Bamber	0.1096	0.115	0.1213	0.1153	0.8847
1:9	200	0.7	Bamber	0.0576	0.0608	0.068	0.0621333	0.937867
1:9	200	0.8	Bamber	0.0692	0.0686	0.0676	0.0684667	0.931533
1:9	200	0.9	Bamber	0.0775	0.0761	0.0817	0.0784333	0.921567
1:2	40	0.7	Bamber	0.0763	0.0733	0.0784	0.076	0.924
1:2	40	0.8	Bamber	0.0895	0.0932	0.0908	0.0911667	0.908833
1:2	40	0.9	Bamber	0.1217	0.1294	0.1429	0.131333	0.868667
1:2	100	0.7	Bamber	0.0573	0.0582	0.0618	0.0591	0.9409
1:2	100	0.8	Bamber	0.0636	0.065	0.0668	0.0651333	0.934867
1:2	100	0.9	Bamber	0.0744	0.0813	0.082	0.0792333	0.920767
1:2	200	0.7	Bamber	0.0549	0.0525	0.053	0.0534667	0.946533
1:2	200	0.8	Bamber	0.0555	0.0591	0.0578	0.0574667	0.942533
1:2	200	0.9	Bamber	0.0621	0.065	0.0618	0.0629667	0.937033
1:1	40	0.7	Bamber	0.0753	0.0715	0.0644	0.0704	0.9296
1:1	40	0.8	Bamber	0.0773	0.0816	0.0858	0.0815667	0.918433
1:1	40	0.9	Bamber	0.1117	0.1183	0.1233	0.117767	0.882233
1:1	100	0.7	Bamber	0.0538	0.058	0.0581	0.0566333	0.943367
1:1	100	0.8	Bamber	0.0616	0.0627	0.0685	0.0642667	0.935733
1:1	100	0.9	Bamber	0.0782	0.0802	0.0835	0.0806333	0.919367
1:1	200	0.7	Bamber	0.0536	0.0543	0.0539	0.0539333	0.946067
1:1	200	0.8	Bamber	0.0611	0.0575	0.0627	0.0604333	0.939567
1:1	200	0.9	Bamber	0.061	0.0634	0.0631	0.0625	0.9375
1:9	40	0.7	binormal	0.162	0.207	0.195	0.188	0.812
1:9	40	0.8	binormal	0.2	0.206	0.196	0.200667	0.799333
1:9	40	0.9	binormal	0.212	0.241	0.255	0.236	0.764
1:9	100	0.7	binormal	0.093	0.107	0.111	0.103667	0.896333
1:9	100	0.8	binormal	0.11	0.124	0.11	0.114667	0.885333
1:9	100	0.9	binormal	0.131	0.128	0.155	0.138	0.862
1:9	200	0.7	binormal	0.096	0.073	0.07	0.0796667	0.920333
1:9	200	0.8	binormal	0.073	0.081	0.076	0.0766667	0.923333
1:9	200	0.9	binormal	0.092	0.11	0.108	0.103333	0.896667
1:2	40	0.7	binormal	0.082	0.083	0.089	0.0846667	0.915333
1:2	40	0.8	binormal	0.102	0.094	0.116	0.104	0.896
1:2	40	0.9	binormal	0.107	0.126	0.127	0.12	0.88
1:2	100	0.7	binormal	0.058	0.076	0.068	0.0673333	0.932667
1:2	100	0.8	binormal	0.075	0.067	0.078	0.0733333	0.926667
1:2	100	0.9	binormal	0.084	0.082	0.089	0.085	0.915
1:2	200	0.7	binormal	0.057	0.048	0.045	0.05	0.95
1:2	200	0.8	binormal	0.06	0.055	0.064	0.0596667	0.940333
1:2	200	0.9	binormal	0.059	0.066	0.054	0.0596667	0.940333
1:1	40	0.7	binormal	0.073	0.067	0.072	0.0706667	0.929333
1:1	40	0.8	binormal	0.096	0.09	0.087	0.091	0.909
1:1	40	0.9	binormal	0.081	0.107	0.12	0.102667	0.897333
1:1	100	0.7	binormal	0.069	0.06	0.069	0.066	0.934
1:1	100	0.8	binormal	0.066	0.06	0.056	0.0606667	0.939333
1:1	100	0.9	binormal	0.067	0.075	0.086	0.076	0.924
1:1	200	0.7	binormal	0.043	0.05	0.043	0.0453333	0.954667
1:1	200	0.8	binormal	0.058	0.052	0.056	0.0553333	0.944667
1:1	200	0.9	binormal	0.066	0.063	0.071	0.0666667	0.933333
1:9	40	0.7	CP	0.298007	0.286	0.261914	0.281974	0.718026
1:9	40	0.8	CP	0.243848	0.24021	0.230465	0.238175	0.761825
1:9	40	0.9	CP	0.0968157	0.118359	0.127202	0.114126	0.885874
1:9	100	0.7	CP	0.2758	0.273	0.2649	0.271233	0.728767
1:9	100	0.8	CP	0.257	0.2411	0.2664	0.254833	0.745167
1:9	100	0.9	CP	0.209947	0.233227	0.198959	0.214044	0.785956
1:9	200	0.7	CP	0.2688	0.2894	0.2911	0.2831	0.7169
1:9	200	0.8	CP	0.2556	0.2677	0.2508	0.258033	0.741967
1:9	200	0.9	CP	0.2275	0.207	0.191	0.2085	0.7915
1:2	40	0.7	CP	0.10211	0.0957	0.0932	0.0970034	0.902997
1:2	40	0.8	CP	0.0788158	0.0720288	0.0603241	0.0703896	0.92961
1:2	40	0.9	CP	0.024924	0.0320212	0.0408415	0.0325956	0.967404
1:2	100	0.7	CP	0.0978	0.0935	0.0888	0.0933667	0.906633
1:2	100	0.8	CP	0.0818	0.0771	0.0888	0.0825667	0.917433
1:2	100	0.9	CP	0.0532	0.0666	0.0490049	0.0562683	0.943732
1:2	200	0.7	CP	0.0947	0.1068	0.0948	0.0987667	0.901233
1:2	200	0.8	CP	0.0791	0.0907	0.0792	0.083	0.917
1:2	200	0.9	CP	0.0597	0.0513	0.0498	0.0536	0.9464
1:1	40	0.7	CP	0.075	0.0712	0.0605	0.0689	0.9311
1:1	40	0.8	CP	0.050005	0.043313	0.036711	0.043343	0.956657
1:1	40	0.9	CP	0.0142943	0.01933	0.0294597	0.021028	0.978972
1:1	100	0.7	CP	0.0662	0.066	0.0646	0.0656	0.9344
1:1	100	0.8	CP	0.0563	0.0546	0.0604	0.0571	0.9429
1:1	100	0.9	CP	0.0403	0.0444	0.0313	0.0386667	0.961333
1:1	200	0.7	CP	0.0679	0.0788	0.0728	0.0731667	0.926833
1:1	200	0.8	CP	0.0576	0.0616	0.0577	0.0589667	0.941033
1:1	200	0.9	CP	0.0461	0.0333	0.0321	0.0371667	0.962833
1:9	40	0.7	LT	0.0991992	0.0918919	0.0923462	0.0944791	0.905521
1:9	40	0.8	LT	0.0846896	0.0949361	0.0920721	0.0905659	0.909434
1:9	40	0.9	LT	0.0548589	0.0271894	0.0247493	0.0355992	0.964401
1:9	100	0.7	LT	0.0611	0.0646	0.0608	0.0621667	0.937833
1:9	100	0.8	LT	0.0719	0.0746	0.0707	0.0724	0.9276
1:9	100	0.9	LT	0.0904	0.0959384	0.0926093	0.0929825	0.907017
1:9	200	0.7	LT	0.0511	0.0564	0.0605	0.056	0.944
1:9	200	0.8	LT	0.0614	0.0638	0.0633	0.0628333	0.937167
1:9	200	0.9	LT	0.0729	0.0732	0.0771	0.0744	0.9256
1:2	40	0.7	LT	0.0435	0.0425	0.0463	0.0441	0.9559
1:2	40	0.8	LT	0.0463	0.0494	0.0451045	0.0469348	0.953065
1:2	40	0.9	LT	0.0513771	0.0521303	0.046248	0.0499185	0.950082
1:2	100	0.7	LT	0.0455	0.0448	0.048	0.0461	0.9539
1:2	100	0.8	LT	0.0498	0.0484	0.0509	0.0497	0.9503
1:2	100	0.9	LT	0.0484	0.0514	0.0523	0.0507	0.9493
1:2	200	0.7	LT	0.0482	0.0473	0.0468	0.0474333	0.952567
1:2	200	0.8	LT	0.0491	0.0536	0.0487	0.0504667	0.949533
1:2	200	0.9	LT	0.0475	0.0524	0.0486	0.0495	0.9505
1:1	40	0.7	LT	0.0421	0.0407	0.0355	0.0394333	0.960567
1:1	40	0.8	LT	0.0374	0.0404	0.039	0.0389333	0.961067
1:1	40	0.9	LT	0.043922	0.048048	0.0487365	0.0469022	0.953098
1:1	100	0.7	LT	0.0445	0.046	0.0447	0.0450667	0.954933
1:1	100	0.8	LT	0.0465	0.0502	0.0471	0.0479333	0.952067
1:1	100	0.9	LT	0.0471	0.0496	0.0507	0.0491333	0.950867
1:1	200	0.7	LT	0.0469	0.0479	0.0478	0.0475333	0.952467
1:1	200	0.8	LT	0.0482	0.0482	0.0503	0.0489	0.9511
1:1	200	0.9	LT	0.0504	0.0488	0.0485	0.0492333	0.950767
1:9	40	0.7	MW	0.1559	0.1475	0.153	0.152133	0.847867
1:9	40	0.8	MW	0.1714	0.1906	0.1898	0.183933	0.816067
1:9	40	0.9	MW	0.2475	0.248	0.2607	0.252067	0.747933
1:9	100	0.7	MW	0.085	0.0918	0.0863	0.0877	0.9123
1:9	100	0.8	MW	0.1101	0.1071	0.1097	0.108967	0.891033
1:9	100	0.9	MW	0.1491	0.1587	0.1629	0.1569	0.8431
1:9	200	0.7	MW	0.0625	0.0695	0.0769	0.0696333	0.930367
1:9	200	0.8	MW	0.0797	0.0833	0.0844	0.0824667	0.917533
1:9	200	0.9	MW	0.1058	0.1034	0.1206	0.109933	0.890067
1:2	40	0.7	MW	0.0755	0.0726	0.0762	0.0747667	0.925233
1:2	40	0.8	MW	0.0895	0.0916	0.0932	0.0914333	0.908567
1:2	40	0.9	MW	0.1212	0.13	0.1428	0.131333	0.868667
1:2	100	0.7	MW	0.0588	0.0593	0.0612	0.0597667	0.940233
1:2	100	0.8	MW	0.0622	0.0644	0.0701	0.0655667	0.934433
1:2	100	0.9	MW	0.0782	0.0827	0.0869	0.0826	0.9174
1:2	200	0.7	MW	0.054	0.0521	0.0519	0.0526667	0.947333
1:2	200	0.8	MW	0.057	0.0596	0.0589	0.0585	0.9415
1:2	200	0.9	MW	0.0621	0.0691	0.0656	0.0656	0.9344
1:1	40	0.7	MW	0.0717	0.0674	0.061	0.0667	0.9333
1:1	40	0.8	MW	0.0733	0.0771	0.0812	0.0772	0.9228
1:1	40	0.9	MW	0.1041	0.112	0.1154	0.1105	0.8895
1:1	100	0.7	MW	0.0525	0.0567	0.0566	0.0552667	0.944733
1:1	100	0.8	MW	0.0593	0.0606	0.0667	0.0622	0.9378
1:1	100	0.9	MW	0.0756	0.0768	0.0814	0.0779333	0.922067
1:1	200	0.7	MW	0.053	0.0533	0.0531	0.0531333	0.946867
1:1	200	0.8	MW	0.0602	0.0571	0.0615	0.0596	0.9404
1:1	200	0.9	MW	0.0598	0.0622	0.062	0.0613333	0.938667
1:9	40	0.7	Wald	0.2764	0.2614	0.2661	0.267967	0.732033
1:9	40	0.8	Wald	0.263	0.2823	0.2778	0.274367	0.725633
1:9	40	0.9	Wald	0.2661	0.2621	0.2969	0.275033	0.724967
1:9	100	0.7	Wald	0.2392	0.2437	0.2454	0.242767	0.757233
1:9	100	0.8	Wald	0.237	0.2323	0.2351	0.2348	0.7652
1:9	100	0.9	Wald	0.2157	0.2155	0.2158	0.215667	0.784333
1:9	200	0.7	Wald	0.232	0.239	0.247	0.239333	0.760667
1:9	200	0.8	Wald	0.2247	0.2269	0.2199	0.223833	0.776167
1:9	200	0.9	Wald	0.1994	0.1949	0.1924	0.195567	0.804433
1:2	40	0.7	Wald	0.0869	0.087	0.0872	0.0870333	0.912967
1:2	40	0.8	Wald	0.0867	0.0913	0.09	0.0893333	0.910667
1:2	40	0.9	Wald	0.0951	0.0933	0.0929	0.0937667	0.906233
1:2	100	0.7	Wald	0.0741	0.0726	0.0731	0.0732667	0.926733
1:2	100	0.8	Wald	0.0665	0.0662	0.0684	0.0670333	0.932967
1:2	100	0.9	Wald	0.0545	0.059	0.0558	0.0564333	0.943567
1:2	200	0.7	Wald	0.0707	0.0702	0.0672	0.0693667	0.930633
1:2	200	0.8	Wald	0.0615	0.0642	0.0622	0.0626333	0.937367
1:2	200	0.9	Wald	0.047	0.0506	0.0436	0.0470667	0.952933
1:1	40	0.7	Wald	0.0659	0.0623	0.0562	0.0614667	0.938533
1:1	40	0.8	Wald	0.0623	0.0623	0.058	0.0608667	0.939133
1:1	40	0.9	Wald	0.0616	0.0673	0.0714	0.0667667	0.933233
1:1	100	0.7	Wald	0.0476	0.0509	0.0513	0.0499333	0.950067
1:1	100	0.8	Wald	0.0467	0.0477	0.0488	0.0477333	0.952267
1:1	100	0.9	Wald	0.0417	0.0398	0.0411	0.0408667	0.959133
1:1	200	0.7	Wald	0.0476	0.0476	0.0467	0.0473	0.9527
1:1	200	0.8	Wald	0.0454	0.042	0.0453	0.0442333	0.955767
1:1	200	0.9	Wald	0.0355	0.0326	0.0293	0.0324667	0.967533
1:9	40	0.7	Wald_cc	0.2466	0.2351	0.2387	0.240133	0.759867
1:9	40	0.8	Wald_cc	0.2286	0.2483	0.2412	0.239367	0.760633
1:9	40	0.9	Wald_cc	0.2198	0.2073	0.2352	0.220767	0.779233
1:9	100	0.7	Wald_cc	0.2218	0.2226	0.2221	0.222167	0.777833
1:9	100	0.8	Wald_cc	0.2102	0.2078	0.207	0.208333	0.791667
1:9	100	0.9	Wald_cc	0.1884	0.1866	0.1844	0.186467	0.813533
1:9	200	0.7	Wald_cc	0.2163	0.2228	0.2322	0.223767	0.776233
1:9	200	0.8	Wald_cc	0.2071	0.2106	0.2021	0.2066	0.7934
1:9	200	0.9	Wald_cc	0.1776	0.173	0.169	0.1732	0.8268
1:2	40	0.7	Wald_cc	0.0694	0.0664	0.0677	0.0678333	0.932167
1:2	40	0.8	Wald_cc	0.0647	0.0663	0.0647	0.0652333	0.934767
1:2	40	0.9	Wald_cc	0.0597	0.0653	0.0598	0.0616	0.9384
1:2	100	0.7	Wald_cc	0.0604	0.0609	0.0629	0.0614	0.9386
1:2	100	0.8	Wald_cc	0.0551	0.0534	0.0561	0.0548667	0.945133
1:2	100	0.9	Wald_cc	0.0414	0.0428	0.0394	0.0412	0.9588
1:2	200	0.7	Wald_cc	0.0612	0.0614	0.0584	0.0603333	0.939667
1:2	200	0.8	Wald_cc	0.0525	0.0546	0.051	0.0527	0.9473
1:2	200	0.9	Wald_cc	0.0362	0.0371	0.0334	0.0355667	0.964433
1:1	40	0.7	Wald_cc	0.0513	0.0484	0.0427	0.0474667	0.952533
1:1	40	0.8	Wald_cc	0.0402	0.0441	0.0387	0.041	0.959
1:1	40	0.9	Wald_cc	0.0425	0.047	0.0495	0.0463333	0.953667
1:1	100	0.7	Wald_cc	0.0405	0.0431	0.0409	0.0415	0.9585
1:1	100	0.8	Wald_cc	0.0366	0.0363	0.0391	0.0373333	0.962667
1:1	100	0.9	Wald_cc	0.0296	0.0287	0.0278	0.0287	0.9713
1:1	200	0.7	Wald_cc	0.0413	0.0403	0.0394	0.0403333	0.959667
1:1	200	0.8	Wald_cc	0.0385	0.0344	0.0372	0.0367	0.9633
1:1	200	0.9	Wald_cc	0.0266	0.0242	0.0226	0.0244667	0.975533
1:9	40	0.7	Wilson	0.3248	0.3038	0.2992	0.309267	0.690733
1:9	40	0.8	Wilson	0.2922	0.29	0.2823	0.288167	0.711833
1:9	40	0.9	Wilson	0.2097	0.2298	0.2021	0.213867	0.786133
1:9	100	0.7	Wilson	0.2988	0.3024	0.2954	0.298867	0.701133
1:9	100	0.8	Wilson	0.2891	0.2821	0.2756	0.282267	0.717733
1:9	100	0.9	Wilson	0.2394	0.2369	0.2209	0.2324	0.7676
1:9	200	0.7	Wilson	0.2913	0.2983	0.3049	0.298167	0.701833
1:9	200	0.8	Wilson	0.2802	0.2856	0.2773	0.281033	0.718967
1:9	200	0.9	Wilson	0.2373	0.2396	0.2256	0.234167	0.765833
1:2	40	0.7	Wilson	0.119	0.1147	0.1181	0.117267	0.882733
1:2	40	0.8	Wilson	0.102	0.1064	0.0924	0.100267	0.899733
1:2	40	0.9	Wilson	0.0695	0.0655	0.0557	0.0635667	0.936433
1:2	100	0.7	Wilson	0.1124	0.1117	0.1085	0.110867	0.889133
1:2	100	0.8	Wilson	0.1008	0.0996	0.0982	0.0995333	0.900467
1:2	100	0.9	Wilson	0.0718	0.0701	0.0639	0.0686	0.9314
1:2	200	0.7	Wilson	0.1148	0.1132	0.1071	0.1117	0.8883
1:2	200	0.8	Wilson	0.0963	0.1042	0.0994	0.0999667	0.900033
1:2	200	0.9	Wilson	0.067	0.0714	0.0664	0.0682667	0.931733
1:1	40	0.7	Wilson	0.0892	0.087	0.0767	0.0843	0.9157
1:1	40	0.8	Wilson	0.0697	0.0693	0.0664	0.0684667	0.931533
1:1	40	0.9	Wilson	0.0533	0.0422	0.0438	0.0464333	0.953567
1:1	100	0.7	Wilson	0.0794	0.0827	0.0817	0.0812667	0.918733
1:1	100	0.8	Wilson	0.0719	0.0766	0.0704	0.0729667	0.927033
1:1	100	0.9	Wilson	0.0515	0.0494	0.0439	0.0482667	0.951733
1:1	200	0.7	Wilson	0.082	0.0856	0.0826	0.0834	0.9166
1:1	200	0.8	Wilson	0.0716	0.0724	0.0727	0.0722333	0.927767
1:1	200	0.9	Wilson	0.0538	0.0509	0.0462	0.0503	0.9497
1:9	40	0.7	Wilson_cc	0.2782	0.2572	0.2628	0.266067	0.733933
1:9	40	0.8	Wilson_cc	0.2365	0.2491	0.2431	0.2429	0.7571
1:9	40	0.9	Wilson_cc	0.1624	0.1225	0.1141	0.133	0.867
1:9	100	0.7	Wilson_cc	0.2709	0.273	0.2714	0.271767	0.728233
1:9	100	0.8	Wilson_cc	0.257	0.2476	0.2475	0.2507	0.7493
1:9	100	0.9	Wilson_cc	0.201	0.1897	0.178	0.189567	0.810433
1:9	200	0.7	Wilson_cc	0.2745	0.2812	0.287	0.2809	0.7191
1:9	200	0.8	Wilson_cc	0.2592	0.2632	0.2564	0.2596	0.7404
1:9	200	0.9	Wilson_cc	0.2097	0.2112	0.195	0.2053	0.7947
1:2	40	0.7	Wilson_cc	0.0892	0.0829	0.0879	0.0866667	0.913333
1:2	40	0.8	Wilson_cc	0.067	0.0724	0.0658	0.0684	0.9316
1:2	40	0.9	Wilson_cc	0.0438	0.0367	0.0351	0.0385333	0.961467
1:2	100	0.7	Wilson_cc	0.0959	0.0935	0.0921	0.0938333	0.906167
1:2	100	0.8	Wilson_cc	0.0818	0.0801	0.0803	0.0807333	0.919267
1:2	100	0.9	Wilson_cc	0.0487	0.0501	0.0453	0.0480333	0.951967
1:2	200	0.7	Wilson_cc	0.0994	0.0992	0.0928	0.0971333	0.902867
1:2	200	0.8	Wilson_cc	0.0831	0.0884	0.0834	0.0849667	0.915033
1:2	200	0.9	Wilson_cc	0.0542	0.0557	0.0511	0.0536667	0.946333
1:1	40	0.7	Wilson_cc	0.0624	0.0614	0.0543	0.0593667	0.940633
1:1	40	0.8	Wilson_cc	0.0456	0.0454	0.0442	0.0450667	0.954933
1:1	40	0.9	Wilson_cc	0.0305	0.0252	0.0263	0.0273333	0.972667
1:1	100	0.7	Wilson_cc	0.064	0.066	0.0677	0.0659	0.9341
1:1	100	0.8	Wilson_cc	0.0563	0.0585	0.0534	0.0560667	0.943933
1:1	100	0.9	Wilson_cc	0.0358	0.034	0.0301	0.0333	0.9667
1:1	200	0.7	Wilson_cc	0.0722	0.0737	0.0708	0.0722333	0.927767
1:1	200	0.8	Wilson_cc	0.0607	0.0599	0.0609	0.0605	0.9395
1:1	200	0.9	Wilson_cc	0.0411	0.0376	0.0339	0.0375333	0.962467

## Sheet: ordinal data
AUC	n	Estimator_AUC	cov_LT	cov_Wald	cov_Waldcc	auc2	ord_cont
0.69	40	0.680424	0.9659	0.9414	0.9533	0.7	2
0.7	40	0.690828	0.9636	0.9438	0.9614	0.7	2
0.71	40	0.699636	0.9722	0.9546	0.9641	0.7	2
0.79	40	0.778218	0.9752	0.939	0.9723	0.8	2
0.8	40	0.787546	0.9685	0.9532	0.9617	0.8	2
0.81	40	0.798306	0.9651	0.9528	0.9754	0.8	2
0.89	40	0.87678	0.9652	0.9801	0.9846	0.9	2
0.9	40	0.886862	0.9608	0.9691	0.974	0.9	2
0.91	40	0.896922	0.9583	0.9611	0.9636	0.9	2
0.69	100	0.680762	0.9561	0.9564	0.963	0.7	2
0.7	100	0.690422	0.9594	0.9588	0.9644	0.7	2
0.71	100	0.700214	0.9536	0.9493	0.9662	0.7	2
0.79	100	0.777269	0.9534	0.9471	0.9641	0.8	2
0.8	100	0.787074	0.9512	0.9526	0.9702	0.8	2
0.81	100	0.797656	0.954	0.9579	0.9679	0.8	2
0.89	100	0.876788	0.9582	0.9742	0.9794	0.9	2
0.9	100	0.886761	0.9501	0.9814	0.9814	0.9	2
0.91	100	0.896994	0.9472	0.9823	0.9868	0.9	2
0.69	200	0.68159	0.9551	0.9555	0.9595	0.7	2
0.7	200	0.690263	0.9488	0.9489	0.9605	0.7	2
0.71	200	0.699957	0.9449	0.9493	0.9562	0.7	2
0.79	200	0.778669	0.9448	0.9575	0.9679	0.8	2
0.8	200	0.787786	0.9433	0.9535	0.9617	0.8	2
0.81	200	0.797682	0.9476	0.9617	0.9617	0.8	2
0.89	200	0.876978	0.9373	0.9651	0.9773	0.9	2
0.9	200	0.88685	0.9397	0.9658	0.9786	0.9	2
0.91	200	0.896482	0.932	0.9689	0.9818	0.9	2
0.69	40	0.68947	0.9579	0.9341	0.9487	0.7	1
0.7	40	0.700238	0.9593	0.9377	0.9516	0.7	1
0.71	40	0.70943	0.9645	0.9438	0.9573	0.7	1
0.79	40	0.790036	0.9626	0.9377	0.9598	0.8	1
0.8	40	0.799666	0.9596	0.9377	0.9559	0.8	1
0.81	40	0.810347	0.961	0.942	0.9613	0.8	1
0.89	40	0.889721	0.956078	0.9384	0.9575	0.9	1
0.9	40	0.899885	0.951952	0.9327	0.953	0.9	1
0.91	40	0.909949	0.951264	0.9286	0.9505	0.9	1
0.69	100	0.690107	0.9555	0.9524	0.9595	0.7	1
0.7	100	0.699918	0.954	0.9491	0.9569	0.7	1
0.71	100	0.71012	0.9553	0.9487	0.9591	0.7	1
0.79	100	0.789461	0.9535	0.9533	0.9634	0.8	1
0.8	100	0.799415	0.9498	0.9523	0.9637	0.8	1
0.81	100	0.810104	0.9529	0.9512	0.9609	0.8	1
0.89	100	0.890003	0.9529	0.9583	0.9704	0.9	1
0.9	100	0.899869	0.9504	0.9602	0.9713	0.9	1
0.91	100	0.910194	0.9493	0.9589	0.9722	0.9	1
0.69	200	0.690809	0.9531	0.9524	0.9587	0.7	1
0.7	200	0.699986	0.9521	0.9524	0.9597	0.7	1
0.71	200	0.710112	0.9522	0.9533	0.9606	0.7	1
0.79	200	0.790863	0.9518	0.9546	0.9615	0.8	1
0.8	200	0.800138	0.9518	0.958	0.9656	0.8	1
0.81	200	0.810308	0.9497	0.9547	0.9628	0.8	1
0.89	200	0.890176	0.9496	0.9645	0.9734	0.9	1
0.9	200	0.900157	0.9512	0.9674	0.9758	0.9	1
0.91	200	0.90983	0.9515	0.9707	0.9774	0.9	1

## Sheet: var. heterogeneity coverage
AUC	sigma	n	Estimator_AUC	cov_LT	cov_Wald	cov_Waldcc	auc2
0.69	0.5	40	0.666517	0.9492	0.9375	0.9526	0.7
0.7	0.5	40	0.676237	0.9506	0.9414	0.9555	0.7
0.71	0.5	40	0.683584	0.9438	0.9396	0.9542	0.7
0.79	0.5	40	0.757444	0.9304	0.9411	0.9593	0.8
0.8	0.5	40	0.765599	0.9272	0.9446	0.9614	0.8
0.81	0.5	40	0.7758	0.9239	0.944	0.9602	0.8
0.89	0.5	40	0.856	0.894779	0.9554	0.9707	0.9
0.9	0.5	40	0.866004	0.892579	0.9603	0.9755	0.9
0.91	0.5	40	0.877874	0.887155	0.9575	0.9746	0.9
0.69	0.5	100	0.66634	0.9347	0.9412	0.9519	0.7
0.7	0.5	100	0.674576	0.9222	0.9323	0.945	0.7
0.71	0.5	100	0.683752	0.9207	0.9327	0.9455	0.7
0.79	0.5	100	0.75816	0.8924	0.9305	0.9441	0.8
0.8	0.5	100	0.767654	0.8857	0.9274	0.9432	0.8
0.81	0.5	100	0.775946	0.8765	0.9238	0.9383	0.8
0.89	0.5	100	0.856262	0.8197	0.9293	0.9443	0.9
0.9	0.5	100	0.866582	0.8072	0.9306	0.9478	0.9
0.91	0.5	100	0.877079	0.8	0.9323	0.9508	0.9
0.69	0.5	200	0.665833	0.9031	0.9168	0.9253	0.7
0.7	0.5	200	0.674883	0.895	0.9115	0.9214	0.7
0.71	0.5	200	0.684061	0.8881	0.9063	0.9179	0.7
0.79	0.5	200	0.757051	0.8212	0.8728	0.8886	0.8
0.8	0.5	200	0.76737	0.8174	0.8759	0.889	0.8
0.81	0.5	200	0.776429	0.8027	0.8714	0.8868	0.8
0.89	0.5	200	0.856386	0.6936	0.8439	0.8663	0.9
0.9	0.5	200	0.86656	0.6776	0.844	0.871	0.9
0.91	0.5	200	0.877201	0.658	0.8372	0.8669	0.9
0.69	1	40	0.689454	0.9569	0.9364	0.9519	0.7
0.7	1	40	0.700179	0.9598	0.9408	0.9544	0.7
0.71	1	40	0.710352	0.9597	0.9412	0.9546	0.7
0.79	1	40	0.789718	0.9624	0.9424	0.9614	0.8
0.8	1	40	0.800841	0.9571	0.9377	0.9554	0.8
0.81	1	40	0.809831	0.959196	0.9416	0.9564	0.8
0.89	1	40	0.890436	0.95757	0.9349	0.9552	0.9
0.9	1	40	0.899445	0.952929	0.9349	0.9555	0.9
0.91	1	40	0.910321	0.956139	0.9336	0.9546	0.9
0.69	1	100	0.69055	0.9518	0.9465	0.956	0.7
0.7	1	100	0.699795	0.9544	0.95	0.9593	0.7
0.71	1	100	0.710015	0.9551	0.9511	0.9604	0.7
0.79	1	100	0.790249	0.954	0.9545	0.9647	0.8
0.8	1	100	0.799952	0.9528	0.9534	0.9637	0.8
0.81	1	100	0.810095	0.9563	0.9556	0.9666	0.8
0.89	1	100	0.889775	0.9549	0.9618	0.9728	0.9
0.9	1	100	0.899862	0.9564	0.9617	0.9747	0.9
0.91	1	100	0.910099	0.9496	0.9573	0.9699	0.9
0.69	1	200	0.689989	0.9519	0.9496	0.9571	0.7
0.7	1	200	0.70008	0.9496	0.9479	0.9554	0.7
0.71	1	200	0.71016	0.9522	0.9528	0.9604	0.7
0.79	1	200	0.790164	0.9486	0.9544	0.9614	0.8
0.8	1	200	0.799637	0.9501	0.9572	0.9641	0.8
0.81	1	200	0.810033	0.9497	0.9567	0.965	0.8
0.89	1	200	0.889888	0.9495	0.9647	0.9726	0.9
0.9	1	200	0.900203	0.9559	0.9689	0.9772	0.9
0.91	1	200	0.910056	0.9542	0.9707	0.978	0.9
0.69	2	40	0.728098	0.9444	0.8936	0.9128	0.7
0.7	2	40	0.740421	0.9427	0.8901	0.9122	0.7
0.71	2	40	0.750781	0.9449	0.8884	0.9108	0.7
0.79	2	40	0.838306	0.9201	0.8282	0.8717	0.8
0.8	2	40	0.848857	0.918776	0.8243	0.8594	0.8
0.81	2	40	0.858981	0.919192	0.825	0.8597	0.8
0.89	2	40	0.932886	0.885876	0.7478	0.7982	0.9
0.9	2	40	0.941366	0.878862	0.7344	0.7863	0.9
0.91	2	40	0.950015	0.873815	0.7099	0.7697	0.9
0.69	2	100	0.728134	0.9015	0.8684	0.8881	0.7
0.7	2	100	0.739839	0.8936	0.8595	0.8783	0.7
0.71	2	100	0.750666	0.8856	0.8464	0.8685	0.7
0.79	2	100	0.837873	0.8271	0.7681	0.7994	0.8
0.8	2	100	0.848788	0.8099	0.7501	0.7835	0.8
0.81	2	100	0.858409	0.8064	0.7367	0.7741	0.8
0.89	2	100	0.933536	0.7175	0.6284	0.6806	0.9
0.9	2	100	0.941631	0.6996	0.6124	0.6681	0.9
0.91	2	100	0.949683	0.6948	0.6057	0.6689	0.9
0.69	2	200	0.728102	0.8335	0.808	0.8281	0.7
0.7	2	200	0.739822	0.8137	0.7847	0.8044	0.7
0.71	2	200	0.751289	0.7967	0.7708	0.7887	0.7
0.79	2	200	0.838205	0.6566	0.6203	0.6506	0.8
0.8	2	200	0.848913	0.6307	0.5958	0.6267	0.8
0.81	2	200	0.858916	0.615	0.5781	0.6113	0.8
0.89	2	200	0.933746	0.4373	0.4079	0.4527	0.9
0.9	2	200	0.941572	0.4237	0.4007	0.4456	0.9
0.91	2	200	0.949579	0.4036	0.3818	0.4327	0.9
0.69	3	40	0.756982	0.9042	0.8203	0.8483	0.7
0.7	3	40	0.771262	0.8916	0.8022	0.8323	0.7
0.71	3	40	0.784485	0.8857	0.7864	0.8186	0.7
0.79	3	40	0.87335	0.815345	0.6549	0.7226	0.8
0.8	3	40	0.882995	0.813814	0.6435	0.7037	0.8
0.81	3	40	0.893208	0.797477	0.6288	0.6907	0.8
0.89	3	40	0.959001	0.714596	0.4649	0.5363	0.9
0.9	3	40	0.964734	0.7091	0.4522	0.5338	0.9
0.91	3	40	0.971284	0.695536	0.4197	0.5012	0.9
0.69	3	100	0.758728	0.7531	0.6955	0.7285	0.7
0.7	3	100	0.771416	0.7303	0.6662	0.6998	0.7
0.71	3	100	0.783164	0.7131	0.6471	0.6821	0.7
0.79	3	100	0.87291	0.4996	0.4093	0.4543	0.8
0.8	3	100	0.883134	0.4735	0.3849	0.4315	0.8
0.81	3	100	0.892653	0.4485	0.3531	0.4027	0.8
0.89	3	100	0.958523	0.270527	0.1824	0.2255	0.9
0.9	3	100	0.965088	0.255226	0.1672	0.2133	0.9
0.91	3	100	0.970989	0.240845	0.1537	0.2042	0.9
0.69	3	200	0.758933	0.523	0.4846	0.5112	0.7
0.7	3	200	0.770271	0.4968	0.4572	0.4848	0.7
0.71	3	200	0.78335	0.4474	0.4061	0.4369	0.7
0.79	3	200	0.872893	0.1721	0.1488	0.1684	0.8
0.8	3	200	0.882964	0.1515	0.1289	0.1487	0.8
0.81	3	200	0.892699	0.127	0.1087	0.1247	0.8
0.89	3	200	0.958585	0.0243	0.0203	0.0291	0.9
0.9	3	200	0.965292	0.0204	0.0157	0.0219	0.9
0.91	3	200	0.970979	0.0172	0.0131	0.0186	0.9

## Sheet: var. heterogeneity length
AUC	sigma	n	LT	Wald	Wald_cc
0.69	0.5	40	0.329703	0.336562	0.361518
0.69	0.5	100	0.209514	0.213302	0.223302
0.69	0.5	200	0.148396	0.150924	0.155924
0.69	1	40	0.322991	0.330044	0.354933
0.69	1	100	0.204568	0.209036	0.219036
0.69	1	200	0.144828	0.147961	0.152961
0.69	2	40	0.309681	0.316842	0.341502
0.69	2	100	0.195463	0.201138	0.211138
0.69	2	200	0.138085	0.142316	0.147316
0.69	3	40	0.297736	0.304856	0.329169
0.69	3	100	0.186411	0.19327	0.20327
0.69	3	200	0.131511	0.136776	0.141776
0.7	0.5	40	0.32702	0.334019	0.35894
0.7	0.5	100	0.207899	0.211909	0.221909
0.7	0.5	200	0.147118	0.149868	0.154868
0.7	1	40	0.319653	0.326816	0.35167
0.7	1	100	0.202474	0.207241	0.217241
0.7	1	200	0.14318	0.146587	0.151587
0.7	2	40	0.304777	0.312037	0.336592
0.7	2	100	0.19218	0.198262	0.208262
0.7	2	200	0.135701	0.140318	0.145318
0.7	3	40	0.291019	0.298171	0.322193
0.7	3	100	0.182319	0.189665	0.199665
0.7	3	200	0.128768	0.134482	0.139482
0.71	0.5	40	0.324886	0.331875	0.356781
0.71	0.5	100	0.205988	0.210271	0.220271
0.71	0.5	200	0.145758	0.148732	0.153732
0.71	1	40	0.316239	0.323387	0.348175
0.71	1	100	0.200087	0.205155	0.215155
0.71	1	200	0.141442	0.145121	0.150121
0.71	2	40	0.300603	0.307809	0.332223
0.71	2	100	0.188904	0.195416	0.205416
0.71	2	200	0.133238	0.138228	0.143228
0.71	3	40	0.284343	0.29133	0.314989
0.71	3	100	0.178275	0.186097	0.196097
0.71	3	200	0.125503	0.131706	0.136706
0.79	0.5	40	0.297339	0.30456	0.328851
0.79	0.5	100	0.186652	0.193479	0.203479
0.79	0.5	200	0.131945	0.137142	0.142142
0.79	1	40	0.281648	0.288696	0.312221
0.79	1	100	0.175695	0.183821	0.193821
0.79	1	200	0.12368	0.130153	0.135153
0.79	2	40	0.252466	0.256707	0.27777
0.79	2	100	0.155972	0.166183	0.176181
0.79	2	200	0.109183	0.117637	0.122637
0.79	3	40	0.226453	0.226169	0.244445
0.79	3	100	0.138095	0.149904	0.159863
0.79	3	200	0.0963925	0.106323	0.111323
0.8	0.5	40	0.293651	0.300877	0.324999
0.8	0.5	100	0.183576	0.190757	0.200757
0.8	0.5	200	0.129496	0.135099	0.140099
0.8	1	40	0.275311	0.281988	0.305027
0.8	1	100	0.171995	0.180521	0.19052
0.8	1	200	0.121102	0.12793	0.13293
0.8	2	40	0.245292	0.248329	0.268656
0.8	2	100	0.15065	0.161411	0.171402
0.8	2	200	0.105453	0.114372	0.119372
0.8	3	40	0.218792	0.216456	0.233797
0.8	3	100	0.132184	0.144433	0.154353
0.8	3	200	0.0921696	0.102573	0.107573
0.81	0.5	40	0.288478	0.295572	0.319405
0.81	0.5	100	0.180813	0.188311	0.198311
0.81	0.5	200	0.127298	0.133216	0.138216
0.81	1	40	0.270414	0.27659	0.299305
0.81	1	100	0.168037	0.177042	0.187042
0.81	1	200	0.118094	0.12536	0.13036
0.81	2	40	0.23792	0.2398	0.259318
0.81	2	100	0.14583	0.157033	0.167019
0.81	2	200	0.101805	0.111138	0.116138
0.81	3	40	0.2097	0.204894	0.221321
0.81	3	100	0.126434	0.138985	0.14881
0.81	3	200	0.087879	0.098718	0.103718
0.89	0.5	40	0.239894	0.24203	0.261707
0.89	0.5	100	0.146918	0.158001	0.167984
0.89	0.5	200	0.102716	0.111961	0.116961
0.89	1	40	0.212088	0.208256	0.224911
0.89	1	100	0.128245	0.140743	0.150619
0.89	1	200	0.0891574	0.099845	0.104845
0.89	2	40	0.168741	0.151643	0.165074
0.89	2	100	0.0974637	0.11006	0.11845
0.89	2	200	0.0668204	0.0791447	0.084135
0.89	3	40	0.134495	0.107262	0.119886
0.89	3	100	0.0747705	0.0833768	0.0895053
0.89	3	200	0.0506344	0.0630504	0.0677398
0.9	0.5	40	0.232417	0.233467	0.25237
0.9	0.5	100	0.14153	0.153073	0.16304
0.9	0.5	200	0.0988618	0.108562	0.113562
0.9	1	40	0.204187	0.197586	0.213395
0.9	1	100	0.121846	0.134743	0.144493
0.9	1	200	0.0844722	0.0955926	0.100593
0.9	2	40	0.158539	0.138132	0.151185
0.9	2	100	0.0906533	0.10248	0.110204
0.9	2	200	0.0620966	0.0745598	0.0795311
0.9	3	40	0.126167	0.0965072	0.109065
0.9	3	100	0.0676531	0.0743475	0.0799821
0.9	3	200	0.0454982	0.0574756	0.0617822
0.91	0.5	40	0.222809	0.221349	0.23916
0.91	0.5	100	0.135744	0.147705	0.157649
0.91	0.5	200	0.0945534	0.104733	0.109733
0.91	1	40	0.19336	0.184098	0.199029
0.91	1	100	0.114969	0.128034	0.137548
0.91	1	200	0.0796812	0.0911948	0.0961947
0.91	2	40	0.146463	0.123427	0.136211
0.91	2	100	0.0833578	0.0940736	0.101066
0.91	2	200	0.0569213	0.0694386	0.0743368
0.91	3	40	0.115013	0.0831551	0.0956757
0.91	3	100	0.0608805	0.0655158	0.0708005
0.91	3	200	0.0408417	0.0521034	0.05592
